# Supplementary material for: Subgingival microbiome of rheumatoid arthritis patients in relation to their disease status and periodontal health
Source: PLoS One. 2018 Sep 19;13(9):e0202278. doi: 10.1371/journal.pone.0202278 (PMC6145512; doi:10.1371/journal.pone.0202278)
Supplement: S3 Table — (XLSX) [file pone.0202278.s004.xlsx]

## Sheet: Dataset
Supplementary table 3. Dataset of all OTUs, subsampled at 5000 reads/sample, including HOMD taxonomy)
						Gender	1	1	2	2	2	1	2	2	1	1	2	1	2	1	2	2	1	1	2	2	2	2	1	2	1	1	2	2	2	2	1	1	1	2	2	1	2	2	2	2	2	2	2
						Age	70.1	57	62.9	61.5	74.4	73.3	52.8	39.8	58.5	77.3	55.5	66.3	70.3	67	43.6	49.8	43.3	54.8	53.8	38.5	69.3	35.3	61.7	52.7	62.7	72.7	58.4	64	46.6	77.6	55.8	71.9	73.5	50.8	63.5	56.3	67.5	56.7	43.4	73.3	45	47.8	57.6
						Periodontal status	4	3	3	3	4	3	3	3	4	3	3	4	3	3	2	3	3	3	4	2	3	3	3	3	3	3	3	3	2	3	1	4	4	3	3	3	1	1	1	3	3	1	1
						MeanPPD	4.37	2.73	2.66	2.52	2.54	3.5	2.69	2.39	3.21	2.18	2.97	3.48	3.21	2.73	2.63	2.98	2.78	2.79	3.24	2.64	2.98	2.45	2.91	2.63	2.73	2.36	2.6	2.57	2.5	2.75	2.58	2.96	2.95	2.43	2.91	2.46	2.36	2.41	2.51	2.51	2.52	2.43	2.36
						MeanCAL	6.95	2.78	2.95	2.61	3.44	3.57	2.72	2.46	3.87	2.87	3.67	5.27	3.25	3.2	2.52	3.5	2.91	2.77	3.53	2.54	3.3	2.45	3.28	2.91	3.07	3.94	2.65	2.74	2.52	2.83	2.67	3.33	3.56	2.67	3.87	2.53	3.03	2.44	2.57	2.66	2.56	2.5	2.47
						MeanBoP	62	27	23	32	43	70	33	38	38	9	52	42	49	33	35	48	22	41	33	19	45	14	37	23	18	25	27	20	38	36	15	37	29	5	28	9	28	17	20	22	2	15	10
						MeanPI	48	24	33	36	30	50	28	23	25	41	36	86	54	38	36	53	20	48	9	25	53	44	76	30	40	28	42	30	22	83	15	41	33	7	10	14	26	20	36	29	30	25	10
						Smoking status	2	1	1	1	3	3	1	3	2	1	2	3	2	1	3	2	3	1	3	1	2	2	3	1	1	3	3	3	1	1	3	3	1	1	3	1	1	3	1	1	1	1	3
						Disease activity	1	1	1	1	0	1	1	1	1	1	1	1	1	0	1	0	0	0	1	1	0	1	0	1	0	1	0	0	0	0	1	0	1	0	1	1	1	0	0	1	1	1	1
						Seropositivity	1	0	1	1	1	1	1	1	0	1	1	1	0	1	1	1	1	1	1	1	1	0	1	0	1	1	0	1	1	1	0	1	0	1	1	1	0	0	1	1	1	0	1
						RA Medication code	3	2	0	3	3	1	3	1	3	1	2	1	1	1	1	2	1	1	1	1	2	1	1	1	3	3	0	1	3	1	3	1	3	0	3	3	1	3	1	3	3	3	1
						Prednisolon use	1	0	1	1	0	1	0	0	1	0	0	0	0	0	0	0	0	0	1	1	0	0	0	0	0	0	0	0	0	0	0	0	0	1	0	0	1	0	1	0	1	0	0
						DAS28 tercile	3	2	3	3	1	3	2	2	3	2	2	3	3	2	3	1	1	1	3	3	1	3	1	2	2	3	1	1	1	1	2	1	2	1	2	2	2	1	2	2	2	3	2
						VAS tercile	3	3	2	3	1	3	3	2	3	1	3	3	1	1	3	1	1	1	3	2	1	2	2	1	2	2	2	1	1	1	1	1	3	1	3	1	2	1	2	2	2	3	3
						MHAQ tercile	3	3	2	3	2	3	3	3	3	2	3	3	3	1	3	2	2	2	3	2	2	3	1	2	1	3	1	1	1	1	2	1	1	1	3	1	3	1	2	3	2	2	1
						CRP tercile	1	1	2	3	3	3	3	2	3	2	2	3	2	3	1	1	3	1	3	1	3	1	1	1	3	3	1	1	2	1	2	1	3	3	1	3	3	2	2	3	3	2	2
OTU_ID	OTU_ID_taxonomy_by_SILVA_database	Taxonomy_by_HOMD_database			Average (%)	Subject ID	1	2	3	4	6	7	8	10	11	12	13	14	15	16	18	19	20	21	22	23	24	25	26	29	31	32	35	36	37	38	39	40	41	42	43	44	45	46	47	48	49	50	51
OTU_1	OTU_1;D_0__Bacteria;D_1__Fusobacteria;D_2__Fusobacteriia;D_3__Fusobacteriales;D_4__Fusobacteriaceae;D_5__Fusobacterium;D_6__unculturedbacterium	k__Bacteria;p__Fusobacteria;c__Fusobacteriia;o__Fusobacteriales;f__Fusobacteriaceae;g__Fusobacterium			16.1754		31.18	14	0.58	18.9	0.3	19.9	21.7	1.02	3.42	5.46	25.08	19.46	26.3	23.34	14.82	18.68	12.34	10.42	12.06	33.58	30.84	32.08	20.52	12.62	21.5	13.88	8.78	13.14	19.52	16.96	36.14	19.82	6.14	8.12	22.2	3.72	12.66	12.36	16.36	14.16	2.76	6.42	4.12
OTU_10	OTU_10;D_0__Bacteria;D_1__Bacteroidetes;D_2__Bacteroidia;D_3__Bacteroidales;D_4__Porphyromonadaceae;D_5__Paludibacter;D_6__unculturedbacterium	k__Bacteria;p__Bacteroidetes;c__Bacteroidia;o__Bacteroidales;f__Bacteroidales_[F-2];g__Bacteroidales_[G-2];s__sp._oral_taxon_274			1.24385		5.76	0	0.02	5.22	0	0.02	0.56	0	0.74	1.42	0.32	0.02	9.86	0.02	0	0	0.34	0.3	1.54	0.08	2.04	1.52	0	1.04	0	0.38	0.02	0.5	2.08	2.12	0.02	0	0.32	0	0.18	0.2	3.48	0	0	0.26	0.1	0	0
OTU_100	OTU_100;D_0__Bacteria;D_1__Fusobacteria;D_2__Fusobacteriia;D_3__Fusobacteriales;D_4__Leptotrichiaceae;D_5__uncultured	k__Bacteria;p__Fusobacteria;c__Fusobacteriia;o__Fusobacteriales;f__Leptotrichiaceae;g__Sneathia			0.00128205		0	0	0	0	0	0	0	0.1	0	0	0	0	0	0	0	0	0	0	0	0	0	0	0	0	0	0	0	0	0	0	0	0	0	0	0	0	0	0	0	0	0	0	0
OTU_101	OTU_101;D_0__Bacteria;D_1__Spirochaetae;D_2__Spirochaetes;D_3__Spirochaetales;D_4__Spirochaetaceae;D_5__Treponema	k__Bacteria;p__Spirochaetes;c__Spirochaetia;o__Spirochaetales;f__Spirochaetaceae;g__Treponema;s__sp._oral_taxon_257			0.0371795		0	0	0	0	0	0	0	0.08	0	0	0	0	0	0	0	0.02	0	0	0	0.18	0	0.06	0	0.06	0	0	0	0	0	0	0	0	0	0	0	0	0	0	0	0	0	0	0
OTU_103	OTU_103;D_0__Bacteria;D_1__Bacteroidetes;D_2__Bacteroidia;D_3__Bacteroidales;D_4__Prevotellaceae;D_5__Prevotella;D_6__unculturedorganism	k__Bacteria;p__Bacteroidetes;c__Bacteroidia;o__Bacteroidales;f__Prevotellaceae;g__Prevotella;s__sp._oral_taxon_376			0.0835897		0	0	0	0	0	0	0	0.02	0.1	0	0.02	0.04	0	0	0	0.4	0.04	0	0	0	0.18	0	0.42	0	0.24	0	0	0	0	0.26	0	0	0	0	0	0	0	0	0	0.24	0	0	0
OTU_104	OTU_104;D_0__Bacteria;D_1__Firmicutes;D_2__Erysipelotrichia;D_3__Erysipelotrichales;D_4__Erysipelotrichaceae;D_5__;D_6__	k__Bacteria;p__Firmicutes;c__Erysipelotrichia;o__Erysipelotrichales;f__Erysipelotrichaceae;g__Solobacterium;s__moorei			0.045641		0	0	0	0	0	0.02	0.08	0	0	0	0.02	0.1	0	0.02	0	0.02	0	0.08	0	0.02	0.08	0	0.16	0	0.02	0	0.04	0.1	0	0.08	0.02	0	0.02	0	0.46	0	0	0	0.04	0.04	0	0	0
OTU_105	OTU_105;D_0__Bacteria;D_1__Bacteroidetes;D_2__Bacteroidia;D_3__Bacteroidales;D_4__Prevotellaceae;D_5__Prevotella;D_6__Prevotellagenomosp.P4	k__Bacteria;p__Bacteroidetes;c__Bacteroidia;o__Bacteroidales;f__Prevotellaceae;g__Prevotella;s__sp._oral_taxon_526			0.08		0	0	0	0	0	0.32	0	0.02	0	0.02	0.04	0	0	0	0	0.02	0	0	0	0	0.16	0	0	0	0	0	0	0	0	0	0	0	0	0	0	0	0	0	0	0	0	0	0
OTU_106	OTU_106;D_0__Bacteria;D_1__Bacteroidetes;D_2__Bacteroidia;D_3__Bacteroidales;D_4__BacteroidalesIncertaeSedis;D_5__Phocaeicola;D_6__Bacteroidetesbacteriumoraltaxon272	k__Bacteria;p__Bacteroidetes;c__Bacteroidia;o__Bacteroidales;f__Bacteroidaceae;g__Bacteroidaceae_[G-1];s__sp._oral_taxon_272			0.0264103		0	0	0	0	0	0.14	0	0.02	0.02	0	0	0	1	0	0	0	0	0	0	0	0	0	0.4	0	0	0	0	0	0	0	0	0	0.08	0	0	0	0	0	0	0.06	0	0	0
OTU_107	OTU_107;D_0__Bacteria;D_1__Firmicutes;D_2__Negativicutes;D_3__Selenomonadales;D_4__Veillonellaceae;D_5__Anaeroglobus;D_6__unculturedorganism	k__Bacteria;p__Firmicutes;c__Negativicutes;o__Selenomonadales;f__Veillonellaceae;g__Megasphaera;s__sp._oral_taxon_123			0.118462		0	0	0	0	0	2.32	0	0	0.08	0	0	0.02	0	0	0	0.52	0.08	0	0	0	0	0	0	0	0.04	0	0	0	0.04	0	0	0	0	0	0.34	0	0	0	0	0	0	0	0
OTU_108	OTU_108;D_0__Bacteria;D_1__Proteobacteria;D_2__Epsilonproteobacteria;D_3__Campylobacterales;D_4__Campylobacteraceae;D_5__Campylobacter	k__Bacteria;p__Proteobacteria;c__Epsilonproteobacteria;o__Campylobacterales;f__Campylobacteraceae;g__Campylobacter;s__concisus			0.0835897		0	0	0.26	0.1	0.1	0.08	0.1	0.02	0.06	0.02	0.14	0.06	0	0.04	0.08	0	0	0.18	0.04	0	0.04	0	0	0.08	0	0.08	0.02	0.22	0	0	0.06	0	0.1	0.04	0.04	0.06	0.2	0.04	0.08	0.14	0.78	0.04	0.04
OTU_109	OTU_109;D_0__Bacteria;D_1__Firmicutes;D_2__Bacilli;D_3__Lactobacillales;D_4__Lactobacillaceae;D_5__Lactobacillus	k__Bacteria;p__Firmicutes;c__Bacilli;o__Lactobacillales;f__Lactobacillaceae;g__Lactobacillus;(s__oris/s__panis/s__reuteri_genosp._1/s__reuteri_genosp._2)			0.200513		0	0	0	0	0.02	0	0	0	0	0	0	0	0	0	0	0	0	0	0	0	0	0	0	0	0	0	0	0	0	0	0	15.32	0	0	0	0	0	0	0.02	0	0	0	0
OTU_11	OTU_11;D_0__Bacteria;D_1__Spirochaetae;D_2__Spirochaetes;D_3__Spirochaetales;D_4__Spirochaetaceae;D_5__Treponema;D_6__Treponemasp.6:H:D15A-4	k__Bacteria;p__Spirochaetes;c__Spirochaetia;o__Spirochaetales;f__Spirochaetaceae;g__Treponema;s__socranskii			2.5341		7.7	0.38	0.02	1.58	0.68	0.88	4.98	0.12	0.6	1.66	1.1	0.84	9	2.36	2.26	4.16	1.4	0.64	0.06	0.28	1.62	6.6	2.82	1.04	3.02	0.06	0.12	2.5	6.02	3.9	5.16	2.18	0.94	0.04	6.52	0.34	4.02	0.02	3.08	4.66	0	0	0
OTU_112	OTU_112;D_0__Bacteria;D_1__Proteobacteria;D_2__Deltaproteobacteria;D_3__Desulfovibrionales;D_4__Desulfovibrionaceae;D_5__Bilophila;D_6__Bilophilawadsworthia3_1_6	k__Bacteria;p__Proteobacteria;c__Deltaproteobacteria;o__Desulfovibrionales;f__Desulfovibrionaceae;g__Desulfovibrio;s__fairfieldensis			0.0387179		2.76	0	0	0	0	0	0	0	0	0.02	0	0	0	0	0	0	0.02	0	0	0	0	0	0	0	0	0	0	0	0	0	0	0	0	0	0	0	0	0	0	0	0	0	0
OTU_113	OTU_113;D_0__Bacteria;D_1__Bacteroidetes;D_2__Bacteroidia;D_3__Bacteroidales;D_4__Prevotellaceae;D_5__Prevotella;D_6__Prevotellamicans	k__Bacteria;p__Bacteroidetes;c__Bacteroidia;o__Bacteroidales;f__Prevotellaceae;g__Prevotella;s__micans			0.0523077		0.08	0	0	0.66	0	0	0	0	0	0	0	0	0	0	0	0.22	0	0.02	0	0	0	0	0	0.44	0.02	0	0.26	0	0	0	0.02	0	0	0	0	0	0.02	0	0	0	0	0	0
OTU_114	OTU_114;D_0__Bacteria;D_1__Firmicutes;D_2__Clostridia;D_3__Clostridiales;D_4__Ruminococcaceae;D_5__uncultured	k__Bacteria;p__Firmicutes;c__Clostridia;o__Clostridiales;f__Ruminococcaceae;g__Ruminococcaceae_[G-1];s__sp._oral_taxon_075			0.0379487		0	0	0	0.1	0	0.1	0.22	0	0	0	0	0	0	0	0	0	0.04	0.2	0	0	0	0	0	0.38	0	0	0	0.02	0.12	0	0	0.02	0	0	0.02	0.04	0.14	0	0.08	0	0	0	0
OTU_115	OTU_115;D_0__Bacteria;D_1__Bacteroidetes;D_2__Bacteroidia;D_3__Bacteroidales;D_4__Prevotellaceae;D_5__Alloprevotella;D_6__unculturedorganism	k__Bacteria;p__Bacteroidetes;c__Bacteroidia;o__Bacteroidales;f__Prevotellaceae;g__Alloprevotella;s__rava			0.0689744		0	0	0	0	0	0.14	0.14	0	0.16	0	0.04	0.22	0	0	0	0.28	0	0.1	0	0	0.12	0	0.28	0.06	0.24	0	0	0.16	0.02	0.06	0.22	0	0.1	0	0	0	0.06	0	0	0	0	0	0
OTU_116	OTU_116;D_0__Bacteria;D_1__Bacteroidetes;D_2__Flavobacteriia;D_3__Flavobacteriales;D_4__Flavobacteriaceae;D_5__Capnocytophaga	k__Bacteria;p__Bacteroidetes;c__Flavobacteriia;o__Flavobacteriales;f__Flavobacteriaceae;g__Capnocytophaga;s__haemolytica			0.107179		0	0	0.3	0.08	0	0	0.72	0	0	0	0	0	0	0	0	0	0	0	0	0	0	0	0	0	0	0	0	0	0.5	0	0	0	0	0	0	0.1	0	0	0.78	0	0	0	0.06
OTU_117	OTU_117;D_0__Bacteria;D_1__Bacteroidetes;D_2__Bacteroidia;D_3__Bacteroidales;D_4__Prevotellaceae;D_5__Prevotella;D_6__Prevotellaenoeca	k__Bacteria;p__Bacteroidetes;c__Bacteroidia;o__Bacteroidales;f__Prevotellaceae;g__Prevotella;s__enoeca			0.0412821		0.02	0	0	0	0	0	0	0.1	0	0	0.1	0	2.06	0	0	0.5	0	0	0.02	0	0	0	0	0.08	0	0	0	0	0.14	0	0	0	0	0	0	0	0	0	0	0	0	0	0
OTU_118	OTU_118;D_0__Bacteria;D_1__Bacteroidetes;D_2__Bacteroidia;D_3__Bacteroidales;D_4__Prevotellaceae;D_5__Prevotella;D_6__	k__Bacteria;p__Bacteroidetes;c__Bacteroidia;o__Bacteroidales;f__Prevotellaceae;g__Prevotella;s__sp._oral_taxon_304			0.0202564		0	0	0	0	0	0	0	0	0	0	0	0	0	0	0	0	0	0	0	0	0	0	0	0	0	0	0	0	0	0	0	0.54	0	0	0	0	0	0	0	0	0	0	0
OTU_119	OTU_119;D_0__Bacteria;D_1__Bacteroidetes;D_2__Bacteroidia;D_3__Bacteroidales;D_4__Prevotellaceae;D_5__Prevotella;D_6__PrevotellabuccaeATCC33574	k__Bacteria;p__Bacteroidetes;c__Bacteroidia;o__Bacteroidales;f__Prevotellaceae;g__Prevotella;s__buccae			0.127692		0	0	0	0	0	0	0	0	0.04	0	0.08	0	3.56	0	0.18	0.54	0.02	0	0	0	0.26	0	0.2	0.02	0.38	0	0	0.12	0	0.36	0.34	0.24	0	0	0.06	0	0	0	0	0.18	0	0	0
OTU_12	OTU_12;D_0__Bacteria;D_1__Proteobacteria;D_2__Epsilonproteobacteria;D_3__Campylobacterales;D_4__Campylobacteraceae;D_5__Campylobacter	k__Bacteria;p__Proteobacteria;c__Epsilonproteobacteria;o__Campylobacterales;f__Campylobacteraceae;g__Campylobacter;s__gracilis			2.15462		2.98	0.92	0.52	4.24	7.56	2.12	1.74	0	0.32	5.38	1.88	0.96	5.22	4.94	2.22	1.56	1.26	0.7	3	6.18	2.56	0.9	3.48	1.84	0.16	2.14	0.48	1.68	4.44	1.04	2.96	2.98	2.02	0.8	1.24	2.02	3.22	0.44	3.86	0.86	0.86	2.72	0.22
OTU_120	OTU_120;D_0__Bacteria;D_1__Actinobacteria;D_2__Actinobacteria;D_3__Micrococcales;D_4__Micrococcaceae;D_5__Rothia	k__Bacteria;p__Actinobacteria;c__Actinobacteria;o__Actinomycetales;f__Micrococcaceae;g__Rothia;s__mucilaginosa			0.0233333		0	0	0.14	0	0.02	0	0	0.06	0.02	0	0	0	0	0	0	0	0	0	0.06	0	0.12	0	0	0	0	0	0	0	0	0	0	0	0	0	0.04	0	0	0	0	0.02	0	0.04	0
OTU_122	OTU_122;D_0__Bacteria;D_1__Bacteroidetes;D_2__Bacteroidia;D_3__Bacteroidales;D_4__Porphyromonadaceae;D_5__Odoribacter;D_6__Odoribacterdenticanis	k__Bacteria;p__Bacteroidetes;c__Bacteroidetes_[C-2];o__Bacteroidetes_[O-2];f__Bacteroidetes_[F-2];g__Bacteroidetes_[G-6];s__sp._oral_taxon_516			0.00153846		0	0	0	0	0	0	0	0.08	0.02	0	0	0	0	0	0	0	0	0	0	0.02	0	0	0	0	0	0	0	0	0	0	0	0	0	0	0	0	0	0	0	0	0	0	0
OTU_123	OTU_123;D_0__Bacteria;D_1__Firmicutes;D_2__Clostridia;D_3__Clostridiales;D_4__Defluviitaleaceae;D_5__uncultured;D_6__unculturedLachnospiraceaebacterium	k__Bacteria;p__Firmicutes;c__Clostridia;o__Clostridiales;f__Lachnospiraceae_[XIV];g__Lachnospiraceae_[G-8];s__sp._oral_taxon_500			0.0287179		0	0	0	0	0	0	0	0.02	0	0.02	0	0	0	0	0	0.02	0.1	0	0	0	0.04	0.2	0	0	0	0	0	0	0.02	0	0	0	0	0	0	0	0	0	0	0.06	0	0	0
OTU_124	OTU_124;D_0__Bacteria;D_1__Proteobacteria;D_2__Betaproteobacteria;D_3__Burkholderiales;D_4__Comamonadaceae	k__Bacteria;p__Proteobacteria;c__Betaproteobacteria;o__Burkholderiales;f__Comamonadaceae			0.0274359		0	0	0	0	0	0	0	0	0	0	0	0.02	0.14	0.02	0	0	0.06	0	0.06	0.74	0	0	0	0.02	0	0	0	0.04	0	0.02	0.04	0	0	0	0.04	0	0.02	0	0	0.02	0	0	0
OTU_125	OTU_125;D_0__Bacteria;D_1__Fusobacteria;D_2__Fusobacteriia;D_3__Fusobacteriales;D_4__Leptotrichiaceae;D_5__Leptotrichia	k__Bacteria;p__Fusobacteria;c__Fusobacteriia;o__Fusobacteriales;f__Leptotrichiaceae;g__Leptotrichia			0.0323077		0	0	0	0	0	0	0	0.02	0	0	0	0	0	0	0	0	0	0	0	0	0	0	0	0.18	0.14	0	0	0	0	0	0	0	0	0	0	0	0	0	0	0	0	0	0
OTU_127	OTU_127;D_0__Bacteria;D_1__Firmicutes;D_2__Clostridia;D_3__Clostridiales;D_4__FamilyXIII;D_5__Mogibacterium;D_6__Mogibacteriumtimidum	k__Bacteria;p__Firmicutes;c__Clostridia;o__Clostridiales;f__Peptostreptococcaceae_[XI];g__Mogibacterium;s__timidum			0.0361538		0	0	0	0	0	0	0	0	0.02	0	0	0.04	0.06	0.04	0.06	0.1	0.04	0	0	0	0.06	0	0.04	0	0	0	0.02	0.02	0.08	0.18	0	0	0	0	0	0	0	0	0	0.08	0	0	0
OTU_128	OTU_128;D_0__Bacteria;D_1__Spirochaetae;D_2__Spirochaetes;D_3__Spirochaetales;D_4__Spirochaetaceae;D_5__Treponema	k__Bacteria;p__Spirochaetes;c__Spirochaetia;o__Spirochaetales;f__Spirochaetaceae;g__Treponema			0.0512821		0	0	0	0	0	0	0	0.02	0	0	0	0	0	0	0	2.14	0.02	0	0	0	0	0.46	0	0.04	0	0	0	0	0	0	0	0	0	0	0	0	0	0	0	0	0	0	0
OTU_13	OTU_13;D_0__Bacteria;D_1__Spirochaetae;D_2__Spirochaetes;D_3__Spirochaetales;D_4__Spirochaetaceae;D_5__Treponema	k__Bacteria;p__Spirochaetes;c__Spirochaetia;o__Spirochaetales;f__Spirochaetaceae;g__Treponema;s__denticola			0.731795		0	0	0	0	0	0	0.06	0.12	0.68	0	0.86	0.22	2.56	0	0	0.92	2.66	0.36	0.2	0.08	0.26	0	0	0.32	0.02	0	0	3.38	0.24	6.36	0	0.22	0	0	0	0	0.04	0	0	2.02	0	0	0
OTU_130	OTU_130;D_0__Bacteria;D_1__Firmicutes;D_2__Bacilli;D_3__Lactobacillales;D_4__Lactobacillaceae;D_5__Lactobacillus	k__Bacteria;p__Firmicutes;c__Bacilli;o__Lactobacillales;f__Lactobacillaceae;g__Lactobacillus;s__salivarius			0.0789744		0	0	0	0	0	0	0	0	0	0	0	0	0	0	0	0	0	0	0	0	0	0	0	0	0	0	0	0	0	0	0	6.1	0	0	0	0	0	0	0	0	0	0	0
OTU_131	OTU_131;D_0__Bacteria;D_1__CandidatedivisionSR1	k__Bacteria;p__SR1;c__SR1_[C-1];o__SR1_[O-1];f__SR1_[F-1];g__SR1_[G-1];s__sp._oral_taxon_345			0.0179487		0	0	0	0.02	0	0	0.08	0	0	0	0.02	0	0	0.02	0	0.22	0.02	0.04	0	0	0	0	0	0.06	0	0	0	0	0.1	0	0.06	0	0	0	0	0	0	0	0	0	0	0	0
OTU_132	OTU_132;D_0__Bacteria;D_1__Firmicutes;D_2__Clostridia;D_3__Clostridiales;D_4__FamilyXIII;D_5__uncultured	k__Bacteria;p__Firmicutes;c__Clostridia;o__Clostridiales;f__Peptostreptococcaceae_[XI];g__Peptostreptococcaceae_[XI][G-4];s__sp._oral_taxon_369			0.0269231		0	0	0	0	0	0	0	0	0	0	0	0.02	0	0	0	0	0.02	0	0	0.04	0.2	0	0.04	0	0.16	0	0	0.02	0.06	0.04	0.02	0.04	0	0	0.02	0	0	0	0	0.04	0	0	0
OTU_133	OTU_133;D_0__Bacteria;D_1__Bacteroidetes;D_2__Flavobacteriia;D_3__Flavobacteriales;D_4__Flavobacteriaceae;D_5__Capnocytophaga;D_6__unculturedbacterium	k__Bacteria;p__Bacteroidetes;c__Flavobacteriia;o__Flavobacteriales;f__Flavobacteriaceae;g__Capnocytophaga;s__sp._oral_taxon_338			0.0266667		0	0	0	0	0	0	0	0	0	0	0.04	0.04	0	0	0	0.1	0.16	0.04	0	0.02	0.02	0	0	0	0	0.08	0.04	0	0.12	0	0	0	0	0.06	0	0.04	0.02	0.02	0	0	0.1	0	0
OTU_134	OTU_134;D_0__Bacteria;D_1__Firmicutes;D_2__Clostridia;D_3__Clostridiales;D_4__FamilyXIII;D_5__IncertaeSedis;D_6__[Eubacterium]infirmum	k__Bacteria;p__Firmicutes;c__Clostridia;o__Clostridiales;f__Peptostreptococcaceae_[XI];g__Peptostreptococcaceae_[XI][G-1]			0.0351282		0	0	0	0	0	0	0.1	0	0	0	0.02	0.02	0.06	0	0	0	0.02	0	0	0	0	0.04	0.12	0	0	0	0	0.16	0.04	0.04	0.06	0.02	0	0	0.06	0	0	0	0	0.08	0	0	0
OTU_135	OTU_135;D_0__Bacteria;D_1__Firmicutes;D_2__Clostridia;D_3__Clostridiales;D_4__Peptostreptococcaceae;D_5__Peptostreptococcus;D_6__unculturedbacterium	k__Bacteria;p__Firmicutes;c__Clostridia;o__Clostridiales;f__Peptostreptococcaceae_[XI];g__Peptostreptococcus;s__stomatis			0.0151282		0	0.08	0	0	0	0	0	0	0	0	0	0	0	0	0	0	0	0	0	0	0	0	0	0.02	0.16	0	0.04	0.04	0	0	0	0	0	0	0	0	0	0	0	0.02	0	0	0.02
OTU_136	OTU_136;D_0__Bacteria;D_1__Firmicutes;D_2__Clostridia;D_3__Clostridiales;D_4__Lachnospiraceae;D_5__Stomatobaculum;D_6__unculturedbacterium	k__Bacteria;p__Firmicutes;c__Clostridia;o__Clostridiales;f__Lachnospiraceae_[XIV];g__Stomatobaculum			0.0410256		0.14	0	0	0	0	0.38	0.08	0	0	0.14	0.1	0	0	0.04	0.34	0	0.02	0.1	0	0.02	0	0	0.26	0.02	0	0	0.08	0.08	0	0.02	0.02	0.02	0.08	0	0	0	0	0	0.08	0.08	0	0.02	0
OTU_137	OTU_137;D_0__Bacteria;D_1__Firmicutes;D_2__Erysipelotrichia;D_3__Erysipelotrichales;D_4__Erysipelotrichaceae;D_5__Bulleidia;D_6__unculturedbacterium	k__Bacteria;p__Firmicutes;c__Erysipelotrichia;o__Erysipelotrichales;f__Erysipelotrichaceae;g__Bulleidia;s__extructa			0.0207692		0	0	0	0	0	0.04	0.02	0	0	0	0.12	0.16	0.04	0	0	0.06	0	0	0.02	0	0	0	0	0	0.12	0	0	0.02	0.14	0.02	0	0	0	0	0	0	0.02	0	0	0	0	0	0
OTU_138	OTU_138;D_0__Bacteria;D_1__Proteobacteria;D_2__Epsilonproteobacteria;D_3__Campylobacterales;D_4__Campylobacteraceae;D_5__Campylobacter;D_6__unculturedCampylobactersp.	k__Bacteria;p__Proteobacteria;c__Epsilonproteobacteria;o__Campylobacterales;f__Campylobacteraceae;g__Campylobacter;s__sp._oral_taxon_044			0.01		0	0	0	0	0	0.46	0	0	0	0	0	0	0	0	0	0.02	0	0	0	0	0	0	0.06	0	0	0	0.02	0	0	0	0	0	0	0	0	0	0	0	0	0	0	0	0
OTU_139	OTU_139;D_0__Bacteria;D_1__Actinobacteria;D_2__Actinobacteria;D_3__Actinomycetales;D_4__Actinomycetaceae;D_5__Actinomyces	k__Bacteria;p__Actinobacteria;c__Actinobacteria;o__Actinomycetales;f__Actinomycetaceae;g__Actinomyces			0.0115385		0	0.02	0	0	0.02	0	0	0.02	0.02	0.02	0	0.16	0	0	0	0	0	0	0	0	0	0	0	0.02	0.02	0	0	0	0	0.02	0	0	0	0	0	0	0	0	0	0	0	0	0
OTU_14	OTU_14;D_0__Bacteria;D_1__Bacteroidetes;D_2__Bacteroidia;D_3__Bacteroidales;D_4__Prevotellaceae;D_5__Prevotella	k__Bacteria;p__Bacteroidetes;c__Bacteroidia;o__Bacteroidales;f__Prevotellaceae;g__Prevotella;s__oris			2.6359		0.06	0	0.16	6.8	12.68	13.16	2.72	0.3	0.12	0.06	1.88	7.64	0	13.9	2.38	2.58	4.74	2.04	0.24	1.68	3.66	0.34	1.54	0.76	1.3	0.2	0.2	7.6	1.22	0.52	2.9	4.54	5.4	0.02	1.72	0	0.62	1.14	4	0.56	3.26	9.3	0.14
OTU_140	OTU_140;D_0__Bacteria;D_1__Proteobacteria;D_2__Gammaproteobacteria;D_3__Pseudomonadales;D_4__Moraxellaceae;D_5__Moraxella	k__Bacteria;p__Proteobacteria;c__Gammaproteobacteria;o__Pseudomonadales;f__Moraxellaceae;g__Moraxella			0.000512821		0	0	0	0	0	0	0	0	0	0	0	0	0	0	0	0	0	0	0	0	0	0	0	0	0	0	0	0	0	0	0	0	0	0	0	0	0	0	0	0	0	0	0
OTU_142	OTU_142;D_0__Bacteria;D_1__Chloroflexi;D_2__Anaerolineae;D_3__Anaerolineales;D_4__Anaerolineaceae;D_5__uncultured;D_6__Chloroflexibacteriumoraltaxon439isolateChl1-2	k__Bacteria;p__Chloroflexi;c__Anaerolineae;o__Anaerolineales;f__Anaerolineaceae;g__Anaerolineae_[G-1];s__sp._oral_taxon_439			0.0282051		0.14	0	0	0	0	0	0	0	0.02	0.04	0	0	0	0	0	0	0.1	0	0	0	0	0	0	0	0	0	0	0	0	0	0	0	0.08	0	0	0	0	0	0	0.08	0	0	0
OTU_143	OTU_143;D_0__Bacteria;D_1__Firmicutes;D_2__Clostridia;D_3__Clostridiales;D_4__Lachnospiraceae;D_5__Johnsonella;D_6__unculturedLachnospiraceaebacterium	k__Bacteria;p__Firmicutes;c__Clostridia;o__Clostridiales;f__Lachnospiraceae_[XIV];g__Johnsonella;s__sp._oral_taxon_166			0.03		0	0	0	0	0	0	0	0	0	0	0.02	0	0	0	0	0	0	0	0.02	0	0.04	0.92	0	0	0.22	0	0.02	0	0	0	0	0	0	0	0	0	0	0	0	0	0	0	0
OTU_144	OTU_144;D_0__Bacteria;D_1__Bacteroidetes;D_2__Bacteroidia;D_3__Bacteroidales;D_4__Rikenellaceae;D_5__RC9gutgroup;D_6__Bacteroidalesgenomosp.P8oralcloneMB4_G15	k__Bacteria;p__Bacteroidetes;c__Bacteroidetes_[C-1];o__Bacteroidetes_[O-1];f__Bacteroidetes_[F-1];g__Bacteroidetes_[G-3]			0.0915385		0	0	0	0	0	0	0	0.02	2.44	0	0	0	0	0	0	0	0	0	0	0	0	2.8	0	0	0.06	0	0	0	0	0.02	0	0	0	0	0	0	0	0	0	0	0	0	0
OTU_145	OTU_145;D_0__Bacteria;D_1__Firmicutes;D_2__Clostridia;D_3__Clostridiales;D_4__Eubacteriaceae;D_5__Pseudoramibacter;D_6__unculturedbacterium	k__Bacteria;p__Firmicutes;c__Clostridia;o__Clostridiales;f__Eubacteriaceae_[XV];g__Pseudoramibacter;s__alactolyticus			0.0330769		0	0	0	0	0	0.04	0	0	0.04	0.06	0	0	0.18	0.18	0	0.02	0	0	0	0	0	0	0	0	0	0	0	0	0.04	0	0	0	0	0	0.02	0	0	0	0	0.02	0	0	0
OTU_146	OTU_146;D_0__Bacteria;D_1__BD1-5;D_2__Gracilibacteriabacteriumoraltaxon873;D_3__Gracilibacteriabacteriumoraltaxon873;D_4__Gracilibacteriabacteriumoraltaxon873;D_5__Gracilibacteriabacteriumoraltaxon873;D_6__Gracilibacteriabacteriumoraltaxon873	k__Bacteria;p__Gracilibacteria_(GN02);c__GN02_[C-2];o__GN02_[O-2];f__GN02_[F-2];g__GN02_[G-2];s__sp._oral_taxon_873			0.000512821		0	0	0	0	0	0	0	0	0	0	0	0	0	0	0	0	0	0	0	0	0	0	0	0	0	0	0.02	0	0	0	0	0	0	0	0	0	0	0.02	0	0	0	0	0
OTU_148	OTU_148;D_0__Bacteria;D_1__Bacteroidetes;D_2__Bacteroidia;D_3__Bacteroidales;D_4__Prevotellaceae;D_5__Prevotella;D_6__	k__Bacteria;p__Bacteroidetes;c__Bacteroidia;o__Bacteroidales;f__Prevotellaceae;g__Prevotella;s__marshii			0.0366667		0	0	0	0	0	0	0	0	0	0	0.78	0.02	0	0	0	0.04	0	0	0	0	0.06	0.06	0.12	0.02	0.1	0	0	0	0.04	0.06	0	0	0	0	0	0	0	0	0	0	0	0	0
OTU_149	OTU_149;D_0__Bacteria;D_1__Actinobacteria;D_2__Actinobacteria;D_3__Actinomycetales;D_4__Actinomycetaceae;D_5__Actinomyces	k__Bacteria;p__Actinobacteria;c__Actinobacteria;o__Actinomycetales;f__Actinomycetaceae;g__Actinomyces;s__sp._oral_taxon_897			0.065641		0	0	0	0	0	0.16	0	0	0	0.02	0	0	0.08	0.08	0	0.08	0.02	0.1	0	0.02	0	0	0	0.06	0.06	0.06	0	0.18	0.4	0	0	0	0	0	0	0.02	0.46	0	0	0.1	0	0	0.02
OTU_15	OTU_15;D_0__Bacteria;D_1__Actinobacteria;D_2__Actinobacteria;D_3__Micrococcales;D_4__Micrococcaceae;D_5__Rothia;D_6__unculturedbacterium	k__Bacteria;p__Actinobacteria;c__Actinobacteria;o__Actinomycetales;f__Micrococcaceae;g__Rothia;s__dentocariosa			1.83974		0.58	0.24	5.82	0.42	3.8	0.6	0.22	3.96	9.28	2.22	0.2	2.2	0	1.52	0.12	0.08	23.36	0.06	8.62	0.26	2.36	0.02	0.06	0.04	0.06	0	0.02	0	0.9	0.16	0.98	0.08	0.66	13.2	1.1	0.08	0.6	0.56	2.34	2.82	6.24	5.4	0.58
OTU_150	OTU_150;D_0__Bacteria;D_1__Firmicutes;D_2__Negativicutes;D_3__Selenomonadales;D_4__Veillonellaceae;D_5__Selenomonas;D_6__	k__Bacteria;p__Firmicutes;c__Negativicutes;o__Selenomonadales;f__Veillonellaceae;g__Selenomonas			0.302821		3.44	0	0.7	0.5	0	0.12	0	0.02	0.28	0	0.22	0.06	0.04	0.48	0.16	0.04	0	0.78	0.5	0.04	0	0	0	0	0.06	0.04	0.14	0.1	0.22	0.02	0.04	0.02	0.14	0.06	6.24	0.08	0.48	0.16	0.08	0.56	0.22	0.64	0.32
OTU_151	OTU_151;D_0__Bacteria;D_1__Bacteroidetes;D_2__Sphingobacteriia;D_3__Sphingobacteriales;D_4__WCHB1-69;D_5__Bacteroidalesgenomosp.P4oralcloneMB2_G17;D_6__Bacteroidalesgenomosp.P4oralcloneMB2_G17	k__Bacteria;p__Bacteroidetes;c__Bacteroidetes_[C-1];o__Bacteroidetes_[O-1];f__Bacteroidetes_[F-1];g__Bacteroidetes_[G-5];s__sp._oral_taxon_507			0.0617949		0	0	0	0	0	0	0	0	0	0	0	0	0	0	0	0	0	0	0	0	0	4.82	0	0	0	0	0	0	0	0	0	0	0	0	0	0	0	0	0	0	0	0	0
OTU_152	OTU_152;D_0__Bacteria;D_1__Spirochaetae;D_2__Spirochaetes;D_3__Spirochaetales;D_4__Spirochaetaceae;D_5__Treponema;D_6__Treponemasp.oraltaxon250	k__Bacteria;p__Spirochaetes;c__Spirochaetia;o__Spirochaetales;f__Spirochaetaceae;g__Treponema			0.0633333		0	0	0	0	0	0	0	0	0	0	0	0	0	0	0	0.3	0.64	0	0	0	0	0.9	0	0	0.08	0	0	0	0.22	0	0	0	0	0	0	0	0	0	0	0	0	0	0
OTU_153	OTU_153;D_0__Bacteria;D_1__Firmicutes;D_2__Clostridia;D_3__Clostridiales;D_4__Lachnospiraceae;D_5__Catonella;D_6__unculturedbacterium	k__Bacteria;p__Firmicutes;c__Clostridia;o__Clostridiales;f__Lachnospiraceae_[XIV];g__Catonella;s__sp._oral_taxon_451			0.0120513		0	0	0	0	0	0	0	0	0	0	0	0	0	0	0	0	0	0	0	0	0.12	0.12	0	0	0.16	0	0	0	0	0.18	0	0	0	0	0	0	0	0	0	0	0	0	0
OTU_155	OTU_155;D_0__Bacteria;D_1__Firmicutes;D_2__Clostridia;D_3__Clostridiales;D_4__Lachnospiraceae;D_5__Johnsonella;D_6__unculturedbacterium	k__Bacteria;p__Firmicutes;c__Clostridia;o__Clostridiales;f__Lachnospiraceae_[XIV];g__Lachnospiraceae_[G-3];s__sp._oral_taxon_100			0.0482051		0	0	0	0.2	0	0	0.02	0	0.04	0	0.02	0	0	0	0	0	0.1	0.14	0.08	0.02	0	0.02	0.02	0.28	0	0.1	0.02	0.02	0.3	0	0.04	0	0	0	0.26	0.2	0.1	0.46	0	0	0	0	0.2
OTU_156	OTU_156;D_0__Bacteria;D_1__Firmicutes;D_2__Clostridia;D_3__Clostridiales;D_4__Lachnospiraceae;D_5__uncultured	k__Bacteria;p__Firmicutes;c__Clostridia;o__Clostridiales;f__Lachnospiraceae_[XIV]			0.0341026		0	0	0.02	1.52	0	0	0.02	0	0	0	0.04	0	0	0	0	0.02	0	0.1	0	0	0	0	0	0	0	0	0.04	0	0.08	0.02	0	0	0	0	0.18	0	0.04	0	0	0	0	0	0.02
OTU_157	OTU_157;D_0__Bacteria;D_1__CandidatedivisionTM7;D_2__;D_3__;D_4__;D_5__;D_6__	k__Bacteria;p__Saccharibacteria_(TM7);c__TM7_[C-1];o__TM7_[O-1];f__TM7_[F-2];g__TM7_[G-5];s__sp._oral_taxon_356			0.0874359		0.08	0	0	0.36	0	0.38	0	0	0	0	0	0	0.6	0	0	0.38	0.04	0	0	0	0.06	0.18	0	0.08	0	0	0	0.56	0.14	0	0.1	0	0	0	0	0	0.4	0	0	0	0	0	0
OTU_158	OTU_158;D_0__Bacteria;D_1__Bacteroidetes;D_2__Bacteroidia;D_3__Bacteroidales;D_4__Prevotellaceae;D_5__Prevotella;D_6__unculturedbacterium	k__Bacteria;p__Bacteroidetes;c__Bacteroidia;o__Bacteroidales;f__Prevotellaceae;g__Prevotella;s__sp._oral_taxon_315			0.0302564		0	0	0	0	0	0	0.04	0	0	0	0	0.16	0	0	0	0.1	0.02	0	0	0	0.04	0	0	0.04	0.14	0.02	0.02	0.02	0.04	0	0	0.06	0	0	0.2	0	0	0	0	0	0	0	0
OTU_16	OTU_16;D_0__Bacteria;D_1__Synergistetes;D_2__Synergistia;D_3__Synergistales;D_4__Synergistaceae	k__Bacteria;p__Synergistetes;c__Synergistia;o__Synergistales;f__Synergistaceae;g__Fretibacterium;s__sp._oral_taxon_360			1.54974		1.44	0	0	0.02	0	0.14	0.26	0.22	1.78	2.64	0.38	0.34	8.22	0.1	0	3.98	2.96	0	0.4	0.42	3.86	3.38	0	0.12	6.32	0.02	0	0.56	1.24	3.1	0.02	1.72	0.16	0.02	0.14	0	0.1	0	0	3.4	0.02	0	0
OTU_162	OTU_162;D_0__Bacteria;D_1__Firmicutes;D_2__Negativicutes;D_3__Selenomonadales;D_4__Veillonellaceae;D_5__uncultured	k__Bacteria;p__Firmicutes;c__Negativicutes;o__Selenomonadales;f__Veillonellaceae;g__Mitsuokella;s__sp._oral_taxon_131			0.0825641		0	0	0	0	0	0	0.02	0	0	0.26	0	0.96	0	0	0	0	0.04	0.06	0.02	0	0	0	0.1	0	0	0	0	1.08	0	0	0	0.08	2.56	0	0	0	0.06	0	0	0	0	0	0
OTU_163	OTU_163;D_0__Bacteria;D_1__Firmicutes;D_2__Bacilli;D_3__Lactobacillales;D_4__Streptococcaceae;D_5__Streptococcus;D_6__	k__Bacteria;p__Firmicutes;c__Bacilli;o__Lactobacillales;f__Streptococcaceae;g__Streptococcus;(s__downei/s__sobrinus)			0.035641		0	0	0	0	0	0	0	0	0	0	0	2.62	0	0	0	0	0.04	0	0	0	0	0	0	0	0	0	0	0	0	0	0	0.04	0	0	0	0	0	0	0	0	0	0	0
OTU_165	OTU_165;D_0__Bacteria;D_1__Bacteroidetes;D_2__Bacteroidia;D_3__Bacteroidales;D_4__Porphyromonadaceae;D_5__Porphyromonas;D_6__Porphyromonassp.S886-12	k__Bacteria;p__Bacteroidetes;c__Bacteroidia;o__Bacteroidales;f__Porphyromonadaceae;g__Porphyromonas;s__uenonis			0.014359		0	0	0	0	0	0	0	0	0	0	0.02	0	0	0	0	0	0.08	0	0	0	0	0	0	0	0.02	0	0	0	0	0	0	0	0	0	0	0	0	0	0	0	0	0	0
OTU_166	OTU_166;D_0__Bacteria;D_1__Bacteroidetes;D_2__Sphingobacteriia;D_3__Sphingobacteriales;D_4__env.OPS17	k__Bacteria;p__Bacteroidetes			0.00487179		0	0	0	0	0	0	0	0	0	0	0	0	0	0	0	0	0	0	0	0	0	0	0	0	0	0	0	0	0	0	0	0	0	0	0	0	0	0	0	0	0	0	0
OTU_167	OTU_167;D_0__Bacteria;D_1__Proteobacteria;D_2__Gammaproteobacteria;D_3__Pseudomonadales;D_4__Moraxellaceae;D_5__Enhydrobacter;D_6__unculturedbacterium	k__Bacteria;p__Proteobacteria;c__Gammaproteobacteria;o__Pseudomonadales;f__Moraxellaceae;g__Moraxella;s__osloensis			0.000769231		0	0	0	0	0	0	0	0	0	0	0	0	0	0	0	0	0	0	0	0	0	0	0	0	0	0	0	0	0	0	0	0	0	0	0	0	0	0	0	0	0	0	0
OTU_168	OTU_168;D_0__Bacteria;D_1__Actinobacteria;D_2__Actinobacteria;D_3__Micrococcales;D_4__Micrococcaceae;D_5__Kocuria;D_6__	k__Bacteria;p__Actinobacteria;c__Actinobacteria;o__Actinomycetales;f__Micrococcaceae;g__Kocuria;s__sp._oral_taxon_189			0.000512821		0	0	0	0	0	0	0	0	0	0	0	0	0	0	0	0	0	0	0	0	0	0	0	0.02	0	0	0	0	0	0	0	0	0	0	0	0	0	0	0	0	0	0	0
OTU_169	OTU_169;D_0__Bacteria;D_1__Bacteroidetes;D_2__Bacteroidia;D_3__Bacteroidales;D_4__Prevotellaceae;D_5__Prevotella;D_6__unculturedbacterium	k__Bacteria;p__Bacteroidetes;c__Bacteroidia;o__Bacteroidales;f__Prevotellaceae;g__Prevotella;s__saccharolytica			0.0451282		0.02	0	0	0.08	0	0.02	0	0	0	0	0.14	0	0	0	0	0	0	0.48	0	0.02	0	0	0	0.28	0.02	0	0.14	0.02	0.2	0	0.02	0	0	0	0.14	0.12	0.32	0	0	0	0	0	0
OTU_17	OTU_17;D_0__Bacteria;D_1__Spirochaetae;D_2__Spirochaetes;D_3__Spirochaetales;D_4__Spirochaetaceae;D_5__Treponema;D_6__Treponemalecithinolyticum	k__Bacteria;p__Spirochaetes;c__Spirochaetia;o__Spirochaetales;f__Spirochaetaceae;g__Treponema;s__lecithinolyticum			0.592308		0	0	0	0	0	0	0	0	0	0.02	0.18	0	0	0	0	3.08	2.92	0.34	1.04	0	4.78	2.72	0	0.48	0.4	0	0.02	2.34	0.8	0	1.98	0	0	0	0	0	0.84	0	0	0	0	0	0
OTU_170	OTU_170;D_0__Bacteria;D_1__Bacteroidetes;D_2__Bacteroidia;D_3__Bacteroidales;D_4__Rikenellaceae;D_5__RC9gutgroup;D_6__BacteroidalesoralcloneMCE7_120	k__Bacteria;p__Bacteroidetes;c__Bacteroidetes_[C-1];o__Bacteroidetes_[O-1];f__Bacteroidetes_[F-1];g__Bacteroidetes_[G-3];s__sp._oral_taxon_280			0.00923077		0	0	0	0	0	0	0	0	0.02	0	0	0	0	0	0	0.06	0.06	0	0	0	0	0	0	0	0	0	0	0.08	0	0.04	0	0	0.02	0	0	0	0	0	0	0.06	0	0	0
OTU_171	OTU_171;D_0__Bacteria;D_1__Actinobacteria;D_2__Actinobacteria;D_3__Bifidobacteriales;D_4__Bifidobacteriaceae;D_5__Parascardovia;D_6__ParascardoviadenticolensF0305	k__Bacteria;p__Actinobacteria;c__Actinobacteria;o__Bifidobacteriales;f__Bifidobacteriaceae;g__Parascardovia;s__denticolens			0.0335897		0	0	0	0	0	0	0	0	0	0	0	0.32	0	0	0	0	0	0	0	0	0	0	0	0	0	0	0	0	0.02	0.02	0	1.82	0	0	0	0	0.04	0	0	0	0	0	0
OTU_172	OTU_172;D_0__Bacteria;D_1__Firmicutes;D_2__Clostridia;D_3__Clostridiales;D_4__Peptostreptococcaceae;D_5__IncertaeSedis	k__Bacteria;p__Firmicutes;c__Clostridia;o__Clostridiales;f__Peptostreptococcaceae_[XI];g__Peptostreptococcaceae_[XI][G-7];s__sp._oral_taxon_081			0.01		0	0	0	0	0	0	0	0.02	0	0	0	0	0	0	0	0	0.04	0	0	0	0.1	0	0	0	0.04	0	0	0	0	0	0	0	0	0	0	0	0	0	0	0	0	0	0
OTU_173	OTU_173;D_0__Bacteria;D_1__Bacteroidetes;D_2__Sphingobacteriia;D_3__Sphingobacteriales;D_4__Chitinophagaceae;D_5__Hydrotalea;D_6__unculturedbacterium	k__Bacteria;p__Bacteroidetes;c__Sphingobacteriia;o__Sphingobacteriales;f__Chitinophagaceae;g__Flavitalea;s__sp._oral_taxon_320			0.000512821		0	0	0	0	0	0	0	0	0	0	0	0	0	0	0	0	0	0	0	0	0	0	0	0	0	0	0	0	0	0	0	0	0	0	0	0	0	0	0	0	0	0	0
OTU_174	OTU_174;D_0__Bacteria;D_1__Firmicutes;D_2__Clostridia;D_3__Clostridiales;D_4__vadinBB60;D_5__Clostridialesbacteriumcanineoraltaxon162;D_6__Clostridialesbacteriumcanineoraltaxon162	k__Bacteria;p__Firmicutes;c__Clostridia;o__Clostridiales;f__Clostridiales_[F-1];g__Clostridiales_[F-1][G-1];s__sp._oral_taxon_093			0.00717949		0	0	0	0	0	0	0	0	0.08	0	0	0	0	0	0	0	0	0	0	0	0.1	0	0	0	0.08	0	0	0	0	0	0	0	0	0	0	0	0	0	0	0	0	0	0
OTU_175	OTU_175;D_0__Bacteria;D_1__CandidatedivisionTM7;D_2__unculturedbacterium;D_3__unculturedbacterium;D_4__unculturedbacterium;D_5__unculturedbacterium;D_6__unculturedbacterium	k__Bacteria;p__Saccharibacteria_(TM7);c__TM7_[C-1];o__TM7_[O-1];f__TM7_[F-1];g__TM7_[G-1];s__sp._oral_taxon_346			0.0864103		0.08	0	0	0.38	0	0.08	0.12	0.02	0.04	0	0.06	0	0.24	0.22	0.16	0.08	0	0.32	0	0.04	0	0.16	0	0.16	0.04	0	0	0.06	0.06	0.02	0	0.24	0.02	0.02	0.02	0	0.12	0	0.32	0.18	0	0	0.02
OTU_176	OTU_176;D_0__Bacteria;D_1__Proteobacteria;D_2__Gammaproteobacteria;D_3__Pasteurellales;D_4__Pasteurellaceae;D_5__Aggregatibacter;D_6__	k__Bacteria;p__Proteobacteria;c__Gammaproteobacteria;o__Pasteurellales;f__Pasteurellaceae;g__Aggregatibacter;s__actinomycetemcomitans			0.0858974		0	0	0	0	0	0	0	0	0	0	0	0	2.46	0	0	0	0	0	0	0	0	0	0	0	0	0	0	0	0	0	0	0	0	0	0	0	1.72	0	0	0	0	0.46	0
OTU_177	OTU_177;D_0__Bacteria;D_1__Firmicutes;D_2__Negativicutes;D_3__Selenomonadales;D_4__Veillonellaceae;D_5__Megasphaera;D_6__unculturedbacterium	k__Bacteria;p__Firmicutes;c__Negativicutes;o__Selenomonadales;f__Veillonellaceae;g__Megasphaera;s__micronuciformis			0.0274359		0	0	0	0.02	0	0	0.16	0	0.06	0	0	0.02	0	0	0	0.04	0	0.5	0	0	0.04	0	0	0.06	0	0	0.04	0.06	0	0	0.08	0	0	0	0	0	0	0	0.12	0	0	0	0
OTU_178	OTU_178;D_0__Bacteria;D_1__Proteobacteria;D_2__Alphaproteobacteria;D_3__Rhodospirillales;D_4__Acetobacteraceae	k__Bacteria;p__Proteobacteria;c__Alphaproteobacteria			0.0112821		0	0	0	0	0	0	0	0.04	0	0	0	0	0	0	0.06	0	0.02	0	0.02	0	0	0	0	0	0	0.1	0.48	0	0	0	0	0	0	0.02	0.04	0	0	0	0	0	0.04	0	0.02
OTU_18	OTU_18;D_0__Bacteria;D_1__Proteobacteria;D_2__Betaproteobacteria;D_3__Neisseriales;D_4__Neisseriaceae;D_5__Neisseria;D_6__unculturedbacterium	k__Bacteria;p__Proteobacteria;c__Betaproteobacteria;o__Neisseriales;f__Neisseriaceae;g__Neisseria			1.24718		0.12	1.88	0.98	0.96	1.18	0.52	0.08	3.12	8.58	0.02	0.14	0.02	0	0.04	0.02	0	1.32	3.1	1.04	0.1	0	0	0	0.02	0	0.24	24.92	0.06	0.06	0	0	0	0.26	0	0.9	5.34	0	6.7	0.42	0.18	0.08	0.04	10.18
OTU_180	OTU_180;D_0__Bacteria;D_1__Proteobacteria;D_2__Betaproteobacteria;D_3__Rhodocyclales;D_4__Rhodocyclaceae;D_5__Propionivibrio	k__Bacteria;p__Proteobacteria;c__Betaproteobacteria;o__Burkholderiales;f__Burkholderiaceae;g__Burkholderia;s__cepacia			0.0292308		0	0	0	0	0	0	0.06	0	0	0	0.34	0	0	0	0	0	0	0.08	0	0.16	0.02	0	0	0.08	0	0.44	0.04	0	0.14	0	0	0	0	0	0.12	0	0.04	0.04	0	0	0	0	0
OTU_181	OTU_181;D_0__Bacteria;D_1__Bacteroidetes;D_2__Flavobacteriia;D_3__Flavobacteriales;D_4__Flavobacteriaceae;D_5__Bergeyella;D_6__unculturedbacterium	k__Bacteria;p__Bacteroidetes;c__Flavobacteriia;o__Flavobacteriales;f__Flavobacteriaceae;g__Bergeyella;s__sp._oral_taxon_907			0.0558974		0	0.48	0.38	0.1	0.02	0	0.06	0	0.02	0.08	0.12	0.04	0	0.02	0	0	0	0.22	0	0	0	0	0	0.44	0	0	0	0.06	0.1	0	0	0	0.14	0	0	0.98	0	0	0.06	0	0	0	0.2
OTU_182	OTU_182;D_0__Bacteria;D_1__Bacteroidetes;D_2__Bacteroidia;D_3__Bacteroidales;D_4__Porphyromonadaceae;D_5__Tannerella;D_6__unculturedbacterium	k__Bacteria;p__Bacteroidetes;c__Bacteroidia;o__Bacteroidales;f__Porphyromonadaceae;g__Tannerella;(s__sp._oral_taxon_286/s__sp._oral_taxon_808)			0.348462		0.24	0	0.04	0.66	0	0	0.34	0	0.08	0	1.18	0.04	0.22	0.9	0.12	0.06	0.12	0.48	0.04	0.1	0.22	0.12	0.54	2.28	0	0.02	0.14	0.1	1.22	0.36	1.16	0	0.02	0.4	0.08	0.64	1.48	0.54	1.72	0.32	0	0	0.02
OTU_183	OTU_183;D_0__Bacteria;D_1__Firmicutes;D_2__Bacilli;D_3__Lactobacillales;D_4__Aerococcaceae;D_5__Abiotrophia;D_6__unculturedbacterium	k__Bacteria;p__Firmicutes;c__Bacilli;o__Lactobacillales;f__Aerococcaceae;g__Abiotrophia;s__defectiva			0.0128205		0	0.04	0	0.04	0	0	0	0	0	0	0	0	0	0	0	0	0	0	0	0.02	0	0	0	0	0	0.04	0.2	0	0.02	0	0	0.02	0	0	0	0.04	0	0	0.02	0	0	0	0
OTU_184	OTU_184;D_0__Bacteria;D_1__Firmicutes;D_2__Negativicutes;D_3__Selenomonadales;D_4__Veillonellaceae;D_5__Dialister	k__Bacteria;p__Firmicutes;c__Negativicutes;o__Selenomonadales;f__Veillonellaceae;g__Dialister;s__sp._oral_taxon_119			0.02		0	0	0	0	0	0.3	0	0	0	0	0	0	0	0	0	0.12	0.04	0	0	0	0	0	0	0	0.02	0	0	0	0.02	0	0	0	0	0	0	0	0	0	0	0	0	0	0
OTU_185	OTU_185;D_0__Bacteria;D_1__Firmicutes;D_2__Clostridia;D_3__Clostridiales;D_4__FamilyXIII;D_5__uncultured;D_6__Peptostreptococcaceaebacteriumoraltaxon091	k__Bacteria;p__Firmicutes;c__Clostridia;o__Clostridiales;f__Peptostreptococcaceae_[XI];g__Peptostreptococcaceae_[XI][G-2];s__sp._oral_taxon_091			0.0115385		0	0	0	0	0	0	0	0	0	0	0.04	0.04	0.02	0	0	0.02	0	0	0	0	0	0	0.04	0	0.02	0	0	0	0	0.02	0	0	0	0	0	0	0	0	0	0.04	0	0	0
OTU_187	OTU_187;D_0__Bacteria;D_1__Firmicutes;D_2__Bacilli;D_3__Lactobacillales;D_4__Lactobacillaceae;D_5__Lactobacillus	k__Bacteria;p__Firmicutes;c__Bacilli;o__Lactobacillales;f__Lactobacillaceae;g__Lactobacillus;s__ultunensis			0.0517949		0	0	0	0	0	0	0	0	0	0	0	0	0	0	0	0	0	0	0	0	0	0	0	0	0	0	0	0	0	0.02	0	4.02	0	0	0	0	0	0	0	0	0	0	0
OTU_189	OTU_189;D_0__Bacteria;D_1__Spirochaetae;D_2__Spirochaetes;D_3__Spirochaetales;D_4__Spirochaetaceae;D_5__Treponema;D_6__Treponemasp.Smibert-27:A:D96NR3	k__Bacteria;p__Spirochaetes;c__Spirochaetia;o__Spirochaetales;f__Spirochaetaceae;g__Treponema;s__parvum			0.00717949		0	0	0	0	0	0	0	0	0	0	0	0.02	0.02	0	0	0.02	0	0	0	0	0	0	0	0	0	0	0	0	0	0	0.04	0.06	0	0	0	0	0	0	0	0	0	0	0
OTU_191	OTU_191;D_0__Bacteria;D_1__Firmicutes;D_2__Clostridia;D_3__Clostridiales;D_4__Lachnospiraceae;D_5__Butyrivibrio;D_6__unculturedbacterium	k__Bacteria;p__Firmicutes;c__Clostridia;o__Clostridiales;f__Lachnospiraceae_[XIV];g__Butyrivibrio;s__sp._oral_taxon_080			0.0138462		0	0	0	0	0	0	0	0	0	0	0	0	0	0	0	0	0.04	0	0	0	0	0.8	0	0	0	0	0	0	0	0.02	0	0	0	0	0	0	0	0	0	0	0	0	0
OTU_192	OTU_192;D_0__Bacteria;D_1__Spirochaetae;D_2__Spirochaetes;D_3__Spirochaetales;D_4__Spirochaetaceae;D_5__Treponema;D_6__Treponemasp.9:A:D01	k__Bacteria;p__Spirochaetes;c__Spirochaetia;o__Spirochaetales;f__Spirochaetaceae;g__Treponema;s__sp._oral_taxon_270			0.00487179		0	0	0	0	0	0	0	0	0	0	0.1	0.1	0	0	0	0	0	0	0	0	0	0	0	0	0.06	0	0	0	0	0	0	0	0	0	0	0	0	0	0	0	0	0	0
OTU_195	OTU_195;D_0__Bacteria;D_1__BD1-5	k__Bacteria;p__Gracilibacteria_(GN02);c__GN02_[C-1];o__GN02_[O-1];f__GN02_[F-1];g__GN02_[G-1];s__sp._oral_taxon_871			0.0125641		0	0	0	0	0	0	0	0	0	0	0	0	0	0	0	0	0	0	0	0	0	0	0	0	0	0	0	0	0	0	0	0	0	0	0	0	0	0	0	0	0	0	0.9
OTU_197	OTU_197;D_0__Bacteria;D_1__Firmicutes;D_2__Clostridia;D_3__Clostridiales;D_4__Lachnospiraceae;D_5__Shuttleworthia;D_6__Shuttleworthiasp.oraltaxonG69	k__Bacteria;p__Firmicutes;c__Clostridia;o__Clostridiales;f__Lachnospiraceae_[XIV];g__Shuttleworthia;s__satelles			0.0261538		0	0	0	0	0	0	0.02	0	0	0	0	0	0.04	0	0	0	0	0.04	0	0	0.02	0	0.08	0	0	0	0	0.06	0	0.04	0.1	0	0	0	0	0	0	0	0	0.04	0	0	0
OTU_198	OTU_198;D_0__Bacteria;D_1__Bacteroidetes;D_2__Bacteroidia;D_3__Bacteroidales;D_4__Rikenellaceae;D_5__RC9gutgroup;D_6__unculturedeubacteriumE1-K10	k__Bacteria;p__Bacteroidetes;c__Bacteroidetes_[C-1];o__Bacteroidetes_[O-1];f__Bacteroidetes_[F-1];g__Bacteroidetes_[G-3];s__sp._oral_taxon_503			0.00769231		0	0	0	0	0	0	0	0	0	0	0	0	0	0	0	0	0	0	0	0	0	0	0	0	0	0	0	0	0	0	0	0	0	0	0	0	0	0	0	0	0	0	0
OTU_199	OTU_199;D_0__Bacteria;D_1__Proteobacteria;D_2__Gammaproteobacteria;D_3__Legionellales;D_4__Coxiellaceae;D_5__Aquicella	k__Bacteria;p__Proteobacteria;c__Gammaproteobacteria;o__Pseudomonadales			0.00179487		0	0	0	0	0	0	0	0	0	0	0	0	0	0	0	0	0	0	0	0	0	0	0	0	0	0	0	0	0	0	0	0	0	0	0	0	0	0	0	0	0	0	0
OTU_2	OTU_2;D_0__Bacteria;D_1__Actinobacteria;D_2__Actinobacteria;D_3__Corynebacteriales;D_4__Corynebacteriaceae;D_5__Corynebacterium	k__Bacteria;p__Actinobacteria;c__Actinobacteria;o__Corynebacteriales;f__Corynebacteriaceae;g__Corynebacterium;s__matruchotii			7.28667		9.78	19.28	26.7	2.26	0	0.76	5.6	11.54	26.32	9	16.44	6.58	1.7	8.08	1.46	2.28	0.02	6.28	12.14	1.28	0.16	0	7.28	13.22	0.22	9.34	0.26	4.76	2.58	3.5	1.62	1.68	9.32	16.08	5.26	24.44	10.84	4.66	5.12	10.44	7.52	3.34	22.66
OTU_20	OTU_20;D_0__Bacteria;D_1__Bacteroidetes;D_2__Bacteroidia;D_3__Bacteroidales;D_4__Prevotellaceae;D_5__Alloprevotella;D_6__unculturedbacterium	k__Bacteria;p__Bacteroidetes;c__Bacteroidia;o__Bacteroidales;f__Prevotellaceae;g__Alloprevotella;s__tannerae			2.34359		11.02	0	0.02	9.04	0	8.64	2.6	0.36	1.84	0	8.2	10.06	0	0	0	2.18	1.18	1.12	0.12	0.56	8.06	0	0	2.14	0.76	0	0	1.34	2.22	0	6.94	1.6	0.48	0	0.06	0	1.5	0	0	4.9	0	0	0
OTU_200	OTU_200;D_0__Bacteria;D_1__Bacteroidetes;D_2__Bacteroidia;D_3__Bacteroidales;D_4__Prevotellaceae;D_5__Prevotella	k__Bacteria;p__Bacteroidetes;c__Bacteroidia;o__Bacteroidales;f__Prevotellaceae;g__Prevotella;s__salivae			0.184872		0	0	0	0.14	0	0	0.1	0	0	2.96	0.06	0.18	0.06	0.96	0.82	0	0	0.78	0	0	0	0	1.74	0	0.02	0	0.14	0.46	0	0.02	0.36	0.14	0.84	0	0	0	0.06	0	0.06	0	0	0	0.02
OTU_201	OTU_201;D_0__Bacteria;D_1__Firmicutes;D_2__Clostridia;D_3__Clostridiales;D_4__FamilyXIII;D_5__IncertaeSedis;D_6__[Eubacterium]nodatum	k__Bacteria;p__Firmicutes;c__Clostridia;o__Clostridiales;f__Peptostreptococcaceae_[XI];g__Peptostreptococcaceae_[XI][G-6];s__[Eubacterium]_nodatum			0.00205128		0	0	0	0	0	0	0	0	0	0	0	0	0	0	0	0	0	0	0	0	0	0	0	0	0.1	0	0	0	0	0	0	0	0	0	0	0	0	0	0	0.02	0	0	0
OTU_202	OTU_202;D_0__Bacteria;D_1__Firmicutes;D_2__Clostridia;D_3__Clostridiales;D_4__Ruminococcaceae;D_5__uncultured;D_6__	k__Bacteria;p__Firmicutes;c__Clostridia;o__Clostridiales;f__Ruminococcaceae;g__Ruminococcaceae_[G-2];s__sp._oral_taxon_085			0.00666667		0	0	0	0	0	0	0.02	0	0	0	0	0	0	0	0	0	0	0.04	0	0	0	0	0	0.1	0	0	0.1	0	0.04	0	0	0	0	0	0	0.04	0	0	0	0	0	0	0
OTU_203	OTU_203;D_0__Bacteria;D_1__Bacteroidetes;D_2__Bacteroidia;D_3__Bacteroidales;D_4__Prevotellaceae;D_5__Prevotella;D_6__unculturedbacterium	k__Bacteria;p__Bacteroidetes;c__Bacteroidia;o__Bacteroidales;f__Prevotellaceae;g__Prevotella;s__sp._oral_taxon_475			0.00179487		0	0	0	0	0	0	0	0	0	0	0	0	0	0	0	0	0	0	0	0	0	0	0	0	0	0	0.1	0	0	0	0	0	0	0	0	0	0	0	0	0	0	0	0
OTU_204	OTU_204;D_0__Bacteria;D_1__Fusobacteria;D_2__Fusobacteriia;D_3__Fusobacteriales;D_4__Leptotrichiaceae;D_5__Leptotrichia;D_6__unculturedbacterium	k__Bacteria;p__Fusobacteria;c__Fusobacteriia;o__Fusobacteriales;f__Leptotrichiaceae;g__Leptotrichia;s__sp._oral_taxon_221			0.0182051		0	0	0.04	0	0	0	0	0	0	0.06	0.54	0.08	0	0	0.04	0	0	0.02	0	0	0	0	0.1	0	0	0	0	0	0	0	0	0	0	0.04	0	0	0	0	0.02	0	0	0	0
OTU_205	OTU_205;D_0__Bacteria;D_1__Firmicutes;D_2__Clostridia;D_3__Clostridiales;D_4__FamilyXI;D_5__Peptoniphilus	k__Bacteria;p__Firmicutes;c__Clostridia;o__Clostridiales;f__Peptoniphilaceae;g__Peptoniphilus;s__lacrimalis			0.01		0	0	0	0	0	0	0	0	0	0	0	0	0	0	0	0	0	0	0	0	0	0.08	0.14	0	0	0	0	0	0	0.1	0	0	0	0	0	0	0	0	0	0	0	0	0
OTU_206	OTU_206;D_0__Bacteria;D_1__Proteobacteria;D_2__Betaproteobacteria;D_3__Burkholderiales;D_4__Burkholderiaceae;D_5__Burkholderia;D_6__	k__Bacteria;p__Proteobacteria;c__Betaproteobacteria;o__Burkholderiales;f__Burkholderiaceae;g__Burkholderia;s__cepacia			0.000512821		0	0	0	0	0	0	0	0	0	0	0	0	0	0	0	0	0	0	0	0	0	0	0	0	0	0.02	0	0	0	0	0	0	0	0	0	0	0	0	0	0	0	0	0
OTU_208	OTU_208;D_0__Bacteria;D_1__Bacteroidetes;D_2__Bacteroidia;D_3__Bacteroidales;D_4__Prevotellaceae;D_5__Alloprevotella	k__Bacteria;p__Bacteroidetes;c__Bacteroidia;o__Bacteroidales;f__Prevotellaceae;g__Alloprevotella			0.00794872		0	0	0.06	0.06	0	0	0	0	0	0	0	0	0	0	0	0.06	0	0.02	0	0	0	0	0	0.02	0	0	0.02	0	0	0	0	0	0	0	0	0	0	0	0.02	0	0	0	0
OTU_209	OTU_209;D_0__Bacteria;D_1__Bacteroidetes;D_2__Bacteroidia;D_3__Bacteroidales;D_4__Prevotellaceae;D_5__Alloprevotella	k__Bacteria;p__Bacteroidetes;c__Bacteroidia;o__Bacteroidales;f__Prevotellaceae;g__Alloprevotella			0.0179487		0.06	0	0	0.5	0	0	0.04	0	0	0	0	0	0	0	0	0	0	0.02	0	0	0	0	0	0	0	0	0.38	0	0.04	0	0	0	0	0	0.04	0	0	0	0	0	0	0	0
OTU_21	OTU_21;D_0__Bacteria;D_1__Bacteroidetes;D_2__Bacteroidia;D_3__Bacteroidales;D_4__Prevotellaceae;D_5__Prevotella;D_6__	k__Bacteria;p__Bacteroidetes;c__Bacteroidia;o__Bacteroidales;f__Prevotellaceae;g__Prevotella;s__pleuritidis			1.23897		0	0	0	0	0	0	0	0.14	1.7	0	0.1	0.62	0	0.42	0	0	0.06	2.24	0.42	1.04	0	6.04	3.9	0.06	6.04	0	0.04	0.44	0.12	2.38	4.04	0	0	0	0	0	0	0.02	5.74	0	0.06	0	0
OTU_212	OTU_212;D_0__Bacteria;D_1__Firmicutes;D_2__Clostridia;D_3__Clostridiales;D_4__FamilyXI;D_5__uncultured;D_6__	k__Bacteria;p__Firmicutes;c__Clostridia;o__Clostridiales;f__Peptoniphilaceae;g__Peptoniphilaceae_[G-1];s__sp._oral_taxon_113			0.00333333		0.02	0	0	0	0	0	0	0	0	0	0	0	0	0	0	0	0	0	0	0	0	0	0	0	0	0	0	0	0	0	0	0	0	0	0	0	0	0	0	0	0	0	0
OTU_214	OTU_214;D_0__Bacteria;D_1__Actinobacteria;D_2__Coriobacteriia;D_3__Coriobacteriales;D_4__Coriobacteriaceae;D_5__Cryptobacterium;D_6__CryptobacteriumcurtumDSM15641	k__Bacteria;p__Actinobacteria;c__Coriobacteriia;o__Eggerthellales;f__Eggerthellaceae;g__Cryptobacterium;s__curtum			0.00897436		0	0	0	0	0	0	0.02	0	0	0	0	0.02	0	0	0.06	0	0	0.02	0	0	0	0	0	0	0	0	0	0.02	0.04	0	0.1	0	0	0	0	0	0	0	0.02	0	0	0.04	0
OTU_217	OTU_217;D_0__Bacteria;D_1__Bacteroidetes;D_2__Sphingobacteriia;D_3__Sphingobacteriales;D_4__Chitinophagaceae;D_5__Sediminibacterium;D_6__	k__Bacteria;p__Bacteroidetes;c__Sphingobacteriia;o__Sphingobacteriales;f__Chitinophagaceae;g__Flavitalea;s__sp._oral_taxon_320			0.00025641		0	0	0	0	0	0	0	0	0	0	0	0	0	0	0	0	0	0	0	0	0	0	0.02	0	0	0	0	0	0	0	0	0	0	0	0	0	0	0	0	0	0	0	0
OTU_218	OTU_218;D_0__Bacteria;D_1__Firmicutes;D_2__Bacilli;D_3__Lactobacillales;D_4__Lactobacillaceae;D_5__Lactobacillus;D_6__unculturedLactobacillaceaebacterium	k__Bacteria;p__Firmicutes;c__Bacilli;o__Lactobacillales;f__Lactobacillaceae;g__Lactobacillus;s__gasseri			0.00846154		0	0	0	0	0	0	0	0	0	0	0	0	0	0	0	0	0	0	0	0	0	0	0	0	0	0	0	0	0	0	0	0.62	0	0	0	0	0	0	0	0	0	0	0
OTU_219	OTU_219;D_0__Bacteria;D_1__Fusobacteria;D_2__Fusobacteriia;D_3__Fusobacteriales;D_4__Leptotrichiaceae;D_5__Leptotrichia;D_6__Leptotrichiasp.'OralTaxon847'	k__Bacteria;p__Fusobacteria;c__Fusobacteriia;o__Fusobacteriales;f__Leptotrichiaceae;g__Leptotrichia;s__sp._oral_taxon_847			0.00641026		0	0	0	0	0	0	0.08	0	0	0	0	0	0	0	0	0	0	0	0	0	0	0	0	0	0	0	0	0	0	0	0	0	0	0	0	0	0	0	0	0	0	0	0
OTU_22	OTU_22;D_0__Bacteria;D_1__Actinobacteria;D_2__Actinobacteria;D_3__Actinomycetales;D_4__Actinomycetaceae;D_5__Actinomyces	k__Bacteria;p__Actinobacteria;c__Actinobacteria;o__Actinomycetales;f__Actinomycetaceae;g__Actinomyces;(s__naeslundii/s__oris/s__sp._oral_taxon_169/s__sp._oral_taxon_171/s__sp._oral_taxon_175)			2.9241		1.44	1.34	7.54	0.14	4.58	0.48	1	14.78	4.2	3.22	2.98	2	0.26	1.3	7.44	0.14	1.34	1.14	14.34	5.2	0.26	0.18	0.64	1.64	0.2	10.02	0.7	0.16	0.28	1.74	3.52	2.02	0.52	21.2	6.5	14.36	4.52	5.68	3.9	1.5	17.24	3.78	1.76
OTU_221	OTU_221;D_0__Bacteria	k__Bacteria			0.0148718		0	0	0	0	0	0	0	0	0	0	0	0.02	0.1	0.08	0	0.06	0.02	0	0	0	0	0.02	0.02	0	0	0	0	0.02	0.02	0	0	0.02	0	0	0.1	0	0.04	0	0	0	0	0	0
OTU_222	OTU_222;D_0__Bacteria;D_1__Proteobacteria;D_2__Gammaproteobacteria;D_3__Cardiobacteriales;D_4__Cardiobacteriaceae;D_5__Cardiobacterium	k__Bacteria;p__Proteobacteria;c__Gammaproteobacteria;o__Cardiobacteriales;f__Cardiobacteriaceae;g__Cardiobacterium;s__valvarum			0.205128		0.04	1.66	0.1	0.18	0	0	0.08	0.06	0	0	0.32	0	0.04	0.2	0.02	0.32	0	0.26	0.36	0.24	0	0	0	0.2	0	0.36	1.18	0.12	0.36	0	0	0.04	0.12	0.3	0.36	0.32	0.36	2.34	0	0	0	0	1.14
OTU_224	OTU_224;D_0__Bacteria;D_1__Proteobacteria;D_2__Gammaproteobacteria;D_3__Xanthomonadales;D_4__Nevskiaceae;D_5__Alkanibacter;D_6__gammaproteobacteriumW1.09-152	k__Bacteria			0.00025641		0	0	0	0	0	0	0	0	0	0	0	0	0	0	0	0	0	0	0	0	0	0	0	0	0	0	0	0	0	0	0	0	0	0	0	0	0	0	0	0	0	0	0
OTU_225	OTU_225;D_0__Bacteria;D_1__Tenericutes;D_2__Mollicutes;D_3__RF9;D_4__unculturedbacterium;D_5__unculturedbacterium;D_6__unculturedbacterium	k__Bacteria			0.00487179		0	0	0	0.2	0	0	0.02	0	0	0	0	0	0	0	0	0	0	0.02	0	0	0	0	0	0.04	0	0	0	0	0	0	0	0	0	0	0	0	0.06	0	0	0	0	0	0
OTU_228	OTU_228;D_0__Bacteria;D_1__Actinobacteria;D_2__Coriobacteriia;D_3__Coriobacteriales;D_4__Coriobacteriaceae;D_5__Slackia;D_6__SlackiaexiguaATCC700122	k__Bacteria;p__Actinobacteria;c__Coriobacteriia;o__Coriobacteriales;f__Coriobacteriaceae;g__Slackia;s__exigua			0.00435897		0	0	0	0	0	0.02	0	0	0	0	0	0	0	0.02	0	0	0	0	0	0	0	0	0	0	0.02	0	0	0	0	0	0	0	0	0	0.02	0	0	0	0	0	0	0	0
OTU_229	OTU_229;D_0__Bacteria;D_1__Bacteroidetes;D_2__Bacteroidia;D_3__Bacteroidales;D_4__Prevotellaceae;D_5__Prevotella;D_6__Prevotellasp.P2A_FAAD4	k__Bacteria;p__Bacteroidetes;c__Bacteroidia;o__Bacteroidales;f__Prevotellaceae;g__Prevotella;s__sp._oral_taxon_820			0.00948718		0	0	0	0	0	0	0	0	0	0	0	0	0	0	0	0	0	0	0	0	0	0	0	0	0	0	0	0	0	0	0	0	0	0	0	0	0	0	0	0	0	0	0
OTU_23	OTU_23;D_0__Bacteria;D_1__Bacteroidetes;D_2__Bacteroidia;D_3__Bacteroidales;D_4__Prevotellaceae;D_5__Prevotella	k__Bacteria;p__Bacteroidetes;c__Bacteroidia;o__Bacteroidales;f__Prevotellaceae;g__Prevotella;s__denticola			1.24462		0	0	0	0.04	0	0	3.66	0	1.58	0	0.02	1.18	0	0	1.8	6.18	0.22	7.42	0	0.02	1.6	0	7.9	0	0.02	0	0.04	2.76	1.2	4.34	1.48	1.04	2.66	0	0	0.1	0.04	0	0.14	0	0	0.06	0.02
OTU_230	OTU_230;D_0__Bacteria;D_1__Bacteroidetes;D_2__Sphingobacteriia;D_3__Sphingobacteriales;D_4__WCHB1-69;D_5__unculturedbacterium;D_6__unculturedbacterium	k__Bacteria			0.00564103		0	0	0	0	0	0	0	0	0	0	0	0	0	0	0	0	0	0	0	0	0	0	0	0	0	0	0	0	0	0	0	0	0	0	0	0	0	0	0	0	0	0	0
OTU_231	OTU_231;D_0__Bacteria;D_1__Spirochaetae;D_2__Spirochaetes;D_3__Spirochaetales;D_4__Spirochaetaceae;D_5__Treponema;D_6__Treponemasp.PT9	k__Bacteria;p__Spirochaetes;c__Spirochaetia;o__Spirochaetales;f__Spirochaetaceae;g__Treponema			0.00282051		0	0	0	0	0	0	0	0	0	0	0	0	0	0	0	0	0	0	0	0	0	0	0	0	0	0	0	0	0	0	0	0	0	0	0	0	0	0	0	0	0	0	0
OTU_232	OTU_232;D_0__Bacteria;D_1__Firmicutes;D_2__Bacilli;D_3__Lactobacillales;D_4__Streptococcaceae;D_5__Streptococcus;D_6__	k__Bacteria;p__Firmicutes;c__Bacilli;o__Lactobacillales;f__Streptococcaceae;g__Streptococcus;s__sanguinis			0.618718		0.08	0.7	0.9	0.1	0.08	0.12	0.12	6.42	2.1	0.08	0.06	0.86	0	0.04	0.1	0.18	1.94	0.04	3.1	9.66	0.04	0.02	0.04	0.28	0	0.6	0.98	0	0.22	0.04	0.02	0.26	0.28	0.28	1.16	0.86	0.02	0.7	0.02	0.02	1.24	0.48	1.2
OTU_234	OTU_234;D_0__Bacteria;D_1__Proteobacteria;D_2__Alphaproteobacteria;D_3__Rhodospirillales;D_4__Acetobacteraceae;D_5__Roseomonas	k__Bacteria;p__Proteobacteria;c__Alphaproteobacteria			0.00179487		0	0	0	0	0	0	0	0	0	0	0	0	0	0	0.04	0	0.02	0	0.02	0	0	0	0	0	0	0.02	0.02	0	0	0	0	0	0	0	0	0	0	0	0	0	0.02	0	0
OTU_235	OTU_235;D_0__Bacteria;D_1__Firmicutes;D_2__Erysipelotrichia;D_3__Erysipelotrichales;D_4__Erysipelotrichaceae;D_5__uncultured	k__Bacteria;p__Firmicutes;c__Erysipelotrichia;o__Erysipelotrichales;f__Erysipelotrichaceae;g__Erysipelotrichaceae_[G-1];s__sp._oral_taxon_905			0.00615385		0	0	0	0	0	0	0.02	0	0	0	0	0	0.06	0	0	0.02	0	0	0	0	0	0	0	0.02	0	0	0	0	0	0	0	0	0	0	0	0	0	0	0	0.06	0	0	0
OTU_236	OTU_236;D_0__Bacteria;D_1__Proteobacteria;D_2__Alphaproteobacteria;D_3__Sphingomonadales;D_4__Sphingomonadaceae;D_5__Sphingomonas	k__Bacteria;p__Proteobacteria;c__Alphaproteobacteria;o__Sphingomonadales;f__Sphingomonadaceae;g__Sphingomonas;s__echinoides			0.00435897		0	0	0	0	0	0	0	0.02	0	0	0.02	0	0	0	0.04	0	0	0	0	0	0	0	0	0.02	0	0	0.18	0	0	0	0	0	0	0	0.02	0	0	0	0	0	0	0	0
OTU_237	OTU_237;D_0__Bacteria;D_1__Firmicutes;D_2__Negativicutes;D_3__Selenomonadales;D_4__Veillonellaceae;D_5__Selenomonas	k__Bacteria;p__Firmicutes;c__Negativicutes;o__Selenomonadales;f__Veillonellaceae;g__Selenomonas			0.222821		0.04	0	0.04	0.06	0	1.18	0.42	0.02	0	0.02	0.02	0.02	0	0.5	0.96	0.2	0	0.22	0	0.06	0.02	0	0.44	0	0	0.02	0.02	0.62	0.4	0.02	0.06	0	0.72	0	0.18	0	0.42	0	0.06	0	0	0.08	0
OTU_238	OTU_238;D_0__Bacteria;D_1__Firmicutes;D_2__Clostridia;D_3__Clostridiales;D_4__Lachnospiraceae;D_5__Stomatobaculum;D_6__unculturedbacterium	k__Bacteria;p__Firmicutes;c__Clostridia;o__Clostridiales;f__Lachnospiraceae_[XIV];g__Stomatobaculum;s__sp._oral_taxon_097			0.00435897		0	0.28	0.02	0	0	0	0	0	0	0	0	0	0	0	0	0	0	0	0	0	0	0	0	0	0	0	0	0	0	0	0	0	0	0	0	0.02	0	0	0	0	0	0	0
OTU_239	OTU_239;D_0__Bacteria;D_1__Fusobacteria;D_2__Fusobacteriia;D_3__Fusobacteriales;D_4__Fusobacteriaceae;D_5__Fusobacterium	k__Bacteria;p__Fusobacteria;c__Fusobacteriia;o__Fusobacteriales;f__Fusobacteriaceae;g__Fusobacterium			0.149487		0.08	0	0	0.22	0	0.24	0.3	0	0.02	0.02	0.1	0.24	0.12	0.24	0.16	0.3	0.14	0.12	0	0.04	0.32	0.2	0.34	0.04	0.5	0.06	0.12	0.34	0.2	0.24	0.32	0.12	0.08	0	0.12	0.04	0.04	0.02	0.24	0.32	0	0.04	0.02
OTU_24	OTU_24;D_0__Bacteria;D_1__Synergistetes;D_2__Synergistia;D_3__Synergistales;D_4__Synergistaceae;D_5__Fretibacterium;D_6__unculturedDeferribacteraceaebacterium	k__Bacteria;p__Synergistetes;c__Synergistia;o__Synergistales;f__Synergistaceae;g__Fretibacterium;s__fastidiosum			0.954872		0	0	0	0.44	0	0	0.1	0.02	1.36	0.54	0.66	0.18	4.54	0.02	0	2.14	0.94	0.06	0	0.12	3.4	1.26	2.18	0.08	1.88	0	0.02	0.08	2.72	1.84	0.08	0.7	0.04	0	0.38	0	0.1	0	0	0.7	0	0	0
OTU_240	OTU_240;D_0__Bacteria;D_1__Firmicutes;D_2__Clostridia;D_3__Clostridiales;D_4__Lachnospiraceae;D_5__Oribacterium;D_6__unculturedbacterium	k__Bacteria;p__Firmicutes;c__Clostridia;o__Clostridiales;f__Lachnospiraceae_[XIV];g__Oribacterium			0.00615385		0	0	0	0	0	0	0	0	0	0	0	0	0	0	0	0	0	0	0	0	0	0	0	0	0	0	0	0	0	0	0	0	0	0	0	0	0	0	0	0	0	0	0
OTU_243	OTU_243;D_0__Bacteria;D_1__Firmicutes;D_2__Bacilli;D_3__Lactobacillales;D_4__Streptococcaceae;D_5__Streptococcus	k__Bacteria;p__Firmicutes;c__Bacilli;o__Lactobacillales;f__Streptococcaceae;g__Streptococcus;(s__salivarius/s__vestibularis)			0.0217949		0	0	0.2	0	0.02	0	0	0.08	0.04	0	0	0.02	0	0	0.04	0	0	0	0.04	0.16	0.02	0	0	0	0	0	0	0	0	0.02	0	0	0.02	0	0.06	0	0	0.04	0	0	0.02	0.02	0.18
OTU_245	OTU_245;D_0__Bacteria;D_1__Firmicutes;D_2__Negativicutes;D_3__Selenomonadales;D_4__Veillonellaceae;D_5__Veillonella;D_6__unculturedbacterium	k__Bacteria;p__Firmicutes;c__Negativicutes;o__Selenomonadales;f__Veillonellaceae;g__Veillonella;s__parvula			1.72923		1.14	3.02	8.32	0.14	8.14	2.84	1.46	3.7	0.02	7.8	2.34	8.44	0.08	0.16	9.06	0.08	1.52	0.12	0.04	0.4	0.82	0.02	0.5	3.52	0.14	8.28	0.96	0	0.14	11.62	0.02	1.48	1.38	0.38	0.24	0.62	0.14	3.9	0.4	0.38	6.2	14.14	0.16
OTU_248	OTU_248;D_0__Bacteria;D_1__Actinobacteria;D_2__Actinobacteria;D_3__Actinomycetales;D_4__Actinomycetaceae;D_5__Actinomyces;D_6__	k__Bacteria;p__Actinobacteria;c__Actinobacteria;o__Actinomycetales;f__Actinomycetaceae;g__Actinomyces;s__sp._oral_taxon_414			0.112051		0	0	0	0.02	0	0	0.04	0	0.02	0.12	0	0	0.08	0.08	0.06	0	0	0.04	0	0.7	0.1	0	0.04	0.82	0	0.04	0.02	0.02	0.68	0	0	0	0.08	0	0	0.08	0.68	0	0.04	0	0	0	0.02
OTU_249	OTU_249;D_0__Bacteria;D_1__Bacteroidetes;D_2__Bacteroidia;D_3__Bacteroidales;D_4__Prevotellaceae;D_5__Alloprevotella;D_6__Prevotellasp.oralcloneASCD07	k__Bacteria;p__Bacteroidetes;c__Bacteroidia;o__Bacteroidales;f__Prevotellaceae;g__Alloprevotella;s__sp._oral_taxon_473			0.00435897		0	0	0	0	0	0	0	0	0	0	0	0	0	0	0	0	0	0	0	0	0	0	0	0	0	0	0	0	0	0	0	0	0	0	0	0	0	0	0	0	0	0	0
OTU_25	OTU_25;D_0__Bacteria;D_1__Bacteroidetes;D_2__Bacteroidia;D_3__Bacteroidales;D_4__Prevotellaceae;D_5__Prevotella;D_6__	k__Bacteria;p__Bacteroidetes;c__Bacteroidia;o__Bacteroidales;f__Prevotellaceae;g__Prevotella;s__intermedia			0.765385		0	0	0	0	0	0	0	0.02	0	0.04	0	0	0	0	0	0	3.88	0	0	0	3.22	1.32	0	2.5	28.94	0	0	0	0	0	0	0	0	0	0	0	0	0	0	9.84	0	0	0
OTU_250	OTU_250;D_0__Bacteria;D_1__Firmicutes;D_2__Erysipelotrichia;D_3__Erysipelotrichales;D_4__Erysipelotrichaceae;D_5__Eggerthia;D_6__EggerthiacatenaformisOT569=DSM20559	k__Bacteria;p__Firmicutes;c__Erysipelotrichia;o__Erysipelotrichales;f__Erysipelotrichaceae;g__Eggerthia;s__catenaformis			0.00615385		0	0	0	0	0	0	0	0	0	0	0	0	0	0	0	0	0.02	0	0	0	0	0	0	0	0	0	0	0.08	0	0	0	0	0	0	0	0	0	0	0	0.08	0	0	0
OTU_253	OTU_253;D_0__Bacteria;D_1__Proteobacteria;D_2__Gammaproteobacteria;D_3__Pasteurellales;D_4__Pasteurellaceae;D_5__Aggregatibacter;D_6__unculturedbacterium	k__Bacteria;p__Proteobacteria;c__Gammaproteobacteria;o__Pasteurellales;f__Pasteurellaceae;g__Aggregatibacter;(s__segnis/s__sp._oral_taxon_458/s__sp._oral_taxon_512)			0.291538		0	0.4	0.22	1.38	0.04	0	0.24	1.36	0	0	0.04	0	0	0.02	0.02	0.48	0	0.2	0.12	0	0	0	0	0.88	0	0.64	0.04	0	0.26	0	0	0	0	0.02	0	0.7	0.22	0.16	0.7	0.04	0	0	6.24
OTU_254	OTU_254;D_0__Bacteria;D_1__Proteobacteria;D_2__Betaproteobacteria;D_3__Burkholderiales;D_4__Comamonadaceae;D_5__Comamonas;D_6__	k__Bacteria;p__Proteobacteria;c__Betaproteobacteria;o__Burkholderiales;f__Comamonadaceae;g__Ottowia;s__sp._oral_taxon_894			0.00769231		0	0.2	0	0	0	0	0	0	0	0	0	0	0	0	0	0	0	0.24	0	0	0	0	0	0	0	0	0.02	0	0	0	0	0	0	0	0	0	0	0	0	0	0	0	0
OTU_255	OTU_255;D_0__Bacteria;D_1__Firmicutes;D_2__Clostridia;D_3__Clostridiales;D_4__Lachnospiraceae;D_5__Howardella;D_6__unculturedbacterium	k__Bacteria;p__Firmicutes;c__Clostridia;o__Clostridiales;f__Lachnospiraceae_[XIV];g__Lachnospiraceae_[G-7];s__sp._oral_taxon_086			0.00358974		0	0	0	0	0	0	0	0	0	0	0	0.02	0	0	0	0	0	0.02	0	0	0	0	0	0	0	0	0	0.02	0	0	0	0	0	0	0	0	0	0	0	0.02	0	0	0
OTU_256	OTU_256;D_0__Bacteria;D_1__Proteobacteria;D_2__Gammaproteobacteria;D_3__Enterobacteriales;D_4__Enterobacteriaceae;D_5__Escherichia-Shigella;D_6__Escherichiacoli	k__Bacteria;p__Proteobacteria;c__Gammaproteobacteria;o__Enterobacteriales;f__Enterobacteriaceae;g__Escherichia;s__coli			0.00025641		0	0	0	0	0	0	0	0	0	0	0	0	0	0	0	0	0	0	0	0	0	0	0	0	0	0	0	0	0	0	0	0	0	0	0	0	0	0	0	0	0	0	0
OTU_257	OTU_257;D_0__Bacteria;D_1__Firmicutes;D_2__Clostridia;D_3__Clostridiales;D_4__Lachnospiraceae;D_5__Lachnoanaerobaculum;D_6__Eubacteriumsp.oralcloneJI012	k__Bacteria;p__Firmicutes;c__Clostridia;o__Clostridiales;f__Lachnospiraceae_[XIV];g__Lachnoanaerobaculum;s__sp._oral_taxon_496			0.000769231		0	0	0	0	0	0	0	0	0	0	0	0	0	0	0	0	0	0	0	0	0	0	0	0	0	0	0	0	0	0	0	0	0	0	0	0	0	0	0	0	0	0	0
OTU_259	OTU_259;D_0__Bacteria;D_1__Bacteroidetes;D_2__Bacteroidia;D_3__Bacteroidales;D_4__Prevotellaceae;D_5__Prevotella	k__Bacteria;p__Bacteroidetes;c__Bacteroidia;o__Bacteroidales;f__Prevotellaceae;g__Prevotella			0.00512821		0	0	0	0	0	0	0	0	0	0	0	0	0	0	0	0	0	0	0	0	0	0	0	0	0	0	0	0.02	0	0	0	0	0	0	0	0	0	0	0	0	0	0	0
OTU_26	OTU_26;D_0__Bacteria;D_1__Proteobacteria;D_2__Gammaproteobacteria;D_3__Pasteurellales;D_4__Pasteurellaceae;D_5__Haemophilus;D_6__unculturedbacterium	k__Bacteria;p__Proteobacteria;c__Gammaproteobacteria;o__Pasteurellales;f__Pasteurellaceae;g__Haemophilus			0.567692		0	0.86	0.44	0.4	0.26	0.02	0.3	16.12	0.04	0.08	0.06	0.3	0.02	0	0.04	0.28	0.56	0.18	1.22	1.98	0.02	0	0.08	0.08	0.02	3.48	0.28	0.06	0.02	0.04	0	0	0.34	0	0.06	1.22	0.02	0.78	0.4	0.04	1.38	0	4.16
OTU_260	OTU_260;D_0__Bacteria;D_1__Bacteroidetes;D_2__Bacteroidia;D_3__Bacteroidales;D_4__Prevotellaceae;D_5__Prevotella;D_6__	k__Bacteria;p__Bacteroidetes;c__Bacteroidia;o__Bacteroidales;f__Prevotellaceae;g__Prevotella;s__nanceiensis			0.00205128		0	0.02	0.02	0	0	0	0	0	0	0.02	0	0	0	0	0	0	0	0	0.02	0	0	0	0	0	0	0	0	0	0	0	0	0	0	0	0	0	0	0	0	0	0	0	0
OTU_263	OTU_263;D_0__Bacteria;D_1__Spirochaetae;D_2__Spirochaetes;D_3__Spirochaetales;D_4__Spirochaetaceae;D_5__Treponema	k__Bacteria;p__Spirochaetes;c__Spirochaetia;o__Spirochaetales;f__Spirochaetaceae;g__Treponema			0.0105128		0	0	0	0	0	0	0	0	0	0	0	0	0	0	0	0.02	0.04	0	0	0	0	0.7	0	0	0	0	0	0	0	0	0	0	0	0	0	0	0	0	0	0	0	0	0
OTU_265	OTU_265;D_0__Bacteria;D_1__Bacteroidetes;D_2__Sphingobacteriia;D_3__Sphingobacteriales;D_4__WCHB1-69;D_5__Bacteroidalesgenomosp.P3oralcloneMB1_G34;D_6__Bacteroidalesgenomosp.P3oralcloneMB1_G34	k__Bacteria;p__Bacteroidetes;c__Bacteroidetes_[C-1];o__Bacteroidetes_[O-1];f__Bacteroidetes_[F-1];g__Bacteroidetes_[G-5];s__sp._oral_taxon_505			0.00846154		0	0	0	0	0	0	0	0	0	0	0	0	0	0	0	0	0.48	0	0	0	0	0	0	0	0	0	0	0	0	0	0	0	0	0	0	0	0	0	0	0	0	0	0
OTU_266	OTU_266;D_0__Bacteria;D_1__Firmicutes;D_2__Bacilli;D_3__Lactobacillales;D_4__Lactobacillaceae;D_5__Lactobacillus	k__Bacteria;p__Firmicutes;c__Bacilli;o__Lactobacillales;f__Lactobacillaceae;g__Lactobacillus;s__paracasei			0.00769231		0	0	0	0	0.02	0.04	0	0	0	0	0	0.02	0	0	0	0	0	0	0	0	0	0	0	0	0	0	0	0	0	0.02	0	0.4	0	0	0	0	0	0	0	0	0	0	0
OTU_269	OTU_269;D_0__Bacteria;D_1__Firmicutes;D_2__Clostridia;D_3__Clostridiales;D_4__FamilyXIII;D_5__IncertaeSedis;D_6__unculturedEubacteriaceaebacterium	k__Bacteria;p__Firmicutes;c__Clostridia;o__Clostridiales;f__Peptostreptococcaceae_[XI];g__Peptostreptococcaceae_[XI][G-1];s__sp._oral_taxon_383			0.0074359		0	0	0	0	0	0	0	0	0	0	0	0	0	0	0	0	0	0	0	0	0	0	0	0	0	0	0	0	0	0	0	0	0	0	0	0	0	0	0	0.02	0	0	0
OTU_27	OTU_27;D_0__Bacteria;D_1__Bacteroidetes;D_2__Bacteroidia;D_3__Bacteroidales;D_4__Porphyromonadaceae;D_5__Tannerella;D_6__unculturedbacterium	k__Bacteria;p__Bacteroidetes;c__Bacteroidia;o__Bacteroidales;f__Porphyromonadaceae;g__Tannerella;s__forsythia			0.725641		3.14	0	0	1.14	0	0.04	0.12	0.08	0.38	0	0	0.14	4.26	0.02	0.02	1.44	1.78	0	0.38	2.86	0.74	3.14	0	0.32	0.14	0	0	0.18	1.34	1.66	0.74	0	0.4	0	0.06	0.02	0.08	0	0	0.8	0	0	0
OTU_270	OTU_270;D_0__Bacteria;D_1__Proteobacteria;D_2__Alphaproteobacteria;D_3__Sphingomonadales;D_4__Sphingomonadaceae;D_5__Novosphingobium;D_6__	k__Bacteria;p__Proteobacteria;c__Alphaproteobacteria;o__Sphingomonadales;f__Sphingomonadaceae;g__Porphyrobacter;s__tepidarius			0.00025641		0	0	0	0	0	0	0	0	0	0	0	0	0	0	0	0	0	0	0	0	0	0	0	0	0	0	0	0	0	0	0	0	0	0	0	0	0	0	0	0	0	0	0
OTU_271	OTU_271;D_0__Bacteria;D_1__Actinobacteria;D_2__Actinobacteria;D_3__Actinomycetales;D_4__Actinomycetaceae;D_5__Actinomyces	k__Bacteria;p__Actinobacteria;c__Actinobacteria;o__Actinomycetales;f__Actinomycetaceae;g__Actinomyces;s__sp._oral_taxon_448			0.809744		0	0	3.56	0.04	0.02	0.02	0.2	0.08	0	4.68	0	1.08	0.02	0.62	0.16	0	0.06	0.46	0.02	2.34	0.28	0.04	0.6	0.1	0.06	0	0	0.02	0.2	0.82	0.18	2.44	0.16	0.12	0.08	0.12	0.88	0.04	0.94	0.12	1.66	1.22	0.16
OTU_272	OTU_272;D_0__Bacteria;D_1__Bacteroidetes;D_2__Bacteroidia;D_3__Bacteroidales;D_4__Porphyromonadaceae;D_5__Proteiniphilum	k__Bacteria;p__Bacteroidetes;c__Bacteroidia;o__Bacteroidales;f__Porphyromonadaceae;g__Porphyromonas			0.00025641		0	0	0	0	0	0	0	0	0	0	0	0	0	0	0	0	0	0	0	0	0	0	0	0	0	0	0	0	0	0	0	0	0	0	0	0	0	0	0	0	0	0	0
OTU_273	OTU_273;D_0__Bacteria;D_1__Proteobacteria;D_2__Gammaproteobacteria;D_3__Xanthomonadales;D_4__Xanthomonadaceae;D_5__Stenotrophomonas	k__Bacteria;p__Proteobacteria;c__Gammaproteobacteria;o__Xanthomonadales;f__Xanthomonadaceae;g__Stenotrophomonas;s__maltophilia			0.00025641		0	0	0	0	0	0	0	0	0	0	0	0	0	0	0	0	0	0	0	0	0	0	0	0	0	0	0	0	0	0	0	0	0	0	0	0	0	0	0	0	0.02	0	0
OTU_274	OTU_274;D_0__Bacteria;D_1__Firmicutes;D_2__Clostridia;D_3__Clostridiales;D_4__Lachnospiraceae;D_5__Oribacterium;D_6__	k__Bacteria;p__Firmicutes;c__Clostridia;o__Clostridiales;f__Lachnospiraceae_[XIV];g__Oribacterium			0.0025641		0	0	0	0.02	0	0	0	0	0	0	0	0	0	0	0.02	0	0	0	0	0	0	0	0	0	0	0	0	0	0	0	0	0	0	0.02	0	0	0	0.06	0	0	0	0	0
OTU_277	OTU_277;D_0__Bacteria;D_1__Firmicutes;D_2__Clostridia;D_3__Clostridiales;D_4__Lachnospiraceae	k__Bacteria;p__Firmicutes;c__Clostridia;o__Clostridiales;f__Lachnospiraceae_[XIV];g__Lachnospiraceae_[G-2];s__sp._oral_taxon_096			0.00307692		0	0	0	0	0	0	0	0	0	0	0	0	0	0	0	0	0	0	0	0	0	0	0	0.06	0	0	0	0	0	0	0	0	0	0	0	0	0	0	0	0	0	0	0.02
OTU_278	OTU_278;D_0__Bacteria;D_1__Proteobacteria;D_2__Betaproteobacteria;D_3__Neisseriales;D_4__Neisseriaceae;D_5__Neisseria;D_6__	k__Bacteria;p__Proteobacteria;c__Betaproteobacteria;o__Neisseriales;f__Neisseriaceae;g__Neisseria;s__bacilliformis			0.139487		0.04	0	0.42	0.02	0	0	0	0.14	0.04	0	0.02	0	0	0.22	0	0.04	0.72	0.02	0	0	0.06	0	0	0	0	0	0	0	0	0	0	0	0	0	0	0.08	0	0	0.42	0	0	0	0
OTU_279	OTU_279;D_0__Bacteria;D_1__Proteobacteria;D_2__Deltaproteobacteria;D_3__Myxococcales;D_4__Polyangiaceae;D_5__Sorangium	k__Bacteria;p__Proteobacteria			0.00102564		0	0	0	0	0	0	0	0	0	0	0	0	0	0	0	0	0	0	0	0	0	0	0	0	0	0	0	0	0	0	0	0	0	0	0	0	0	0	0	0	0	0	0
OTU_28	OTU_28;D_0__Bacteria;D_1__Bacteroidetes;D_2__Bacteroidia;D_3__Bacteroidales;D_4__Prevotellaceae;D_5__Prevotella;D_6__Prevotellaloescheii	k__Bacteria;p__Bacteroidetes;c__Bacteroidia;o__Bacteroidales;f__Prevotellaceae;g__Prevotella;s__sp._oral_taxon_317			0.745385		0.34	0	0.86	0.38	0	1.88	1.1	0.04	0	0	1.38	0.3	0	0.02	0	0.26	0.02	1.02	0	0.48	0.38	0.48	0	4.38	0.04	0	0.04	0.3	1.5	0.14	0	1.42	0.14	0	3.66	0.32	3.46	0	0.46	1.12	0	0	0.14
OTU_280	OTU_280;D_0__Bacteria;D_1__Bacteroidetes;D_2__Bacteroidia;D_3__Bacteroidales;D_4__Prevotellaceae;D_5__uncultured;D_6__Prevotellasp.oralcloneFX046	k__Bacteria;p__Bacteroidetes;c__Bacteroidia;o__Bacteroidales;f__Prevotellaceae;g__Prevotella			0.00102564		0	0	0	0	0	0.06	0	0	0	0	0	0	0	0	0	0	0	0	0	0	0	0	0	0	0	0	0	0	0	0	0	0	0	0	0	0	0	0	0	0	0	0	0
OTU_281	OTU_281;D_0__Bacteria;D_1__Firmicutes;D_2__Clostridia;D_3__Clostridiales;D_4__Lachnospiraceae;D_5__Oribacterium;D_6__	k__Bacteria;p__Firmicutes;c__Clostridia;o__Clostridiales;f__Lachnospiraceae_[XIV];g__Oribacterium;s__sp._oral_taxon_102			0.0025641		0	0	0	0	0	0	0	0	0	0	0	0	0	0	0	0	0	0	0	0	0	0	0	0	0.02	0	0	0	0	0.04	0	0	0	0	0	0	0	0	0	0	0	0	0
OTU_282	OTU_282;D_0__Bacteria;D_1__Firmicutes;D_2__Clostridia;D_3__Clostridiales;D_4__Lachnospiraceae	k__Bacteria;p__Firmicutes;c__Clostridia;o__Clostridiales;f__Lachnospiraceae_[XIV];g__Stomatobaculum;s__sp._oral_taxon_373			0.00102564		0	0	0	0	0	0	0	0	0	0	0	0	0	0	0	0	0	0	0	0	0	0	0	0	0	0	0	0	0	0	0	0	0	0	0	0	0	0	0	0	0	0	0
OTU_283	OTU_283;D_0__Bacteria;D_1__Proteobacteria;D_2__Gammaproteobacteria;D_3__Pseudomonadales;D_4__Pseudomonadaceae;D_5__Pseudomonas;D_6__Pseudomonasaeruginosa	k__Bacteria;p__Proteobacteria;c__Gammaproteobacteria;o__Pseudomonadales;f__Pseudomonadaceae;g__Pseudomonas;s__aeruginosa			0.00025641		0	0	0	0	0	0	0	0	0	0	0	0	0	0	0	0	0	0	0.02	0	0	0	0	0	0	0	0	0	0	0	0	0	0	0	0	0	0	0	0	0	0	0	0
OTU_287	OTU_287;D_0__Bacteria;D_1__Fusobacteria;D_2__Fusobacteriia;D_3__Fusobacteriales;D_4__Leptotrichiaceae;D_5__Leptotrichia;D_6__unculturedbacterium	k__Bacteria;p__Fusobacteria;c__Fusobacteriia;o__Fusobacteriales;f__Leptotrichiaceae;g__Leptotrichia			0.0297436		0	0	0	0.38	0	0	0	0	0	0	0.06	0	0	0	0	0	0	0.02	0.02	0	0	0	0	0	0	0	0	0	0.04	0	0	0	0	0.02	0	0.08	0	0.02	0	0	0	0	0
OTU_289	OTU_289;D_0__Bacteria;D_1__Proteobacteria;D_2__Alphaproteobacteria	k__Bacteria;p__Proteobacteria;c__Alphaproteobacteria;o__Caulobacterales;f__Caulobacteraceae;g__Caulobacter;s__sp._oral_taxon_002			0.000512821		0	0	0	0	0	0	0	0	0	0	0	0	0	0	0	0	0	0	0	0	0.02	0	0	0	0	0	0	0	0	0	0	0	0	0	0	0	0	0	0	0	0	0	0
OTU_29	OTU_29;D_0__Bacteria;D_1__Fusobacteria;D_2__Fusobacteriia;D_3__Fusobacteriales;D_4__Leptotrichiaceae;D_5__Leptotrichia;D_6__unculturedbacterium	k__Bacteria;p__Fusobacteria;c__Fusobacteriia;o__Fusobacteriales;f__Leptotrichiaceae;g__Leptotrichia;s__wadei			1.40564		0.3	0	3.02	0.6	0.04	4.6	0.34	0.08	0.14	5.04	0.36	0.2	0.08	3.26	1.24	0	0.06	0.84	0	0.06	0	0.12	1.06	1.2	0.04	0	0.44	0.34	0.02	0.24	0.08	0.78	5.58	1.22	0.5	1.24	2.08	0.02	0.28	0.86	0.14	0	0.26
OTU_290	OTU_290;D_0__Bacteria;D_1__Bacteroidetes;D_2__Sphingobacteriia;D_3__Sphingobacteriales;D_4__Chitinophagaceae;D_5__Sediminibacterium;D_6__Flexibactersp.CF1	k__Bacteria;p__Bacteroidetes;c__Sphingobacteriia;o__Sphingobacteriales;f__Chitinophagaceae;g__Flavitalea;s__sp._oral_taxon_320			0.000769231		0	0	0	0	0	0	0	0	0	0	0	0	0	0	0	0	0	0	0	0	0	0	0	0	0	0	0	0	0	0	0	0	0	0	0	0	0	0	0	0	0	0	0
OTU_291	OTU_291;D_0__Bacteria;D_1__Proteobacteria;D_2__Alphaproteobacteria;D_3__Rhodobacterales;D_4__Rhodobacteraceae	k__Bacteria;p__Proteobacteria;c__Alphaproteobacteria;o__Rhodobacterales;f__Rhodobacteraceae;g__Rhodobacter;s__capsulatus			0.00025641		0	0	0	0	0	0	0	0	0	0	0	0	0	0	0	0	0	0	0.02	0	0	0	0	0	0	0	0	0	0	0	0	0	0	0	0	0	0	0	0	0	0	0	0
OTU_292	OTU_292;D_0__Bacteria;D_1__Bacteroidetes;D_2__Bacteroidia;D_3__Bacteroidales;D_4__Prevotellaceae;D_5__Alloprevotella;D_6__unculturedbacterium	k__Bacteria;p__Bacteroidetes;c__Bacteroidia;o__Bacteroidales;f__Prevotellaceae;g__Alloprevotella			0.00128205		0	0	0	0	0	0	0	0.02	0	0	0	0	0	0	0	0	0.02	0	0	0	0	0.02	0	0.02	0	0	0	0.02	0	0	0	0	0	0	0	0	0	0	0	0	0	0	0
OTU_293	OTU_293;D_0__Bacteria;D_1__Bacteroidetes;D_2__Bacteroidia;D_3__Bacteroidales;D_4__Prevotellaceae;D_5__uncultured;D_6__	k__Bacteria;p__Bacteroidetes;c__Bacteroidia;o__Bacteroidales;f__Prevotellaceae			0.00538462		0	0	0	0	0	0.02	0	0	0	0	0	0	0	0	0	0	0	0	0	0	0.02	0	0	0	0	0	0	0	0	0	0	0	0.02	0	0	0	0	0	0	0.06	0	0	0
OTU_294	OTU_294;D_0__Bacteria;D_1__Bacteroidetes;D_2__Bacteroidia;D_3__Bacteroidales;D_4__Porphyromonadaceae;D_5__Porphyromonas;D_6__unculturedbacterium	k__Bacteria;p__Bacteroidetes;c__Bacteroidia;o__Bacteroidales;f__Porphyromonadaceae;g__Porphyromonas			0.00333333		0	0	0	0	0	0	0	0	0.02	0	0	0	0	0	0	0	0	0	0	0	0	0	0	0	0	0	0	0	0	0	0	0	0	0	0	0	0	0	0	0	0	0	0
OTU_297	OTU_297;D_0__Bacteria;D_1__Firmicutes;D_2__Clostridia;D_3__Clostridiales;D_4__Lachnospiraceae;D_5__Lachnoanaerobaculum;D_6__	k__Bacteria;p__Firmicutes;c__Clostridia;o__Clostridiales;f__Lachnospiraceae_[XIV];g__Lachnoanaerobaculum;s__sp._oral_taxon_089			0.000512821		0	0	0	0	0	0	0	0	0	0	0	0	0	0	0	0	0	0	0	0	0	0	0	0	0	0	0	0	0	0	0	0	0	0	0	0	0	0	0	0.04	0	0	0
OTU_298	OTU_298;D_0__Bacteria;D_1__Proteobacteria;D_2__Gammaproteobacteria;D_3__Cardiobacteriales;D_4__Cardiobacteriaceae	k__Bacteria;p__Proteobacteria;c__Gammaproteobacteria;o__Cardiobacteriales;f__Cardiobacteriaceae;g__Cardiobacterium			0.00487179		0	0	0	0	0	0	0	0	0	0	0	0	0	0	0	0	0	0	0	0.02	0	0	0	0	0	0	0	0	0	0	0	0	0	0	0	0	0	0	0	0	0	0	0
OTU_299	OTU_299;D_0__Bacteria;D_1__Bacteroidetes;D_2__Bacteroidia;D_3__Bacteroidales;D_4__Porphyromonadaceae;D_5__Porphyromonas	k__Bacteria;p__Bacteroidetes;c__Bacteroidia;o__Bacteroidales;f__Porphyromonadaceae;g__Porphyromonas;s__sp._oral_taxon_930			0.00025641		0	0	0	0	0	0	0	0	0	0	0	0	0	0	0	0	0	0	0.02	0	0	0	0	0	0	0	0	0	0	0	0	0	0	0	0	0	0	0	0	0	0	0	0
OTU_3	OTU_3;D_0__Bacteria;D_1__Bacteroidetes;D_2__Bacteroidia;D_3__Bacteroidales;D_4__Prevotellaceae;D_5__Prevotella;D_6__	k__Bacteria;p__Bacteroidetes;c__Bacteroidia;o__Bacteroidales;f__Prevotellaceae;g__Prevotella;s__nigrescens			3.11179		1.06	0	0	2.48	0	4.56	9.56	0.18	0.02	0	0	4.36	0	6.24	0	7.54	0.48	10.04	0.04	0.12	0	1.06	10.28	0.42	4.08	0	5.28	14.9	3.66	3.48	1.56	1.1	7.96	0.04	7.98	1.08	0.2	0	6.72	2.56	0.08	0	0.16
OTU_30	OTU_30;D_0__Bacteria;D_1__Firmicutes;D_2__Negativicutes;D_3__Selenomonadales;D_4__Veillonellaceae;D_5__Dialister	k__Bacteria;p__Firmicutes;c__Negativicutes;o__Selenomonadales;f__Veillonellaceae;g__Dialister;s__invisus			0.787436		0.26	0.06	0	0.02	0	1.86	1.58	0.02	0.08	0.64	0.6	2.1	0.34	0.06	2.58	0.32	0.08	1.24	0	0.24	0.48	0.66	1.4	0.32	0.18	0	0.04	1.16	0.56	0.24	2.62	0	0.52	0.36	2.2	0.1	0.4	0.08	2	3.3	0.4	0	0
OTU_301	OTU_301;D_0__Bacteria;D_1__Actinobacteria;D_2__Actinobacteria;D_3__Actinomycetales;D_4__Actinomycetaceae;D_5__Actinomyces;D_6__	k__Bacteria;p__Actinobacteria;c__Actinobacteria;o__Actinomycetales;f__Actinomycetaceae;g__Actinomyces;s__graevenitzii			0.000512821		0	0	0	0	0	0.02	0	0	0	0	0	0	0	0	0	0	0	0	0	0	0	0	0	0	0	0	0	0	0	0	0	0	0	0	0	0	0	0	0	0	0	0	0
OTU_304	OTU_304;D_0__Bacteria;D_1__Fusobacteria;D_2__Fusobacteriia;D_3__Fusobacteriales	k__Bacteria;p__Fusobacteria;c__Fusobacteriia;o__Fusobacteriales;f__Fusobacteriaceae;g__Fusobacterium;s__necrophorum			0.00230769		0	0	0	0	0	0	0	0	0	0	0	0	0	0	0	0	0	0	0	0	0	0	0	0	0.18	0	0	0	0	0	0	0	0	0	0	0	0	0	0	0	0	0	0
OTU_307	OTU_307;D_0__Bacteria;D_1__Firmicutes;D_2__Negativicutes;D_3__Selenomonadales;D_4__Veillonellaceae;D_5__Dialister;D_6__	k__Bacteria;p__Firmicutes;c__Negativicutes;o__Selenomonadales;f__Veillonellaceae;g__Dialister;s__micraerophilus			0.00564103		0	0	0	0	0	0	0	0	0	0	0	0	0	0	0	0	0	0	0	0	0	0.36	0.06	0	0	0	0	0	0	0	0	0	0	0	0	0	0	0	0	0	0	0	0
OTU_308	OTU_308;D_0__Bacteria;D_1__Fusobacteria;D_2__Fusobacteriia;D_3__Fusobacteriales;D_4__Leptotrichiaceae;D_5__Leptotrichia;D_6__unculturedbacterium	k__Bacteria;p__Fusobacteria;c__Fusobacteriia;o__Fusobacteriales;f__Leptotrichiaceae;g__Leptotrichia;s__sp._oral_taxon_212			0.159231		0	0	0	0.26	0	0	0.04	0.04	0.3	0	0.14	0.02	0	0	0	0	0	0.16	0.28	0.04	0	0	0	0.44	0	4.56	0.06	0	0.06	0	0	0.02	0	0	0.18	0.42	0.16	0.34	0	0.08	0	0	0
OTU_309	OTU_309;D_0__Bacteria;D_1__CandidatedivisionTM7	k__Bacteria;p__Saccharibacteria_(TM7);c__TM7_[C-1];o__TM7_[O-1];f__TM7_[F-1];g__TM7_[G-1];s__sp._oral_taxon_488			0.00102564		0	0	0	0.02	0	0	0	0	0	0	0	0	0	0	0	0	0	0	0	0	0	0	0	0	0	0	0	0	0	0	0	0	0	0	0	0	0	0.02	0	0	0	0	0.02
OTU_31	OTU_31;D_0__Bacteria;D_1__Firmicutes;D_2__Negativicutes;D_3__Selenomonadales;D_4__Veillonellaceae;D_5__Selenomonas	k__Bacteria;p__Firmicutes;c__Negativicutes;o__Selenomonadales;f__Veillonellaceae;g__Selenomonas			1.29667		0.7	0	0	0.52	0	0.06	0.58	0	0.16	0.62	0.08	0.64	0.1	0.52	0.96	3.32	1.12	2.16	0.02	0.06	0.74	0.6	1.88	0.9	1.72	0.02	0.3	3.3	1.5	2.34	1.72	1.88	1.5	0	1.96	0.02	3.44	0	0.5	0.46	0.04	0.02	0
OTU_310	OTU_310;D_0__Bacteria;D_1__Fusobacteria;D_2__Fusobacteriia;D_3__Fusobacteriales;D_4__Leptotrichiaceae;D_5__Leptotrichia;D_6__unculturedprokaryote	k__Bacteria;p__Fusobacteria;c__Fusobacteriia;o__Fusobacteriales;f__Leptotrichiaceae;g__Leptotrichia;s__sp._oral_taxon_218			0.00025641		0	0	0	0	0	0	0	0	0	0	0	0	0	0	0	0	0	0	0	0	0	0	0	0	0	0	0	0	0	0.02	0	0	0	0	0	0	0	0	0	0	0	0	0
OTU_312	OTU_312;D_0__Bacteria;D_1__Bacteroidetes;D_2__Bacteroidia;D_3__Bacteroidales;D_4__S24-7;D_5__PorphyromonadaceaebacteriumC941;D_6__PorphyromonadaceaebacteriumC941	k__Bacteria;p__Bacteroidetes;c__Bacteroidetes_[C-1];o__Bacteroidetes_[O-1];f__Bacteroidetes_[F-1];g__Bacteroidetes_[G-7];s__sp._oral_taxon_911			0.00205128		0	0	0	0	0	0	0	0	0.08	0	0	0	0	0	0	0.02	0	0	0	0	0	0	0	0	0	0	0	0	0	0	0	0	0	0	0	0	0	0	0	0	0	0	0
OTU_314	OTU_314;D_0__Bacteria;D_1__Actinobacteria;D_2__Actinobacteria;D_3__Actinomycetales;D_4__Actinomycetaceae;D_5__Actinobaculum;D_6__unculturedbacterium	k__Bacteria;p__Actinobacteria;c__Actinobacteria;o__Actinomycetales;f__Actinomycetaceae			0.00358974		0	0	0	0	0	0	0	0	0	0	0	0	0	0	0	0	0	0	0	0	0	0	0	0	0	0	0	0	0	0.14	0	0	0	0	0	0	0	0.06	0	0	0	0	0
OTU_316	OTU_316;D_0__Bacteria;D_1__Actinobacteria;D_2__Actinobacteria;D_3__Actinomycetales;D_4__Actinomycetaceae;D_5__Actinomyces	k__Bacteria;p__Actinobacteria;c__Actinobacteria;o__Actinomycetales;f__Actinomycetaceae;g__Actinomyces;s__meyeri			0.199231		0.2	0.2	0.02	0	0	0.06	0.02	0.3	0.1	0	0.24	0	0.56	0.2	0.12	0.14	0.24	0.14	0.38	0.88	0.2	0.04	0	0.06	0.06	0.1	0.14	0.06	0	0.1	0.16	0.1	0.04	0.1	0.18	0.04	0.08	0.78	0.12	0.02	0.02	1.16	0.16
OTU_319	OTU_319;D_0__Bacteria;D_1__Fusobacteria;D_2__Fusobacteriia;D_3__Fusobacteriales;D_4__Leptotrichiaceae;D_5__Leptotrichia	k__Bacteria;p__Fusobacteria;c__Fusobacteriia;o__Fusobacteriales;f__Leptotrichiaceae;g__Leptotrichia			0.0884615		0.06	0	0	1.86	0	0	0.14	0.02	0	0	0	0	0.02	0	0	0	0	0.24	0	0	0	0	0.02	0.02	0	0	0.04	0	0	0.24	0.06	0	0.4	0	0	0.04	0.04	0	0	0	0	0	0
OTU_32	OTU_32;D_0__Bacteria;D_1__Bacteroidetes;D_2__Bacteroidia;D_3__Bacteroidales;D_4__Porphyromonadaceae;D_5__Porphyromonas;D_6__unculturedbacterium	k__Bacteria;p__Bacteroidetes;c__Bacteroidia;o__Bacteroidales;f__Porphyromonadaceae;g__Porphyromonas			0.577436		0.04	9.34	0.06	1.92	0.02	0	0.48	0.02	0.3	0	0.9	0.06	0.02	0.16	0.2	0	0	0.22	0.08	0	0	0	0	0.26	0	0.48	1.18	0.42	0.52	0	0	0.02	0	0.02	0.08	1.1	0.04	2.18	0.26	0.06	0.02	0	1.7
OTU_324	OTU_324;D_0__Bacteria;D_1__CandidatedivisionTM7;D_2__TM7phylumsp.oralcloneEW055;D_3__TM7phylumsp.oralcloneEW055;D_4__TM7phylumsp.oralcloneEW055;D_5__TM7phylumsp.oralcloneEW055;D_6__TM7phylumsp.oralcloneEW055	k__Bacteria;p__Saccharibacteria_(TM7);c__TM7_[C-1];o__TM7_[O-1];f__TM7_[F-1];g__TM7_[G-1];s__sp._oral_taxon_952			0.00794872		0	0	0	0.02	0	0	0.02	0	0	0	0	0	0	0	0	0	0	0	0	0.02	0.02	0	0	0.04	0	0.04	0	0.04	0.02	0	0	0	0	0	0.04	0.02	0.08	0	0	0	0	0	0
OTU_325	OTU_325;D_0__Bacteria;D_1__CandidatedivisionSR1;D_2__unculturedbacterium;D_3__unculturedbacterium;D_4__unculturedbacterium;D_5__unculturedbacterium;D_6__unculturedbacterium	k__Bacteria;p__SR1;c__SR1_[C-1];o__SR1_[O-1];f__SR1_[F-1];g__SR1_[G-1];s__sp._oral_taxon_875			0.00128205		0	0	0	0	0	0	0	0	0	0	0	0	0	0	0	0	0	0.02	0	0	0	0	0	0	0	0	0	0	0	0	0	0	0	0	0	0	0	0	0	0	0	0	0
OTU_326	OTU_326;D_0__Bacteria;D_1__Spirochaetae;D_2__Spirochaetes;D_3__Spirochaetales;D_4__Spirochaetaceae;D_5__Treponema;D_6__unculturedbacterium	k__Bacteria;p__Spirochaetes;c__Spirochaetia;o__Spirochaetales;f__Spirochaetaceae;g__Treponema;s__pectinovorum			0.000512821		0	0	0	0	0	0	0	0	0	0	0	0	0	0	0	0	0	0	0	0	0	0	0	0	0	0	0	0	0	0	0	0	0	0	0	0	0	0	0	0	0	0	0
OTU_327	OTU_327;D_0__Bacteria;D_1__CandidatedivisionTM7;D_2__unculturedbacterium;D_3__unculturedbacterium;D_4__unculturedbacterium;D_5__unculturedbacterium;D_6__unculturedbacterium	k__Bacteria;p__Saccharibacteria_(TM7);c__TM7_[C-1];o__TM7_[O-1];f__TM7_[F-1];g__TM7_[G-1]			0.0146154		0	0	0	0	0	0	0	0	0	0	0	0.02	0	0.04	0	0.08	0	0.02	0	0	0.02	0.14	0	0.04	0	0	0	0.08	0	0	0.1	0	0	0	0	0	0.04	0	0	0.04	0	0	0
OTU_328	OTU_328;D_0__Bacteria;D_1__Firmicutes;D_2__Clostridia;D_3__Clostridiales;D_4__Syntrophomonadaceae;D_5__Pelospora;D_6__Syntrophomonadaceaegenomosp.P1	k__Bacteria;p__Firmicutes;c__Clostridia;o__Clostridiales;f__Syntrophomonadaceae_[VIII];g__Syntrophomonadaceae_[VIII][G-1];s__sp._oral_taxon_435			0.00025641		0	0	0	0	0	0	0	0.02	0	0	0	0	0	0	0	0	0	0	0	0	0	0	0	0	0	0	0	0	0	0	0	0	0	0	0	0	0	0	0	0	0	0	0
OTU_33	OTU_33;D_0__Bacteria;D_1__Firmicutes;D_2__Negativicutes;D_3__Selenomonadales;D_4__Veillonellaceae;D_5__Selenomonas;D_6__	k__Bacteria;p__Firmicutes;c__Negativicutes;o__Selenomonadales;f__Veillonellaceae;g__Selenomonas			1.98077		0.5	0.12	0.24	5.34	0	0.3	3.42	0.08	3.72	4.5	1.68	0.54	0.32	3.62	2.04	4.68	0.22	3.72	0.42	0.2	1.2	2.08	5.1	9.58	0.72	1.92	1.24	1.4	2.12	1.1	0.84	0.86	3.54	0.52	2.42	1.94	5.82	0.14	2.48	0.46	0.08	0.64	0.34
OTU_332	OTU_332;D_0__Bacteria;D_1__Fusobacteria;D_2__Fusobacteriia;D_3__Fusobacteriales;D_4__Leptotrichiaceae;D_5__Leptotrichia;D_6__unculturedbacterium	k__Bacteria;p__Fusobacteria;c__Fusobacteriia;o__Fusobacteriales;f__Leptotrichiaceae;g__Leptotrichia			0.0766667		0	0	0.12	0.26	0	0.14	0.06	0.04	0.02	0.08	0.04	0.02	0	0	0.16	0	0	0.2	0	0	0	0	0.06	0	0	0	0.06	0	0	0.04	0	0.02	0.6	0.02	0	0.18	0	0	0	0.02	0	0	0.04
OTU_336	OTU_336;D_0__Bacteria;D_1__Firmicutes;D_2__Negativicutes;D_3__Selenomonadales;D_4__Veillonellaceae;D_5__Selenomonas	k__Bacteria;p__Firmicutes;c__Negativicutes;o__Selenomonadales;f__Veillonellaceae;g__Veillonellaceae_[G-1];s__sp._oral_taxon_135			0.0628205		0	0	0	0	0	0	0	0	0.06	0.04	0	0	0	0	0	0	0	0	0	0	0	0	0.62	0.04	0.06	0	0.02	0	1.32	0.02	0	0	0	0	0	0	0	0	0	0	0	0	0
OTU_337	OTU_337;D_0__Bacteria;D_1__BD1-5;D_2__;D_3__;D_4__;D_5__;D_6__	k__Bacteria;p__Gracilibacteria_(GN02);c__GN02_[C-1];o__GN02_[O-1];f__GN02_[F-1];g__GN02_[G-1];s__sp._oral_taxon_872			0.000769231		0	0	0	0	0	0	0	0	0	0	0	0	0	0	0	0	0	0.02	0	0	0	0	0	0.02	0	0	0.02	0	0	0	0	0	0	0	0	0	0	0	0	0	0	0	0
OTU_338	OTU_338;D_0__Bacteria;D_1__Fusobacteria;D_2__Fusobacteriia;D_3__Fusobacteriales;D_4__Leptotrichiaceae;D_5__Leptotrichia;D_6__unculturedbacterium	k__Bacteria;p__Fusobacteria;c__Fusobacteriia;o__Fusobacteriales;f__Leptotrichiaceae;g__Leptotrichia			0.0841026		0	0	0.32	0.3	0	0	0.1	0	0	0	0.02	0	0	0	0.02	0	0	0.5	0	0	0	0	0	0.6	0	0	0.18	0	0.28	0	0	0	0.02	0.02	0	0.04	0.08	0	0	0	0	0	0.16
OTU_34	OTU_34;D_0__Bacteria;D_1__Firmicutes;D_2__Clostridia;D_3__Clostridiales;D_4__FamilyXI;D_5__Parvimonas;D_6__unculturedbacterium	k__Bacteria;p__Firmicutes;c__Clostridia;o__Clostridiales;f__Peptoniphilaceae;g__Parvimonas;s__micra			0.368205		0.18	0.46	0	0.04	0.04	0.28	0.32	0	0.06	0	0.72	0.56	0.68	0.76	0.02	0.14	0.06	0.28	0.34	2.94	0.8	0.48	1.22	0	0.72	0.1	0	0.02	0.14	0.2	0.36	0.18	0	0.14	1.48	0	0.04	1.42	0.34	0.24	0.22	0.02	0
OTU_340	OTU_340;D_0__Bacteria;D_1__Bacteroidetes;D_2__Bacteroidia;D_3__Bacteroidales;D_4__Prevotellaceae;D_5__Prevotella	k__Bacteria;p__Bacteroidetes;c__Bacteroidia;o__Bacteroidales;f__Prevotellaceae;g__Prevotella			0.00230769		0	0	0	0	0	0	0	0.02	0	0	0	0	0	0	0	0	0	0	0	0	0	0.04	0	0	0	0	0	0.08	0	0	0	0.02	0	0	0	0	0	0	0	0	0	0	0
OTU_346	OTU_346;D_0__Bacteria;D_1__Firmicutes;D_2__Clostridia;D_3__Clostridiales;D_4__Lachnospiraceae;D_5__Oribacterium	k__Bacteria;p__Firmicutes;c__Clostridia;o__Clostridiales;f__Lachnospiraceae_[XIV];g__Oribacterium;s__asaccharolyticum			0.00102564		0	0	0	0	0	0	0	0	0	0.08	0	0	0	0	0	0	0	0	0	0	0	0	0	0	0	0	0	0	0	0	0	0	0	0	0	0	0	0	0	0	0	0	0
OTU_347	OTU_347;D_0__Bacteria;D_1__Synergistetes;D_2__Synergistia;D_3__Synergistales;D_4__Synergistaceae;D_5__Fretibacterium;D_6__unculturedSynergistetesbacterium	k__Bacteria;p__Synergistetes;c__Synergistia;o__Synergistales;f__Synergistaceae;g__Fretibacterium			0.0123077		0.04	0	0	0	0	0	0	0	0.02	0	0	0	0	0	0	0.02	0.06	0	0.02	0	0	0	0	0	0.02	0	0	0	0.02	0.04	0	0	0	0	0	0	0	0	0	0	0	0	0
OTU_348	OTU_348;D_0__Bacteria;D_1__Bacteroidetes;D_2__Bacteroidia;D_3__Bacteroidales;D_4__Prevotellaceae;D_5__Prevotella	k__Bacteria;p__Bacteroidetes;c__Bacteroidia;o__Bacteroidales;f__Prevotellaceae;g__Prevotella;s__sp._oral_taxon_305			0.0025641		0	0	0	0	0	0	0	0	0	0	0	0	0.02	0	0	0	0	0	0	0	0	0	0	0	0	0	0	0	0	0	0	0	0	0	0	0	0	0	0	0	0	0	0
OTU_349	OTU_349;D_0__Bacteria;D_1__Firmicutes;D_2__Negativicutes;D_3__Selenomonadales;D_4__Veillonellaceae;D_5__Veillonella;D_6__	k__Bacteria;p__Firmicutes;c__Negativicutes;o__Selenomonadales;f__Veillonellaceae;g__Veillonella;s__sp._oral_taxon_780			0.000769231		0	0	0	0	0	0	0	0.04	0	0	0	0	0	0	0	0	0	0	0	0	0	0	0	0	0	0	0	0	0	0	0	0	0	0	0	0	0	0	0	0	0	0	0.02
OTU_35	OTU_35;D_0__Bacteria;D_1__Actinobacteria;D_2__Actinobacteria;D_3__Actinomycetales;D_4__Actinomycetaceae;D_5__Actinobaculum;D_6__unculturedbacterium	k__Bacteria;p__Actinobacteria;c__Actinobacteria;o__Actinomycetales;f__Actinomycetaceae;g__Actinobaculum;s__sp._oral_taxon_183			0.692051		0	0	0.18	0.1	0	0.02	1.44	0.12	0.02	1.56	0.14	0.36	0.04	1.88	0.06	0	0	0.2	0.02	0.34	0.08	0	0.18	0.16	0.04	1.3	0.96	0.26	2.52	0.84	0.38	0.66	1.28	0	2.5	0.22	7.06	0.42	1.52	1.02	0.3	3.1	0.16
OTU_350	OTU_350;D_0__Bacteria;D_1__Bacteroidetes;D_2__Bacteroidia;D_3__Bacteroidales;D_4__Bacteroidaceae;D_5__Bacteroides;D_6__	k__Bacteria;p__Bacteroidetes;c__Bacteroidia;o__Bacteroidales;f__Bacteroidaceae;g__Bacteroides;s__pyogenes			0.00230769		0	0	0	0	0	0	0	0	0	0	0	0	0.18	0	0	0	0	0	0	0	0	0	0	0	0	0	0	0	0	0	0	0	0	0	0	0	0	0	0	0	0	0	0
OTU_351	OTU_351;D_0__Bacteria;D_1__Fusobacteria;D_2__Fusobacteriia;D_3__Fusobacteriales	k__Bacteria;p__Fusobacteria;c__Fusobacteriia;o__Fusobacteriales;f__Fusobacteriaceae;g__Fusobacterium;s__nucleatum_subsp._animalis			0.00384615		0	0	0	0	0	0.02	0.02	0	0	0	0	0	0	0	0	0	0	0	0	0	0.02	0	0	0	0.02	0	0	0.04	0.02	0	0	0	0	0	0	0	0.02	0	0	0	0	0	0
OTU_352	OTU_352;D_0__Bacteria;D_1__Bacteroidetes;D_2__Flavobacteriia;D_3__Flavobacteriales;D_4__Flavobacteriaceae;D_5__Capnocytophaga;D_6__	k__Bacteria;p__Bacteroidetes;c__Flavobacteriia;o__Flavobacteriales;f__Flavobacteriaceae;g__Capnocytophaga			0.00102564		0	0	0	0	0	0	0	0	0	0	0	0	0	0	0	0	0	0.02	0	0	0	0	0	0	0	0	0.02	0	0	0	0	0	0	0	0	0	0	0	0	0	0	0	0
OTU_353	OTU_353;D_0__Bacteria;D_1__Proteobacteria;D_2__Alphaproteobacteria;D_3__Rhizobiales;D_4__Phyllobacteriaceae	k__Bacteria;p__Proteobacteria;c__Alphaproteobacteria;o__Rhizobiales;f__Phyllobacteriaceae;g__Defluvibacter;s__lusatiensis			0.00025641		0	0	0	0	0	0	0	0	0	0	0	0	0	0	0	0	0	0	0	0.02	0	0	0	0	0	0	0	0	0	0	0	0	0	0	0	0	0	0	0	0	0	0	0
OTU_355	OTU_355;D_0__Bacteria;D_1__Firmicutes;D_2__Clostridia;D_3__Clostridiales;D_4__FamilyXIII;D_5__IncertaeSedis;D_6__unculturedbacterium	k__Bacteria;p__Firmicutes;c__Clostridia;o__Clostridiales;f__Peptostreptococcaceae_[XI];g__Peptostreptococcaceae_[XI][G-3];s__sp._oral_taxon_495			0.00025641		0	0	0	0	0	0	0	0	0	0	0	0	0	0	0	0	0	0	0	0	0	0	0	0	0	0	0	0	0	0	0	0	0	0	0	0	0	0	0	0	0	0	0
OTU_356	OTU_356;D_0__Bacteria;D_1__Proteobacteria;D_2__Betaproteobacteria;D_3__Neisseriales;D_4__Neisseriaceae;D_5__Neisseria	k__Bacteria;p__Proteobacteria;c__Betaproteobacteria;o__Neisseriales;f__Neisseriaceae;g__Neisseria;s__oralis			0.267949		0	1.18	0.02	1.36	0	0	0.14	0	0	0.06	0	0	0	0	0	0	0	2.02	0	2.2	0	0	0	0	0	0	5.18	0	0.04	0	0	0	4.1	0	0	0	0	0.02	0.34	0	0	0	0.08
OTU_357	OTU_357;D_0__Bacteria;D_1__Actinobacteria;D_2__Actinobacteria;D_3__Propionibacteriales;D_4__Propionibacteriaceae;D_5__uncultured;D_6__Propionibacteriumsp.canineoraltaxon365	k__Bacteria;p__Actinobacteria;c__Actinobacteria;o__Propionibacteriales;f__Propionibacteriaceae;g__Propionibacterium			0.0102564		0	0	0	0	0	0	0	0.08	0.02	0	0.04	0	0	0	0	0	0	0.02	0.02	0.06	0	0	0	0	0	0	0.12	0	0	0	0.02	0	0.02	0	0	0	0	0.04	0.02	0	0	0	0
OTU_36	OTU_36;D_0__Bacteria;D_1__Proteobacteria;D_2__Betaproteobacteria;D_3__Neisseriales;D_4__Neisseriaceae;D_5__Kingella;D_6__unculturedbacterium	k__Bacteria;p__Proteobacteria;c__Betaproteobacteria;o__Neisseriales;f__Neisseriaceae;g__Kingella;s__oralis			0.787179		0.44	0.18	0.94	0.22	2.88	0	0.88	0.8	3.34	0.1	0.24	4.26	0	0.04	0.04	0.44	1.34	0.04	1.44	0.12	0.06	0	0.06	0.08	0	0	0	0.06	0.02	0.06	0.2	0.02	0.92	4.48	0.34	0.12	0.38	1.14	1.24	0.86	9.88	1.74	1.48
OTU_360	OTU_360;D_0__Bacteria;D_1__Bacteroidetes;D_2__Bacteroidia;D_3__Bacteroidales;D_4__Prevotellaceae;D_5__uncultured;D_6__unculturedPrevotellasp.	k__Bacteria;p__Bacteroidetes;c__Bacteroidia;o__Bacteroidales;f__Prevotellaceae;g__Prevotella			0.00179487		0	0	0	0	0	0	0	0	0	0	0	0	0	0	0	0	0	0	0	0	0	0	0	0	0	0	0	0.08	0	0	0	0	0	0	0	0	0	0	0	0	0	0	0
OTU_365	OTU_365;D_0__Bacteria;D_1__Proteobacteria;D_2__Gammaproteobacteria;D_3__Pseudomonadales;D_4__Moraxellaceae;D_5__Acinetobacter;D_6__	k__Bacteria;p__Proteobacteria;c__Gammaproteobacteria;o__Pseudomonadales;f__Moraxellaceae;g__Acinetobacter;s__baumannii			0.00025641		0	0	0	0	0	0	0	0	0	0	0	0	0	0	0	0	0	0	0	0	0	0	0	0	0	0	0	0	0	0	0	0	0	0	0	0	0	0	0	0	0	0	0
OTU_366	OTU_366;D_0__Bacteria;D_1__Firmicutes;D_2__Negativicutes;D_3__Selenomonadales;D_4__Veillonellaceae;D_5__Selenomonas;D_6__	k__Bacteria;p__Firmicutes;c__Negativicutes;o__Selenomonadales;f__Veillonellaceae;g__Selenomonas			0.0223077		0.24	0	0.12	0.02	0	0.02	0	0	0.06	0	0.04	0	0	0.06	0	0.02	0	0.12	0.02	0.02	0	0	0	0.02	0	0	0	0	0	0	0	0	0.04	0.04	0.08	0	0.04	0	0.02	0.02	0	0.04	0
OTU_369	OTU_369;D_0__Bacteria;D_1__Actinobacteria;D_2__Actinobacteria;D_3__Corynebacteriales;D_4__Corynebacteriaceae;D_5__Corynebacterium;D_6__Corynebacteriummatruchotii	k__Bacteria;p__Actinobacteria;c__Actinobacteria;o__Corynebacteriales;f__Corynebacteriaceae;g__Corynebacterium;s__matruchotii			0.00589744		0.02	0	0.06	0	0	0	0	0	0	0	0	0	0	0	0.02	0.02	0	0	0	0	0	0	0	0.02	0	0	0	0	0	0	0	0	0	0	0	0.06	0.02	0	0	0	0	0	0
OTU_37	OTU_37;D_0__Bacteria;D_1__Proteobacteria;D_2__Gammaproteobacteria;D_3__Pasteurellales;D_4__Pasteurellaceae	k__Bacteria;p__Proteobacteria;c__Gammaproteobacteria;o__Pasteurellales;f__Pasteurellaceae;g__Aggregatibacter			0.396667		0.02	8.2	0.08	0	0.08	0	0.02	0.42	0.02	0.18	0.06	0	0	0.06	0.02	0.04	0	0.18	3.94	0.16	0	0	0	0.26	0	0.2	4.82	0	0.12	0	0	0	0.02	0.12	0	0.18	0.04	0.06	0	0.04	0.02	0	0.1
OTU_370	OTU_370;D_0__Bacteria;D_1__Spirochaetae;D_2__Spirochaetes;D_3__Spirochaetales;D_4__Spirochaetaceae;D_5__Treponema	k__Bacteria;p__Spirochaetes;c__Spirochaetia;o__Spirochaetales;f__Spirochaetaceae;g__Treponema;s__denticola			0.0305128		0	0	0	0	0	0	0	0	0.06	0	0.02	0	0	0	0	0.14	0.2	0.02	0	0	0.02	0	0	0	0	0	0	0.22	0.08	0	0	0	0	0	0	0	0	0	0	0	0	0	0
OTU_371	OTU_371;D_0__Bacteria;D_1__Firmicutes;D_2__Negativicutes;D_3__Selenomonadales;D_4__Veillonellaceae;D_5__Dialister	k__Bacteria;p__Firmicutes;c__Negativicutes;o__Selenomonadales;f__Veillonellaceae;g__Dialister;s__invisus			0.0148718		0.02	0	0	0	0	0.2	0.04	0	0	0.02	0.02	0.04	0	0	0.12	0	0.04	0.04	0	0.02	0	0	0.04	0.02	0	0	0	0	0	0.04	0	0	0.02	0	0	0.02	0	0	0	0.04	0.04	0	0
OTU_372	OTU_372;D_0__Bacteria;D_1__CandidatedivisionTM7	k__Bacteria;p__Saccharibacteria_(TM7);c__TM7_[C-1];o__TM7_[O-1];f__TM7_[F-1];g__TM7_[G-1];s__sp._oral_taxon_348			0.00102564		0	0	0	0	0	0	0	0	0	0	0	0	0	0	0	0	0	0.02	0	0	0	0	0	0	0	0	0	0	0	0	0	0	0	0	0	0.02	0	0	0	0	0	0	0.02
OTU_378	OTU_378;D_0__Bacteria;D_1__Proteobacteria;D_2__Betaproteobacteria;D_3__Burkholderiales;D_4__Comamonadaceae	k__Bacteria;p__Proteobacteria;c__Betaproteobacteria;o__Burkholderiales;f__Comamonadaceae;g__Delftia;s__acidovorans			0.00025641		0	0	0	0	0	0	0	0	0	0	0	0	0	0	0.02	0	0	0	0	0	0	0	0	0	0	0	0	0	0	0	0	0	0	0	0	0	0	0	0	0	0	0	0
OTU_379	OTU_379;D_0__Bacteria;D_1__Fusobacteria;D_2__Fusobacteriia;D_3__Fusobacteriales;D_4__Leptotrichiaceae;D_5__Leptotrichia;D_6__unculturedbacterium	k__Bacteria;p__Fusobacteria;c__Fusobacteriia;o__Fusobacteriales;f__Leptotrichiaceae;g__Leptotrichia;s__sp._oral_taxon_392			0.0846154		0	0	0	2	0	0	0	0	0	0	0.3	0	0	0.02	0	0	0	0.36	0	0	0	0	0.02	0.82	0	0.02	0.06	0.06	0.3	0	0	0	0	0.06	0.02	0.04	0.02	0.16	0.02	0	0	0	0.04
OTU_38	OTU_38;D_0__Bacteria;D_1__Firmicutes;D_2__Bacilli;D_3__Lactobacillales;D_4__Streptococcaceae;D_5__Streptococcus;D_6__	k__Bacteria;p__Firmicutes;c__Bacilli;o__Lactobacillales;f__Streptococcaceae;g__Streptococcus			0.584103		0.24	0.34	0.38	0.14	0	1.2	0.68	1.26	0.16	0.62	0.54	0.5	0.04	0.6	0.8	0.06	0.98	0.8	2.18	0.82	0.08	0.06	0.22	0.04	0.44	0.1	0.12	0.08	0.1	0.84	0.34	0.66	0.04	0.34	0.24	0.18	0	0.42	0.82	0.22	1.3	3.5	0.12
OTU_383	OTU_383;D_0__Bacteria;D_1__Actinobacteria;D_2__Coriobacteriia;D_3__Coriobacteriales;D_4__Coriobacteriaceae	k__Bacteria;p__Actinobacteria;c__Coriobacteriia;o__Coriobacteriales;f__Atopobiaceae;g__Olsenella;s__uli			0.0564103		0	0	0	0	0	0	0	0	0	0	0	0	0.1	0	0	0.06	0	0	0	0	0	0.04	0.04	0	0.08	0	0	0.48	0.04	0.02	0.02	0	0	0	0	0	0	0	0	0.36	0	0	0
OTU_385	OTU_385;D_0__Bacteria;D_1__Spirochaetae;D_2__Spirochaetes;D_3__Spirochaetales;D_4__Spirochaetaceae;D_5__Treponema;D_6__Treponemasp.oraltaxon250	k__Bacteria;p__Spirochaetes;c__Spirochaetia;o__Spirochaetales;f__Spirochaetaceae;g__Treponema;s__sp._oral_taxon_256			0.0102564		0	0	0	0	0	0	0	0	0	0	0	0	0	0	0	0	0	0	0	0	0	0	0	0	0	0	0	0	0.02	0	0	0	0	0	0	0	0	0	0	0	0	0	0
OTU_386	OTU_386;D_0__Bacteria;D_1__Firmicutes;D_2__Negativicutes;D_3__Selenomonadales;D_4__Veillonellaceae;D_5__Selenomonas	k__Bacteria;p__Firmicutes;c__Negativicutes;o__Selenomonadales;f__Veillonellaceae			0.015641		0.02	0	0	0.04	0	0	0	0	0.02	0	0	0.02	0.02	0.08	0	0.06	0	0.04	0	0	0.04	0.06	0.06	0.1	0	0.02	0.02	0	0	0	0.02	0	0	0	0	0	0.04	0	0.06	0	0	0	0
OTU_387	OTU_387;D_0__Bacteria;D_1__Proteobacteria;D_2__Epsilonproteobacteria;D_3__Campylobacterales;D_4__Campylobacteraceae;D_5__Campylobacter	k__Bacteria;p__Proteobacteria;c__Epsilonproteobacteria;o__Campylobacterales;f__Campylobacteraceae;g__Campylobacter			0.0166667		0.02	0	0	0	0	0	0.06	0	0	0	0	0.02	0	0	0.02	0.02	0	0	0.02	0	0	0.04	0	0.04	0	0	0	0.2	0.02	0	0.02	0.02	0	0	0	0.02	0.02	0.02	0.06	0.1	0.02	0	0
OTU_389	OTU_389;D_0__Bacteria;D_1__Proteobacteria;D_2__Epsilonproteobacteria;D_3__Campylobacterales;D_4__Campylobacteraceae;D_5__Campylobacter;D_6__	k__Bacteria;p__Proteobacteria;c__Epsilonproteobacteria;o__Campylobacterales;f__Campylobacteraceae;g__Campylobacter;(s__rectus/s__showae)			0.122564		0	1.38	0.02	0.18	0.06	0	0	0.02	0.08	0.02	0.04	0	0	0.26	0.14	0	0.06	1.06	0.04	0.08	0.02	0.02	0	0.02	0.04	0	0.04	0.04	0.08	0	0	0	0	0.2	0.3	0.2	0.02	1.1	0	0.06	0.02	0	0.02
OTU_39	OTU_39;D_0__Bacteria;D_1__Fusobacteria;D_2__Fusobacteriia;D_3__Fusobacteriales;D_4__Leptotrichiaceae;D_5__Leptotrichia;D_6__unculturedbacterium	k__Bacteria;p__Fusobacteria;c__Fusobacteriia;o__Fusobacteriales;f__Leptotrichiaceae;g__Leptotrichia;s__hofstadii			1.22128		0.06	1.02	9.22	0.82	0	0	2.04	0.28	0	0.06	3.22	0.3	0	0	4.14	0	0	1.64	0.02	0.1	0	0	0	14.64	0	0.18	0.54	0.24	2.58	0.42	0.74	0.42	4.98	0.18	0.02	4.16	0.64	0.04	2.22	0.06	0.02	0.02	6.48
OTU_394	OTU_394;D_0__Bacteria;D_1__Proteobacteria	k__Bacteria			0.000512821		0	0	0	0	0	0	0	0	0	0	0	0	0	0	0	0	0.04	0	0	0	0	0	0	0	0	0	0	0	0	0	0	0	0	0	0	0	0	0	0	0	0	0	0
OTU_397	OTU_397;D_0__Bacteria;D_1__CandidatedivisionTM7	k__Bacteria;p__Saccharibacteria_(TM7);c__TM7_[C-1];o__TM7_[O-1];f__TM7_[F-1];g__TM7_[G-1];s__sp._oral_taxon_349			0.00641026		0	0	0	0	0	0	0	0	0	0	0	0	0	0	0	0.08	0	0.02	0	0	0	0	0	0	0	0	0	0	0	0	0.02	0	0	0	0	0	0	0	0	0	0	0	0
OTU_40	OTU_40;D_0__Bacteria;D_1__Bacteroidetes;D_2__Bacteroidia;D_3__Bacteroidales;D_4__Prevotellaceae;D_5__Prevotella	k__Bacteria;p__Bacteroidetes;c__Bacteroidia;o__Bacteroidales;f__Prevotellaceae;g__Prevotella;s__sp._oral_taxon_300			1.34103		0.04	0	0	0.3	0	3.3	4.12	0.04	0.26	0.06	0.14	0.98	0	2.82	0.14	2.8	0.1	3.56	0	0.08	2	0.08	3.86	0.14	0.44	0	0.06	3.34	2.16	4.52	3.1	4.12	1.44	0	0.16	0.2	0.96	0	3.6	0.16	0.04	0.16	0.02
OTU_402	OTU_402;D_0__Bacteria;D_1__Firmicutes;D_2__Negativicutes;D_3__Selenomonadales;D_4__Veillonellaceae;D_5__Selenomonas;D_6__Selenomonassputigena	k__Bacteria;p__Firmicutes;c__Negativicutes;o__Selenomonadales;f__Veillonellaceae;g__Selenomonas			0.00025641		0	0	0	0	0	0	0	0	0	0	0	0	0	0	0	0	0	0	0	0	0	0	0	0	0	0	0	0	0	0	0	0	0	0	0	0	0	0	0	0	0	0	0
OTU_403	OTU_403;D_0__Bacteria;D_1__Actinobacteria;D_2__Actinobacteria;D_3__Bifidobacteriales;D_4__Bifidobacteriaceae;D_5__Bifidobacterium;D_6__BifidobacteriumdentiumBd1	k__Bacteria;p__Actinobacteria;c__Actinobacteria;o__Bifidobacteriales;f__Bifidobacteriaceae;g__Bifidobacterium;s__dentium			0.000512821		0	0	0	0	0	0	0	0	0	0	0	0	0	0	0	0	0	0	0	0	0	0	0	0	0	0	0	0	0	0	0	0	0	0	0	0	0	0	0	0	0	0	0
OTU_409	OTU_409;D_0__Bacteria;D_1__Fusobacteria;D_2__Fusobacteriia;D_3__Fusobacteriales;D_4__Leptotrichiaceae;D_5__Leptotrichia;D_6__unculturedbacterium	k__Bacteria;p__Fusobacteria;c__Fusobacteriia;o__Fusobacteriales;f__Leptotrichiaceae;g__Leptotrichia;s__sp._oral_taxon_223			0.0315385		0.02	0	0	0	0	0	0.02	0.02	0	0	0.06	0	0	0	0.48	0	0	0	0	0	0	0	0	0.02	0	0	0	0	0.08	0.02	0.1	0	0	0	0	0.02	0	0	0	0	0	0	0
OTU_41	OTU_41;D_0__Bacteria;D_1__Firmicutes;D_2__Clostridia;D_3__Clostridiales;D_4__Peptostreptococcaceae;D_5__Filifactor;D_6__	k__Bacteria;p__Firmicutes;c__Clostridia;o__Clostridiales;f__Peptostreptococcaceae_[XI];g__Filifactor;s__alocis			0.262308		0	0	0	0	0	0	0	0.02	0.18	0	0.42	0.12	0	0	0	0.64	0.36	0	0.18	0	0	0	0	0.08	1.46	0	0	0.22	0.6	0	0	0	0	0	0	0	0	0	0	0.42	0	0	0
OTU_411	OTU_411;D_0__Bacteria;D_1__Firmicutes;D_2__Negativicutes;D_3__Selenomonadales;D_4__Veillonellaceae;D_5__Veillonella	k__Bacteria;p__Firmicutes;c__Negativicutes;o__Selenomonadales;f__Veillonellaceae;g__Veillonella;s__parvula			0.0248718		0	0.02	0.02	0.02	0.1	0.08	0.02	0.06	0	0	0.02	0.24	0	0	0.26	0	0.04	0	0	0	0.04	0	0.04	0.02	0	0.02	0	0	0	0.02	0	0.04	0.1	0.02	0	0	0	0.02	0.04	0.04	0.08	0.18	0
OTU_415	OTU_415;D_0__Bacteria;D_1__Bacteroidetes;D_2__Bacteroidia;D_3__Bacteroidales;D_4__Prevotellaceae;D_5__Prevotella;D_6__unculturedbacterium	k__Bacteria;p__Bacteroidetes;c__Bacteroidia;o__Bacteroidales;f__Prevotellaceae;g__Prevotella			0.000769231		0	0	0	0	0	0	0	0	0	0	0	0	0	0	0	0	0	0	0	0	0	0	0	0	0	0	0	0	0	0	0	0	0.06	0	0	0	0	0	0	0	0	0	0
OTU_417	OTU_417;D_0__Bacteria;D_1__Bacteroidetes;D_2__Bacteroidia;D_3__Bacteroidales;D_4__Porphyromonadaceae;D_5__Porphyromonas;D_6__unculturedbacterium	k__Bacteria;p__Bacteroidetes;c__Bacteroidia;o__Bacteroidales;f__Porphyromonadaceae;g__Porphyromonas;(s__catoniae/s__sp._oral_taxon_275/s__sp._oral_taxon_277/s__sp._oral_taxon_284)			0.00923077		0	0.06	0	0	0	0	0	0	0.02	0	0.02	0	0	0.04	0	0	0	0	0	0	0	0	0	0	0	0.08	0.16	0	0	0	0	0.02	0	0	0.04	0	0	0.02	0	0	0	0	0.04
OTU_418	OTU_418;D_0__Bacteria;D_1__Spirochaetae;D_2__Spirochaetes;D_3__Spirochaetales;D_4__Spirochaetaceae;D_5__Treponema;D_6__Treponemaamylovorum	k__Bacteria;p__Spirochaetes;c__Spirochaetia;o__Spirochaetales;f__Spirochaetaceae;g__Treponema;s__amylovorum			0.0161538		0	0	0	0	0	0	0	0	0	0	0	0	0	0	0	0.44	0	0	0	0	0	0	0	0	0	0	0	0	0	0	0	0	0	0	0	0	0	0	0	0	0	0	0
OTU_419	OTU_419;D_0__Bacteria;D_1__Fusobacteria;D_2__Fusobacteriia;D_3__Fusobacteriales;D_4__Leptotrichiaceae;D_5__Leptotrichia;D_6__unculturedbacterium	k__Bacteria;p__Fusobacteria;c__Fusobacteriia;o__Fusobacteriales;f__Leptotrichiaceae;g__Leptotrichia;s__sp._oral_taxon_225			0.110256		0	0.86	0	0.04	0	0	0.02	0.02	0	0	0.1	0	0	0	0	0	0	0.6	0	0	0	0	0	0.22	0	0.04	0.14	0	0.32	0	0	0	0	0.02	0	0.64	0	0	0.12	0	0	0	1.04
OTU_42	OTU_42;D_0__Bacteria;D_1__Proteobacteria;D_2__Gammaproteobacteria;D_3__Cardiobacteriales;D_4__Cardiobacteriaceae;D_5__Cardiobacterium;D_6__unculturedbacterium	k__Bacteria;p__Proteobacteria;c__Gammaproteobacteria;o__Cardiobacteriales;f__Cardiobacteriaceae;g__Cardiobacterium;s__hominis			0.501282		0.02	0	3.34	0.16	2.6	0	0.38	0.28	0.48	0.1	0.48	0.32	0	0.08	0.04	0	0	0.32	1.12	0.5	0	0	0.08	0.32	0	0.3	0.6	0	1.34	0	0.06	0.04	0.28	3.16	1.48	1.98	0.72	1.46	0.44	0.86	0.7	0	4.84
OTU_421	OTU_421;D_0__Bacteria;D_1__Bacteroidetes;D_2__Bacteroidia;D_3__Bacteroidales;D_4__Prevotellaceae;D_5__Prevotella	k__Bacteria;p__Bacteroidetes;c__Bacteroidia;o__Bacteroidales;f__Prevotellaceae;g__Prevotella;s__sp._oral_taxon_300			0.0451282		0	0	0.02	0.02	0	0.02	0.12	0	0	0	0	0.06	0	0.02	0.06	0.16	0	0.12	0	0	0.06	0	0.12	0	0.02	0	0.02	0.38	0.04	0.02	0.04	0.02	0.02	0	0	0	0	0	0.12	0	0	0	0
OTU_422	OTU_422;D_0__Bacteria;D_1__Actinobacteria;D_2__Coriobacteriia;D_3__Coriobacteriales;D_4__Coriobacteriaceae;D_5__Atopobium	k__Bacteria;p__Actinobacteria;c__Coriobacteriia;o__Coriobacteriales;f__Coriobacteriaceae;g__Atopobium			0.00205128		0	0	0	0	0	0	0	0	0	0	0	0	0	0	0	0	0	0	0	0	0.02	0	0.02	0	0	0	0	0.04	0	0	0	0	0	0	0	0	0	0	0	0	0	0	0
OTU_424	OTU_424;D_0__Bacteria;D_1__Proteobacteria;D_2__Betaproteobacteria;D_3__Neisseriales;D_4__Neisseriaceae	k__Bacteria;p__Proteobacteria;c__Betaproteobacteria;o__Neisseriales;f__Neisseriaceae;g__Neisseria;(s__flavescens/s__subflava)			0.0374359		0	0.02	0.04	0	0	0	0	0.04	0.14	0	0	0	0	0	0	0	0.02	0.04	0	0	0	0	0	0	0	0	0.04	0	0	0	0	0	0	0	0.02	0.34	0	0.1	1.06	0	0	0	0.22
OTU_427	OTU_427;D_0__Bacteria;D_1__Bacteroidetes;D_2__Bacteroidia;D_3__Bacteroidales;D_4__Prevotellaceae;D_5__Prevotella;D_6__Prevotellagenomosp.P7oralcloneMB2_P31	k__Bacteria;p__Bacteroidetes;c__Bacteroidia;o__Bacteroidales;f__Prevotellaceae;g__Prevotella;s__fusca			0.0615385		0	0	0	0.02	0	0	0.16	0	0	0	0.06	0.12	0	0	0.12	0.08	0.78	0.18	0.02	0	0	0	0	0	0.02	0	0.02	0.28	0	0	0.04	0	0	0	0	0	0	0	0.1	0.02	0	0.12	0
OTU_43	OTU_43;D_0__Bacteria;D_1__Bacteroidetes;D_2__Flavobacteriia;D_3__Flavobacteriales;D_4__Flavobacteriaceae;D_5__Capnocytophaga;D_6__Capnocytophagagranulosa	k__Bacteria;p__Bacteroidetes;c__Flavobacteriia;o__Flavobacteriales;f__Flavobacteriaceae;g__Capnocytophaga			0.547692		0.32	0	0.38	0.42	3.4	0.02	0.42	0.34	0.34	0.02	0.84	0.06	0.02	1.32	0.14	1.26	0.02	2.5	0.06	0.06	0	0	0.08	0.14	0	0.24	0.72	0.04	0.12	0.02	0	0	0.08	0.32	0.3	2.82	0.32	8.38	0.76	0.46	0.06	0.32	4.34
OTU_431	OTU_431;D_0__Bacteria;D_1__Actinobacteria;D_2__Coriobacteriia;D_3__Coriobacteriales;D_4__Coriobacteriaceae;D_5__Atopobium	k__Bacteria;p__Actinobacteria;c__Coriobacteriia;o__Coriobacteriales;f__Coriobacteriaceae;g__Atopobium;s__minutum			0.00025641		0	0	0	0	0	0	0	0	0	0	0.02	0	0	0	0	0	0	0	0	0	0	0	0	0	0	0	0	0	0	0	0	0	0	0	0	0	0	0	0	0	0	0	0
OTU_433	OTU_433;D_0__Bacteria;D_1__Actinobacteria;D_2__Actinobacteria;D_3__Bifidobacteriales;D_4__Bifidobacteriaceae;D_5__Aeriscardovia;D_6__Bifidobacteriaceaegenomosp.C1	k__Bacteria;p__Actinobacteria;c__Actinobacteria;o__Bifidobacteriales;f__Bifidobacteriaceae;g__Bifidobacteriaceae_[G-2];s__sp._oral_taxon_407			0.00153846		0	0	0	0	0	0	0	0	0	0	0	0	0	0	0	0	0	0	0	0	0	0	0	0	0	0	0	0	0	0	0	0.12	0	0	0	0	0	0	0	0	0	0	0
OTU_435	OTU_435;D_0__Bacteria;D_1__CandidatedivisionTM7;D_2__unculturedbacterium;D_3__unculturedbacterium;D_4__unculturedbacterium;D_5__unculturedbacterium;D_6__unculturedbacterium	k__Bacteria;p__Saccharibacteria_(TM7);c__TM7_[C-1];o__TM7_[O-1];f__TM7_[F-1];g__TM7_[G-1];s__sp._oral_taxon_347			0.0164103		0.14	0	0.42	0	0	0	0	0	0	0	0	0	0	0	0	0	0	0	0.26	0	0	0	0	0	0	0.02	0	0	0	0	0	0.04	0.02	0	0	0.12	0	0	0	0	0	0.04	0
OTU_438	OTU_438;D_0__Bacteria;D_1__Actinobacteria;D_2__Actinobacteria;D_3__Corynebacteriales;D_4__Corynebacteriaceae;D_5__uncultured;D_6__unculturedbacterium	k__Bacteria;p__Actinobacteria;c__Actinobacteria			0.000769231		0	0	0	0	0	0	0	0	0	0	0	0	0	0	0	0	0	0	0	0	0	0	0	0	0	0	0	0	0	0	0	0	0	0	0	0	0	0	0	0	0	0	0
OTU_44	OTU_44;D_0__Bacteria;D_1__Actinobacteria;D_2__Actinobacteria;D_3__Corynebacteriales;D_4__Corynebacteriaceae;D_5__Corynebacterium	k__Bacteria;p__Actinobacteria;c__Actinobacteria;o__Corynebacteriales;f__Corynebacteriaceae;g__Corynebacterium;s__durum			0.77		0	0.78	0.62	0.04	4.96	0	0.06	6.36	1.48	0.5	0.02	0.2	0	0.16	0	0.02	0	0.04	9.4	2.4	0	0	0.12	0.06	0	1.96	0.08	0.04	0.18	0.02	1.24	0.04	0.04	4.12	1.78	0.68	1.26	1.62	0.52	0.72	0.54	0.18	1.3
OTU_440	OTU_440;D_0__Bacteria;D_1__Spirochaetae;D_2__Spirochaetes;D_3__Spirochaetales;D_4__Spirochaetaceae;D_5__Treponema	k__Bacteria;p__Spirochaetes;c__Spirochaetia;o__Spirochaetales;f__Spirochaetaceae;g__Treponema			0.014359		0	0	0	0	0	0	0	0	0	0	0	0	0	0	0	0	0	0	0	0	0	0.88	0	0	0	0	0	0	0	0.02	0	0	0	0	0	0	0	0	0	0	0	0	0
OTU_441	OTU_441;D_0__Bacteria;D_1__Bacteroidetes;D_2__Bacteroidia;D_3__Bacteroidales;D_4__Porphyromonadaceae;D_5__Paludibacter;D_6__unculturedbacterium	k__Bacteria;p__Bacteroidetes;c__Bacteroidia;o__Bacteroidales;f__Bacteroidales_[F-2];g__Bacteroidales_[G-2];s__sp._oral_taxon_274			0.00384615		0.08	0	0	0	0	0	0	0	0	0.02	0	0	0.02	0	0	0	0	0	0	0	0	0.02	0	0	0	0	0	0	0	0	0	0	0	0	0	0	0.02	0	0	0	0	0	0
OTU_442	OTU_442;D_0__Bacteria;D_1__Proteobacteria;D_2__Epsilonproteobacteria;D_3__Campylobacterales;D_4__Campylobacteraceae;D_5__Campylobacter	k__Bacteria;p__Proteobacteria;c__Epsilonproteobacteria;o__Campylobacterales;f__Campylobacteraceae;g__Campylobacter;(s__rectus/s__showae)			0.423846		0.04	1.58	0.02	0.52	0.06	0.1	0.16	0.06	0.18	0.1	1.12	0.06	0.6	0.1	0.1	0.22	3.28	0.12	0.02	3.38	0.5	1.94	0	0.44	1.46	0.04	0.1	0.96	0.58	0.82	0	0.04	0.2	0.04	0	0.9	0.1	0.3	0.04	0.12	0	0.02	0.42
OTU_443	OTU_443;D_0__Bacteria;D_1__Spirochaetae;D_2__Spirochaetes;D_3__Spirochaetales;D_4__Spirochaetaceae;D_5__Treponema;D_6__Treponemasp.III:F:AT004	k__Bacteria;p__Spirochaetes;c__Spirochaetia;o__Spirochaetales;f__Spirochaetaceae;g__Treponema			0.00153846		0	0	0	0	0	0	0	0	0	0	0	0	0	0	0	0	0	0	0	0	0	0.12	0	0	0	0	0	0	0	0	0	0	0	0	0	0	0	0	0	0	0	0	0
OTU_446	OTU_446;D_0__Bacteria;D_1__Proteobacteria;D_2__Gammaproteobacteria;D_3__Cardiobacteriales;D_4__Cardiobacteriaceae;D_5__Cardiobacterium	k__Bacteria;p__Proteobacteria;c__Gammaproteobacteria;o__Cardiobacteriales;f__Cardiobacteriaceae;g__Cardiobacterium;s__hominis			0.000512821		0	0	0	0	0	0	0	0	0	0	0	0	0	0	0	0	0	0	0	0	0	0	0	0	0	0	0	0	0	0	0	0	0	0	0.04	0	0	0	0	0	0	0	0
OTU_447	OTU_447;D_0__Bacteria;D_1__Actinobacteria;D_2__Actinobacteria;D_3__Corynebacteriales;D_4__Corynebacteriaceae;D_5__Corynebacterium;D_6__	k__Bacteria;p__Actinobacteria;c__Actinobacteria;o__Corynebacteriales;f__Corynebacteriaceae;g__Corynebacterium			0.00307692		0	0	0	0	0	0	0	0	0.04	0	0	0	0	0	0	0	0	0	0.02	0	0	0	0	0	0	0.02	0	0	0	0	0	0	0	0.02	0	0	0.02	0	0	0	0	0	0.02
OTU_45	OTU_45;D_0__Bacteria;D_1__Firmicutes;D_2__Negativicutes;D_3__Selenomonadales;D_4__Veillonellaceae;D_5__Selenomonas;D_6__	k__Bacteria;p__Firmicutes;c__Negativicutes;o__Selenomonadales;f__Veillonellaceae;g__Veillonellaceae_[G-1];(s__sp._oral_taxon_129/s__sp._oral_taxon_132/s__sp._oral_taxon_150)			0.63359		0.46	0	0	0.26	0.02	1.46	1.12	0	0.36	0.32	0	0.52	1.18	0.82	0.02	2.5	0.1	0	0	0	1.58	0.6	0.96	0.04	0.1	0	0	0.26	3.94	0.5	0.6	0.04	0.1	0	0	0	0.78	0	0	1.22	0	0	0
OTU_451	OTU_451;D_0__Bacteria;D_1__Firmicutes;D_2__Negativicutes;D_3__Selenomonadales;D_4__Veillonellaceae;D_5__uncultured;D_6__Selenomonassp.oralcloneJI021	k__Bacteria;p__Firmicutes;c__Negativicutes;o__Selenomonadales;f__Veillonellaceae;g__Selenomonas;s__sp._oral_taxon_501			0.00025641		0	0	0	0	0	0	0	0	0	0	0	0	0	0	0	0	0	0	0	0	0	0	0	0	0	0	0	0	0	0	0	0	0	0	0	0	0	0	0	0.02	0	0	0
OTU_452	OTU_452;D_0__Bacteria;D_1__Firmicutes;D_2__Clostridia;D_3__Clostridiales;D_4__FamilyXI;D_5__Parvimonas;D_6__	k__Bacteria;p__Firmicutes;c__Clostridia;o__Clostridiales;f__Peptoniphilaceae;g__Parvimonas;s__micra			0.00410256		0.04	0.02	0	0.02	0	0	0.02	0	0	0	0	0	0	0	0	0	0	0	0	0.02	0	0	0	0	0	0	0	0	0	0	0.02	0	0	0	0.02	0	0	0	0	0	0	0	0
OTU_454	OTU_454;D_0__Bacteria;D_1__Synergistetes;D_2__Synergistia;D_3__Synergistales;D_4__Synergistaceae	k__Bacteria;p__Synergistetes;c__Synergistia;o__Synergistales;f__Synergistaceae;g__Fretibacterium			0.0771795		0	0	0	0	0	0	0	0	0.04	0	0	0	0	0	0	0.1	0.1	0	0	0	0.3	0.26	0	0	0.42	0	0	0	0.16	0.18	0	0.04	0	0	0	0	0	0	0	0.14	0	0.02	0
OTU_459	OTU_459;D_0__Bacteria;D_1__Proteobacteria;D_2__Betaproteobacteria;D_3__Neisseriales;D_4__Neisseriaceae	k__Bacteria;p__Proteobacteria;c__Betaproteobacteria;o__Neisseriales;f__Neisseriaceae			0.0197436		0	0	0	0	0	1.1	0	0	0	0	0	0	0	0	0	0	0	0	0	0	0	0	0	0	0	0.04	0	0	0	0	0	0	0	0	0	0.02	0	0.04	0	0.08	0	0	0.08
OTU_46	OTU_46;D_0__Bacteria;D_1__Bacteroidetes;D_2__Flavobacteriia;D_3__Flavobacteriales;D_4__Flavobacteriaceae;D_5__Capnocytophaga	k__Bacteria;p__Bacteroidetes;c__Flavobacteriia;o__Flavobacteriales;f__Flavobacteriaceae;g__Capnocytophaga;s__sputigena			0.371795		0.06	3.02	0	0.94	0	0	0.32	0.5	0	1.18	0.14	0.7	0	0	0.06	0	0	0.08	0.64	0.02	0	0	0	0.12	0	1.88	4.06	0	0.44	0	0.02	0	0.56	0.02	0.38	0.1	0.08	4.16	0.9	0	0	0.04	1.04
OTU_464	OTU_464;D_0__Bacteria;D_1__Bacteroidetes;D_2__Flavobacteriia;D_3__Flavobacteriales;D_4__Flavobacteriaceae;D_5__Capnocytophaga	k__Bacteria;p__Bacteroidetes;c__Flavobacteriia;o__Flavobacteriales;f__Flavobacteriaceae;g__Capnocytophaga			0.0025641		0	0	0	0	0	0	0.02	0	0	0	0	0	0	0	0	0	0	0	0	0	0	0	0	0	0	0	0	0	0.06	0	0	0	0	0	0	0	0	0	0.08	0	0	0	0
OTU_467	OTU_467;D_0__Bacteria;D_1__Firmicutes;D_2__Negativicutes;D_3__Selenomonadales;D_4__Veillonellaceae;D_5__Veillonella;D_6__unculturedVeillonellasp.	k__Bacteria;p__Firmicutes;c__Negativicutes;o__Selenomonadales;f__Veillonellaceae;g__Veillonella;s__sp._oral_taxon_917			0.00025641		0	0	0	0	0	0	0	0	0	0	0	0	0	0	0	0	0	0	0	0	0	0	0	0	0	0	0	0	0	0	0	0	0	0	0	0	0	0	0	0	0	0	0
OTU_469	OTU_469;D_0__Bacteria;D_1__Actinobacteria;D_2__Actinobacteria;D_3__Bifidobacteriales;D_4__Bifidobacteriaceae;D_5__Alloscardovia;D_6__unculturedbacterium	k__Bacteria;p__Actinobacteria;c__Actinobacteria;o__Bifidobacteriales;f__Bifidobacteriaceae;g__Alloscardovia;s__omnicolens			0.000512821		0	0	0	0	0	0	0	0	0	0	0	0	0	0	0	0	0	0	0	0	0.04	0	0	0	0	0	0	0	0	0	0	0	0	0	0	0	0	0	0	0	0	0	0
OTU_47	OTU_47;D_0__Bacteria;D_1__Actinobacteria;D_2__Actinobacteria;D_3__Actinomycetales;D_4__Actinomycetaceae;D_5__Actinomyces	k__Bacteria;p__Actinobacteria;c__Actinobacteria;o__Actinomycetales;f__Actinomycetaceae;g__Actinomyces;s__gerencseriae			1.46077		0.24	0.24	0.52	0.2	3.8	0.56	0.68	5.32	1.38	1.28	0.4	0.38	0.84	1.62	1.58	0.94	0.24	1.5	6.68	1.2	1.28	0.44	1.08	0.82	0.12	5.52	0.12	0.7	2.22	0.68	1.36	0.46	1.32	3.9	4.8	1.24	3.52	0.8	2.22	0.54	3.14	1.82	2.64
OTU_470	OTU_470;D_0__Bacteria;D_1__Fusobacteria;D_2__Fusobacteriia;D_3__Fusobacteriales;D_4__Fusobacteriaceae;D_5__Fusobacterium	k__Bacteria;p__Fusobacteria;c__Fusobacteriia;o__Fusobacteriales;f__Fusobacteriaceae;g__Fusobacterium			0.00717949		0	0	0	0	0	0	0	0	0	0	0	0	0	0.04	0	0	0	0	0	0	0	0.02	0.02	0	0	0	0	0	0.06	0	0	0	0.02	0	0	0	0	0	0	0.02	0	0	0
OTU_472	OTU_472;D_0__Bacteria;D_1__Spirochaetae;D_2__Spirochaetes;D_3__Spirochaetales;D_4__Spirochaetaceae;D_5__Treponema;D_6__Treponemamediumsubsp.bovis	k__Bacteria;p__Spirochaetes;c__Spirochaetia;o__Spirochaetales;f__Spirochaetaceae;g__Treponema			0.00230769		0	0	0	0.02	0	0	0	0	0	0	0	0	0	0	0	0.02	0	0	0	0	0	0.04	0	0	0	0	0	0.02	0	0	0	0	0	0	0	0	0	0	0	0	0	0	0
OTU_478	OTU_478;D_0__Bacteria;D_1__Firmicutes;D_2__Negativicutes;D_3__Selenomonadales;D_4__Veillonellaceae	k__Bacteria;p__Firmicutes;c__Negativicutes;o__Selenomonadales;f__Veillonellaceae			0.00153846		0	0	0	0	0	0	0	0	0	0	0	0	0	0	0	0	0	0	0	0	0	0	0	0	0	0	0	0	0	0	0	0	0.04	0	0	0.02	0	0	0	0	0	0	0
OTU_479	OTU_479;D_0__Bacteria;D_1__CandidatedivisionTM7;D_2__UnknownClass;D_3__UnknownOrder;D_4__UnknownFamily;D_5__CandidatusSaccharimonas;D_6__unculturedbacterium	k__Bacteria;p__Saccharibacteria_(TM7);c__TM7_[C-1];o__TM7_[O-1];f__TM7_[F-1];g__TM7_[G-3];s__sp._oral_taxon_351			0.00128205		0	0	0	0	0	0	0	0	0	0	0	0	0	0	0	0	0	0	0	0	0	0	0	0	0	0	0	0	0	0.02	0	0	0	0	0	0	0	0	0	0	0	0	0
OTU_48	OTU_48;D_0__Bacteria;D_1__Bacteroidetes;D_2__Flavobacteriia;D_3__Flavobacteriales;D_4__Flavobacteriaceae;D_5__Capnocytophaga;D_6__unculturedbacterium	k__Bacteria;p__Bacteroidetes;c__Flavobacteriia;o__Flavobacteriales;f__Flavobacteriaceae;g__Capnocytophaga;s__sp._oral_taxon_326			0.606154		1.94	0	1.86	0.04	0	0	0.34	0	0.4	0	2.12	0.04	0	2.02	0	0.42	0.06	0.32	0.18	0.1	0	0	0	0.08	0	0.04	2.82	0.08	0.34	0	0.16	0	0	9.26	0.5	0.5	1.16	1.02	2.5	0	3.12	0.06	3.08
OTU_482	OTU_482;D_0__Bacteria;D_1__Actinobacteria;D_2__Actinobacteria;D_3__Corynebacteriales;D_4__Corynebacteriaceae;D_5__Corynebacterium;D_6__	k__Bacteria;p__Actinobacteria;c__Actinobacteria;o__Corynebacteriales;f__Corynebacteriaceae;g__Corynebacterium			0.0948718		0	0.3	0.12	0.02	0	0	0	0.54	0.36	0.06	0.04	0.06	0	0.06	0	0	0	0.04	0.96	0.04	0	0	0.02	0.02	0	0.38	0	0	0	0	0.04	0.02	0	0.46	0	0.38	0.22	0.14	0.06	0.28	0.04	0.04	0.38
OTU_483	OTU_483;D_0__Bacteria;D_1__Firmicutes;D_2__Negativicutes;D_3__Selenomonadales;D_4__Veillonellaceae;D_5__Dialister;D_6__	k__Bacteria;p__Firmicutes;c__Negativicutes;o__Selenomonadales;f__Veillonellaceae;g__Dialister;s__invisus			0.00102564		0	0	0	0	0	0	0	0	0	0	0	0	0	0	0	0	0	0	0	0	0	0	0	0	0	0	0	0.02	0	0	0	0	0	0	0	0	0	0	0	0	0	0	0
OTU_49	OTU_49;D_0__Bacteria;D_1__Bacteroidetes;D_2__Bacteroidia;D_3__Bacteroidales;D_4__Prevotellaceae;D_5__Prevotella	k__Bacteria;p__Bacteroidetes;c__Bacteroidia;o__Bacteroidales;f__Prevotellaceae;g__Prevotella			0.771282		0.02	0.06	0.3	0.7	0	0.16	0.64	0	0.06	0.14	1.8	1.16	0	0.14	23.44	0.14	0.84	1.06	0	0.04	0.94	0	0.04	1.04	0.12	0	0.42	6.28	0.04	0.08	0	0.14	0	0	0.06	0	0.04	0.06	2.94	0.9	0.12	0.52	0
OTU_491	OTU_491;D_0__Bacteria;D_1__Bacteroidetes;D_2__Bacteroidia;D_3__Bacteroidales;D_4__Prevotellaceae;D_5__Prevotella;D_6__Prevotellapallens	k__Bacteria;p__Bacteroidetes;c__Bacteroidia;o__Bacteroidales;f__Prevotellaceae;g__Prevotella;s__pallens			0.0276923		0	0	0	0	0	0	0	0	0	0.66	0	0	0.16	0.08	0	0	0	1.04	0	0	0.02	0	0	0	0.04	0	0.04	0	0	0	0	0	0	0	0	0	0	0	0	0	0	0.02	0
OTU_493	OTU_493;D_0__Bacteria;D_1__Firmicutes;D_2__Negativicutes;D_3__Selenomonadales;D_4__Veillonellaceae;D_5__Selenomonas	k__Bacteria;p__Firmicutes;c__Negativicutes;o__Selenomonadales;f__Veillonellaceae;g__Selenomonas;s__sp._oral_taxon_134			0.0182051		0	0	0	0.04	0	0	0	0	0	0	0	0	0	0	0.02	0.04	0.02	0.14	0	0	0	0.02	0.04	0	0.02	0	0.02	0.02	0.02	0	0	0.02	0.06	0	0.02	0	0.08	0	0.04	0	0	0	0
OTU_494	OTU_494;D_0__Bacteria;D_1__Proteobacteria;D_2__Alphaproteobacteria;D_3__Sphingomonadales;D_4__Sphingomonadaceae;D_5__Zymomonas;D_6__unculturedbacterium	k__Bacteria;p__Proteobacteria;c__Alphaproteobacteria			0.00102564		0	0	0	0	0	0	0	0	0	0	0	0	0	0	0	0	0	0	0	0	0	0	0	0	0	0	0	0	0	0	0	0	0	0	0	0	0	0	0	0	0	0	0
OTU_497	OTU_497;D_0__Bacteria;D_1__Synergistetes;D_2__Synergistia;D_3__Synergistales;D_4__Synergistaceae	k__Bacteria;p__Synergistetes;c__Synergistia;o__Synergistales;f__Synergistaceae;g__Fretibacterium;s__sp._oral_taxon_361			0.00025641		0	0	0	0	0	0	0	0	0	0	0	0	0	0	0	0	0	0	0	0	0	0	0	0	0	0	0	0	0	0	0.02	0	0	0	0	0	0	0	0	0	0	0	0
OTU_498	OTU_498;D_0__Bacteria;D_1__Spirochaetae;D_2__Spirochaetes;D_3__Spirochaetales;D_4__Spirochaetaceae;D_5__Treponema	k__Bacteria;p__Spirochaetes;c__Spirochaetia;o__Spirochaetales;f__Spirochaetaceae;g__Treponema;s__socranskii			0.00025641		0	0	0	0	0	0	0	0	0	0	0	0	0	0	0	0	0	0	0	0	0	0	0	0	0	0	0	0	0	0	0	0	0	0	0	0	0	0	0	0	0	0	0
OTU_499	OTU_499;D_0__Bacteria;D_1__Firmicutes;D_2__Negativicutes;D_3__Selenomonadales;D_4__Veillonellaceae;D_5__Selenomonas	k__Bacteria;p__Firmicutes;c__Negativicutes;o__Selenomonadales;f__Veillonellaceae			0.0212821		0	0	0	0	0	0	0.06	0	0	0.04	0.02	0	0	0.02	0	0.02	0	0.02	0.02	0.02	0	0	0	0.1	0	0	0.02	0	0	0.02	0.02	0	0.02	0	0.04	0.02	0.04	0.02	0.04	0	0.02	0	0
OTU_5	OTU_5;D_0__Bacteria;D_1__Firmicutes;D_2__Negativicutes;D_3__Selenomonadales;D_4__Veillonellaceae;D_5__Veillonella;D_6__unculturedbacterium	k__Bacteria;p__Firmicutes;c__Negativicutes;o__Selenomonadales;f__Veillonellaceae;g__Veillonella			3.26		1.5	0.98	4.06	2.48	34.54	3.8	2.1	6.26	2.04	21.76	2.02	2.1	0.12	0.2	1.36	0.04	3.28	1.86	0.76	1.94	0.8	0.04	0.74	1.18	0.04	10.12	0.78	0.44	0.24	3.52	0.4	4.74	0.6	1.44	0.38	1.44	0.72	12.24	0.54	0.74	13.9	27.84	0.18
OTU_50	OTU_50;D_0__Bacteria;D_1__Fusobacteria;D_2__Fusobacteriia;D_3__Fusobacteriales;D_4__Leptotrichiaceae;D_5__Leptotrichia;D_6__unculturedbacterium	k__Bacteria;p__Fusobacteria;c__Fusobacteriia;o__Fusobacteriales;f__Leptotrichiaceae;g__Leptotrichia;s__sp._oral_taxon_498			0.648718		0.04	0	0	0.02	0	0	4.64	0	0	1.9	0.14	0	0	1.52	0.06	0	0	0.2	0	0.02	0.04	0.04	0	0.96	0.04	0	0.06	1.52	0	0	0	0.08	2.58	0	0	1.26	0.42	0	0.94	0	0	0	0
OTU_500	OTU_500;D_0__Bacteria;D_1__Actinobacteria;D_2__Actinobacteria;D_3__Actinomycetales;D_4__Actinomycetaceae;D_5__Actinomyces	k__Bacteria;p__Actinobacteria;c__Actinobacteria;o__Actinomycetales;f__Actinomycetaceae;g__Actinomyces;s__sp._oral_taxon_448			0.0187179		0	0	0.06	0	0	0	0.02	0	0	0.14	0	0.02	0	0	0	0	0	0.02	0	0.06	0.02	0	0	0	0	0	0.02	0	0	0	0.04	0.12	0	0	0	0	0.06	0	0.02	0	0.02	0.02	0
OTU_506	OTU_506;D_0__Bacteria;D_1__Bacteroidetes;D_2__Flavobacteriia;D_3__Flavobacteriales;D_4__Flavobacteriaceae;D_5__Capnocytophaga;D_6__unculturedbacterium	k__Bacteria;p__Bacteroidetes;c__Flavobacteriia;o__Flavobacteriales;f__Flavobacteriaceae;g__Capnocytophaga;s__leadbetteri			0.0120513		0.08	0	0	0	0.16	0	0	0	0.04	0	0	0	0	0	0	0	0	0.06	0	0	0	0	0	0	0	0	0.04	0	0.02	0	0	0	0	0	0	0.02	0	0.34	0.02	0	0	0	0.02
OTU_509	OTU_509;D_0__Bacteria;D_1__Firmicutes;D_2__Negativicutes;D_3__Selenomonadales;D_4__Veillonellaceae	k__Bacteria;p__Firmicutes;c__Negativicutes;o__Selenomonadales;f__Veillonellaceae			0.0110256		0	0	0	0	0	0	0	0	0.1	0.04	0.02	0	0	0.04	0	0	0	0	0.02	0	0.02	0	0.04	0.02	0	0.02	0	0	0	0	0	0	0.02	0	0.04	0.02	0.02	0	0.04	0.02	0	0	0
OTU_51	OTU_51;D_0__Bacteria;D_1__Fusobacteria;D_2__Fusobacteriia;D_3__Fusobacteriales;D_4__Leptotrichiaceae;D_5__Leptotrichia;D_6__unculturedbacterium	k__Bacteria;p__Fusobacteria;c__Fusobacteriia;o__Fusobacteriales;f__Leptotrichiaceae;g__Leptotrichia;s__hongkongensis			0.875641		0	0	1.32	2.5	1.22	1.94	0.68	0.42	1.7	3.16	0.38	1.4	0.08	0.04	0.9	0.12	0.02	0.6	0.88	0.18	0.08	0	0.44	0.02	0	0.06	0.18	0.14	0.08	1.14	0	0.3	5.4	3.46	0.08	1.62	0.12	1.24	0.08	1.12	0.68	0.02	0.16
OTU_510	OTU_510;D_0__Bacteria;D_1__Actinobacteria;D_2__Actinobacteria;D_3__Actinomycetales;D_4__Actinomycetaceae;D_5__Actinomyces	k__Bacteria;p__Actinobacteria;c__Actinobacteria;o__Actinomycetales;f__Actinomycetaceae;g__Actinomyces;s__cardiffensis			0.0266667		0	0	0	0	0	0.02	0.02	0	0	0.02	0	0.02	0.08	0.04	0	0	0.02	0.02	0	0	0.02	0.46	0	0	0.26	0	0	0	0	0	0.02	0	0	0	0	0	0.04	0	0.02	0.02	0	0	0.02
OTU_514	OTU_514;D_0__Bacteria;D_1__Proteobacteria;D_2__Betaproteobacteria;D_3__Neisseriales;D_4__Neisseriaceae	k__Bacteria;p__Proteobacteria;c__Betaproteobacteria;o__Neisseriales;f__Neisseriaceae;g__Neisseria			0.0276923		0	0.16	0	0.1	0	0	0	0.12	0	0	0	0	0	0	0	0	0	0.06	0.02	0.14	0	0	0	0	0	0.02	0.38	0	0	0	0	0	0.14	0	0	0.06	0	0	0	0	0	0	0.26
OTU_516	OTU_516;D_0__Bacteria;D_1__Firmicutes;D_2__Negativicutes;D_3__Selenomonadales;D_4__Veillonellaceae;D_5__Veillonella	k__Bacteria;p__Firmicutes;c__Negativicutes;o__Selenomonadales;f__Veillonellaceae;g__Veillonella			0.000512821		0	0	0	0	0	0	0	0	0	0	0	0	0	0	0	0	0	0	0	0	0	0	0	0	0	0	0	0	0	0.02	0	0	0	0	0	0	0	0	0	0	0	0	0
OTU_52	OTU_52;D_0__Bacteria;D_1__Bacteroidetes;D_2__Bacteroidia;D_3__Bacteroidales;D_4__Prevotellaceae;D_5__Prevotella;D_6__PrevotellamaculosaOT289	k__Bacteria;p__Bacteroidetes;c__Bacteroidia;o__Bacteroidales;f__Prevotellaceae;g__Prevotella;s__maculosa			0.440513		0.54	0.12	0	1.34	0	0.7	0.84	0	0.16	0.06	0.34	0.5	0	0.04	0.58	1.64	0.02	0.84	0	0.02	0.68	0.1	1.2	0.64	0.06	0	0.68	0.14	0.58	0.4	0.4	0.08	0.76	0.26	1.14	0.52	1.44	0.04	2.3	0.5	0.08	0.02	0
OTU_524	OTU_524;D_0__Bacteria;D_1__Actinobacteria;D_2__Actinobacteria;D_3__Corynebacteriales;D_4__Corynebacteriaceae;D_5__Corynebacterium;D_6__Corynebacteriummatruchotii	k__Bacteria;p__Actinobacteria;c__Actinobacteria;o__Corynebacteriales;f__Corynebacteriaceae;g__Corynebacterium;s__matruchotii			0.00282051		0	0	0	0	0	0	0	0	0	0	0	0	0	0	0	0	0	0	0	0	0	0	0	0	0	0	0	0	0	0	0	0	0	0	0	0.02	0	0	0	0	0	0	0.06
OTU_525	OTU_525;D_0__Bacteria;D_1__Firmicutes;D_2__Negativicutes;D_3__Selenomonadales;D_4__Veillonellaceae	k__Bacteria;p__Firmicutes;c__Negativicutes;o__Selenomonadales;f__Veillonellaceae			0.00102564		0	0	0	0	0	0	0	0	0	0	0	0.02	0	0	0	0	0	0	0	0	0	0	0	0	0	0	0	0	0	0	0	0	0	0	0	0.02	0	0	0	0	0	0	0
OTU_526	OTU_526;D_0__Bacteria;D_1__Bacteroidetes;D_2__Bacteroidia;D_3__Bacteroidales;D_4__Porphyromonadaceae;D_5__Paludibacter;D_6__unculturedbacterium	k__Bacteria;p__Bacteroidetes;c__Bacteroidia;o__Bacteroidales;f__Bacteroidales_[F-2];g__Bacteroidales_[G-2];s__sp._oral_taxon_274			0.000512821		0	0	0	0	0	0	0	0	0	0	0	0	0	0	0	0	0	0	0	0	0	0	0	0	0	0	0	0	0	0	0	0	0	0	0	0	0	0	0	0	0	0	0
OTU_528	OTU_528;D_0__Bacteria;D_1__Firmicutes;D_2__Negativicutes;D_3__Selenomonadales;D_4__Veillonellaceae;D_5__Selenomonas	k__Bacteria;p__Firmicutes;c__Negativicutes;o__Selenomonadales;f__Veillonellaceae;g__Selenomonas;s__sp._oral_taxon_134			0.000512821		0	0	0	0	0	0.02	0	0	0	0	0	0	0	0	0	0	0	0	0	0	0	0	0	0	0	0	0	0	0	0	0	0	0.02	0	0	0	0	0	0	0	0	0	0
OTU_53	OTU_53;D_0__Bacteria;D_1__Bacteroidetes;D_2__Bacteroidia;D_3__Bacteroidales;D_4__Prevotellaceae;D_5__Prevotella;D_6__Prevotellasp.oralcloneASCG12	k__Bacteria;p__Bacteroidetes;c__Bacteroidia;o__Bacteroidales;f__Prevotellaceae;g__Prevotella;(s__loescheii/s__sp._oral_taxon_472)			0.251795		0.72	0	0	0.9	0	0	1.16	0	0.32	0	1.34	0	0	0	0	0	0	0.1	0.5	0.06	0	0	0.1	0.04	0	0.74	0.5	0	0.06	0	1.42	0	0	0.62	0.06	0.3	0	2.04	0	0	0	0	0.12
OTU_530	OTU_530;D_0__Bacteria;D_1__Bacteroidetes;D_2__Bacteroidia;D_3__Bacteroidales	k__Bacteria;p__Bacteroidetes;c__Bacteroidia;o__Bacteroidales;f__Bacteroidaceae;g__Bacteroides			0.00025641		0	0	0	0	0	0	0	0.02	0	0	0	0	0	0	0	0	0	0	0	0	0	0	0	0	0	0	0	0	0	0	0	0	0	0	0	0	0	0	0	0	0	0	0
OTU_533	OTU_533;D_0__Bacteria;D_1__Actinobacteria;D_2__Coriobacteriia;D_3__Coriobacteriales;D_4__Coriobacteriaceae;D_5__Atopobium	k__Bacteria;p__Actinobacteria;c__Coriobacteriia;o__Coriobacteriales;f__Coriobacteriaceae;g__Atopobium			0.00025641		0	0	0	0	0	0	0	0	0	0	0	0	0	0	0	0	0	0	0	0	0	0	0	0	0	0	0	0	0	0	0	0	0	0	0	0	0	0	0	0	0	0	0
OTU_536	OTU_536;D_0__Bacteria;D_1__Proteobacteria;D_2__Deltaproteobacteria;D_3__Desulfovibrionales;D_4__Desulfovibrionaceae;D_5__Desulfovibrio	k__Bacteria;p__Proteobacteria;c__Deltaproteobacteria;o__Desulfovibrionales;f__Desulfovibrionaceae;g__Desulfovibrio;s__sp._oral_taxon_040			0.0197436		0	0	0	0	0	0	0	0	0	0	0	0	0	0	0	0	0	0	0	0	0	0	0	0	0	0	0	0	0	0	0	0	0	0	0	0	0	0	0	0.24	0	0	0
OTU_54	OTU_54;D_0__Bacteria;D_1__Actinobacteria;D_2__Actinobacteria;D_3__Bifidobacteriales;D_4__Bifidobacteriaceae;D_5__Bifidobacterium	k__Bacteria;p__Actinobacteria;c__Actinobacteria;o__Bifidobacteriales;f__Bifidobacteriaceae;g__Bifidobacterium;s__dentium			0.43641		0	0	0	0	0	0.54	0	0	0.02	0.1	0	0.02	0.24	0.18	0	0	0.14	0	0.02	0	0.02	0.06	0.02	0	0	0	0	1.46	0	0.1	0.04	0	0.42	0	0	0	0	0	0.02	0.02	0	0	0
OTU_543	OTU_543;D_0__Bacteria;D_1__Firmicutes;D_2__Negativicutes;D_3__Selenomonadales;D_4__Veillonellaceae;D_5__Selenomonas	k__Bacteria;p__Firmicutes;c__Negativicutes;o__Selenomonadales;f__Veillonellaceae			0.00102564		0	0	0	0	0	0	0	0	0	0	0	0	0	0	0	0	0	0	0	0	0	0	0	0	0	0	0	0	0	0	0	0	0	0	0	0	0.02	0	0	0	0	0	0
OTU_544	OTU_544;D_0__Bacteria;D_1__Firmicutes;D_2__Negativicutes;D_3__Selenomonadales;D_4__Veillonellaceae;D_5__Selenomonas;D_6__	k__Bacteria;p__Firmicutes;c__Negativicutes;o__Selenomonadales;f__Veillonellaceae			0.0371795		0	0	0	0.04	0	0	0	0	0.02	0.02	0	0	0	0.04	0.04	0.18	0	0.02	0	0	0	0.02	0.08	0.2	0.02	0	0.02	0.08	0.06	0.04	0	0.02	0.02	0	0.04	0	0.16	0	0	0.02	0	0	0
OTU_545	OTU_545;D_0__Bacteria;D_1__Bacteroidetes;D_2__Flavobacteriia;D_3__Flavobacteriales;D_4__Flavobacteriaceae;D_5__Capnocytophaga;D_6__unculturedbacterium	k__Bacteria;p__Bacteroidetes;c__Flavobacteriia;o__Flavobacteriales;f__Flavobacteriaceae;g__Capnocytophaga;s__leadbetteri			0.00589744		0	0	0.02	0.02	0	0	0	0	0	0	0.04	0	0	0	0	0.02	0	0	0	0	0	0	0.02	0	0	0	0.06	0	0.04	0	0	0	0	0	0	0	0	0.02	0	0	0	0	0
OTU_546	OTU_546;D_0__Bacteria;D_1__Firmicutes;D_2__Negativicutes;D_3__Selenomonadales;D_4__Veillonellaceae;D_5__Selenomonas	k__Bacteria;p__Firmicutes;c__Negativicutes;o__Selenomonadales;f__Veillonellaceae;g__Veillonellaceae_[G-1]			0.0425641		0	0	0	0	0	0	0.04	0	0.06	0	0	0	0.62	1.22	0	0.08	0.04	0.02	0	0	0.06	0	0.02	0	0	0	0	0.04	0.06	0	0.02	0.04	0.02	0	0	0	0.02	0	0	0.04	0	0	0
OTU_547	OTU_547;D_0__Bacteria;D_1__Actinobacteria;D_2__Actinobacteria;D_3__Actinomycetales;D_4__Actinomycetaceae;D_5__Actinomyces;D_6__unculturedbacterium	k__Bacteria;p__Actinobacteria;c__Actinobacteria;o__Actinomycetales;f__Actinomycetaceae;g__Actinomyces;s__massiliensis			0.034359		0	0.02	0.02	0	0	0.02	0.02	0.18	0.06	0	0	0	0	0	0	0.02	0	0.04	0.3	0	0	0	0.02	0	0	0.08	0	0	0	0	0.02	0	0.02	0.14	0.04	0.02	0.08	0.04	0	0	0.12	0.06	0.1
OTU_548	OTU_548;D_0__Bacteria;D_1__Actinobacteria;D_2__Coriobacteriia;D_3__Coriobacteriales;D_4__Coriobacteriaceae	k__Bacteria;p__Actinobacteria;c__Coriobacteriia;o__Coriobacteriales;f__Atopobiaceae;g__Olsenella;s__profusa			0.0110256		0	0	0	0	0	0	0	0	0	0	0	0	0	0	0	0	0	0	0	0	0	0	0	0	0	0	0	0	0	0	0	0	0	0	0	0	0	0	0	0	0	0	0
OTU_549	OTU_549;D_0__Bacteria;D_1__Proteobacteria;D_2__Deltaproteobacteria;D_3__Desulfobacterales;D_4__Desulfobulbaceae;D_5__Desulfobulbus;D_6__	k__Bacteria;p__Proteobacteria;c__Deltaproteobacteria;o__Desulfobacterales;f__Desulfobulbaceae;g__Desulfobulbus;s__sp._oral_taxon_041			0.000512821		0	0	0	0	0	0	0	0	0	0	0	0	0	0	0	0	0	0	0	0	0	0	0	0	0	0	0	0	0	0.02	0	0	0	0	0	0	0	0	0	0	0	0	0
OTU_550	OTU_550;D_0__Bacteria;D_1__Firmicutes;D_2__Negativicutes;D_3__Selenomonadales;D_4__Veillonellaceae	k__Bacteria;p__Firmicutes;c__Negativicutes;o__Selenomonadales;f__Veillonellaceae			0.0153846		0	0	0	0.06	0	0	0	0	0	0	0.02	0	0	0.06	0	0.02	0	0.02	0	0	0	0	0.02	0.06	0	0	0	0	0	0	0	0	0.12	0	0.06	0.04	0.04	0	0.06	0	0	0	0
OTU_551	OTU_551;D_0__Bacteria;D_1__Actinobacteria;D_2__Actinobacteria;D_3__Actinomycetales;D_4__Actinomycetaceae;D_5__Actinomyces;D_6__	k__Bacteria;p__Actinobacteria;c__Actinobacteria;o__Actinomycetales;f__Actinomycetaceae;g__Actinomyces;s__dentalis			0.101026		0	0	0	0.02	0	0	0.06	0	0.04	0.08	0.06	0	0.04	0.2	0	0.12	0	0.24	0	0.02	0	0	0.04	0.06	0.04	0.02	0.02	0.1	0.06	0.04	0.02	0	0.04	0	0	0.14	0.12	0	0.08	0.02	0	0.02	0.08
OTU_552	OTU_552;D_0__Bacteria;D_1__Spirochaetae;D_2__Spirochaetes;D_3__Spirochaetales;D_4__Spirochaetaceae;D_5__Treponema	k__Bacteria;p__Spirochaetes;c__Spirochaetia;o__Spirochaetales;f__Spirochaetaceae;g__Treponema;s__sp._oral_taxon_230			0.000769231		0	0	0	0	0	0	0	0	0	0	0	0	0	0	0	0	0	0	0	0	0	0.02	0	0	0	0	0	0	0	0	0	0	0	0	0	0	0	0	0	0	0	0	0
OTU_553	OTU_553;D_0__Bacteria;D_1__Bacteroidetes;D_2__Bacteroidia;D_3__Bacteroidales;D_4__Porphyromonadaceae;D_5__Tannerella;D_6__Tannerellaforsythia	k__Bacteria;p__Bacteroidetes;c__Bacteroidia;o__Bacteroidales;f__Porphyromonadaceae;g__Tannerella;s__forsythia			0.00128205		0	0	0	0	0	0	0	0	0	0	0	0	0	0	0	0	0	0	0	0.02	0	0	0	0	0	0	0	0	0	0	0	0	0	0	0	0	0	0	0	0	0	0	0
OTU_554	OTU_554;D_0__Bacteria;D_1__Bacteroidetes;D_2__Bacteroidia;D_3__Bacteroidales;D_4__Prevotellaceae;D_5__Prevotella	k__Bacteria;p__Bacteroidetes;c__Bacteroidia;o__Bacteroidales;f__Prevotellaceae;g__Prevotella;s__veroralis			0.0846154		0	0	0	0	0	0.04	0.06	0	0	0	0	0	0	0	0.04	0	0	0.04	0	0	0	0	0	0.02	0.34	0	0.5	0	0	0	0	0	0	0	0	0	0	0	0.26	0	0	0.14	0
OTU_556	OTU_556;D_0__Bacteria;D_1__Actinobacteria;D_2__Coriobacteriia;D_3__Coriobacteriales;D_4__Coriobacteriaceae;D_5__Atopobium	k__Bacteria;p__Actinobacteria;c__Coriobacteriia;o__Coriobacteriales;f__Coriobacteriaceae;g__Atopobium;s__parvulum			0.0251282		0.08	0	0	0	0	0	0	0	0	0.08	0	0.06	0	0	0.16	0	0.1	0.1	0	0	0	0	0	0	0	0	0	0.02	0	0	0.06	0.02	0	0	0	0	0	0	0.02	0	0.04	0.18	0
OTU_557	OTU_557;D_0__Bacteria;D_1__Proteobacteria;D_2__Deltaproteobacteria;D_3__Desulfovibrionales;D_4__Desulfohalobiaceae;D_5__Desulfovermiculus;D_6__unculturedbacterium	k__Bacteria;p__Proteobacteria			0.000512821		0	0	0	0	0	0	0	0	0	0	0	0	0	0	0	0	0	0	0	0	0	0	0	0	0	0	0	0	0	0	0	0	0	0	0	0	0	0	0	0	0	0	0
OTU_558	OTU_558;D_0__Bacteria;D_1__Actinobacteria;D_2__Actinobacteria;D_3__Actinomycetales;D_4__Actinomycetaceae;D_5__Actinobaculum	k__Bacteria;p__Actinobacteria;c__Actinobacteria;o__Actinomycetales;f__Actinomycetaceae;g__Actinobaculum;s__sp._oral_taxon_183			0.00025641		0	0	0	0	0	0	0	0	0	0	0	0	0	0	0	0	0	0	0	0	0	0	0	0	0	0	0	0.02	0	0	0	0	0	0	0	0	0	0	0	0	0	0	0
OTU_559	OTU_559;D_0__Bacteria;D_1__Firmicutes;D_2__Negativicutes;D_3__Selenomonadales;D_4__Veillonellaceae;D_5__Selenomonas;D_6__	k__Bacteria;p__Firmicutes;c__Negativicutes;o__Selenomonadales;f__Veillonellaceae;g__Veillonellaceae_[G-1];(s__sp._oral_taxon_129/s__sp._oral_taxon_132/s__sp._oral_taxon_150)			0.00025641		0	0	0	0	0	0	0	0	0	0	0	0	0	0	0	0	0	0	0	0	0	0	0	0	0	0	0	0	0	0	0	0	0	0	0	0	0	0	0	0	0	0	0
OTU_56	OTU_56;D_0__Bacteria;D_1__Firmicutes;D_2__Clostridia;D_3__Clostridiales;D_4__FamilyXIII;D_5__IncertaeSedis;D_6__unculturedorganism	k__Bacteria;p__Firmicutes;c__Clostridia;o__Clostridiales;f__Peptostreptococcaceae_[XI];g__Peptostreptococcaceae_[XI][G-9];s__[Eubacterium]_brachy			0.132564		0.02	0	0	0.16	0	0.08	0.08	0.02	0.02	0	0	0.12	0.08	0.06	0	0	0.06	0.14	0.04	1.1	0.34	0.04	0.34	0.08	0.12	0.04	0	0.12	0.26	0.14	0.04	0.06	0	0.06	0.08	0	0.02	0.02	0.08	0.06	0	0.02	0
OTU_563	OTU_563;D_0__Bacteria	k__Bacteria			0.00025641		0	0	0	0	0	0	0	0	0	0	0	0	0	0	0	0	0	0	0	0	0	0	0	0	0	0	0	0	0	0	0	0	0	0	0	0	0	0	0	0	0	0	0
OTU_565	OTU_565;D_0__Bacteria;D_1__Actinobacteria;D_2__Coriobacteriia;D_3__Coriobacteriales;D_4__Coriobacteriaceae;D_5__Atopobium	k__Bacteria;p__Actinobacteria;c__Coriobacteriia;o__Coriobacteriales;f__Coriobacteriaceae;g__Atopobium			0.00615385		0	0	0	0	0	0.02	0	0	0	0	0	0	0	0	0	0	0	0	0	0	0.02	0	0	0	0	0	0	0.12	0	0	0.02	0	0	0	0	0	0	0	0	0	0	0	0
OTU_567	OTU_567;D_0__Bacteria;D_1__Bacteroidetes;D_2__Bacteroidia;D_3__Bacteroidales;D_4__Porphyromonadaceae;D_5__Tannerella;D_6__Tannerellaforsythia	k__Bacteria;p__Bacteroidetes;c__Bacteroidia;o__Bacteroidales;f__Porphyromonadaceae;g__Tannerella;s__forsythia			0.000512821		0	0	0	0	0	0	0	0	0	0	0	0	0	0	0	0	0	0	0	0	0	0	0	0	0	0	0	0	0	0	0	0	0	0	0	0	0	0	0	0	0	0	0
OTU_57	OTU_57;D_0__Bacteria;D_1__Firmicutes;D_2__Bacilli;D_3__Bacillales;D_4__FamilyXI;D_5__Gemella;D_6__unculturedbacterium	k__Bacteria;p__Firmicutes;c__Bacilli;o__Bacillales;f__Gemellaceae;g__Gemella;(s__haemolysans/s__morbillorum/s__sanguinis)			0.142051		0	0.02	0	0.38	0.06	0	0.06	0.58	0	0.02	0.22	0.22	0.12	0.06	0	0	0.14	0.26	0.12	0.14	0	0.02	0.02	0.02	0.14	0.16	0.46	0.22	0.38	0	0	0.04	0.04	0.04	0.38	0	0.06	0.36	0.12	0	0	0.02	0.44
OTU_570	OTU_570;D_0__Bacteria;D_1__Proteobacteria;D_2__Betaproteobacteria;D_3__Neisseriales;D_4__Neisseriaceae	k__Bacteria;p__Proteobacteria;c__Betaproteobacteria			0.00846154		0	0.04	0	0	0	0	0	0	0	0	0	0	0	0	0	0	0	0	0	0	0	0	0	0	0	0.04	0.2	0	0	0	0	0	0	0	0	0.02	0	0.1	0	0	0	0	0.06
OTU_571	OTU_571;D_0__Bacteria;D_1__Firmicutes;D_2__Negativicutes;D_3__Selenomonadales;D_4__Veillonellaceae;D_5__Veillonella	k__Bacteria;p__Firmicutes;c__Negativicutes;o__Selenomonadales;f__Veillonellaceae;g__Veillonella			0.00128205		0	0.02	0.02	0	0	0	0	0	0	0.02	0	0	0	0	0	0	0	0	0	0	0	0	0	0	0	0.02	0	0	0	0	0	0	0	0	0	0	0	0	0	0	0.02	0	0
OTU_572	OTU_572;D_0__Bacteria;D_1__Tenericutes;D_2__Mollicutes;D_3__RF9;D_4__FirmicutesoralcloneFM046;D_5__FirmicutesoralcloneFM046;D_6__FirmicutesoralcloneFM046	k__Bacteria			0.00025641		0	0	0	0	0	0	0	0	0	0	0	0	0	0	0	0	0	0	0	0	0	0	0	0	0	0	0	0	0	0	0	0	0	0	0	0	0	0	0	0	0	0	0
OTU_576	OTU_576;D_0__Bacteria;D_1__Firmicutes;D_2__Negativicutes;D_3__Selenomonadales;D_4__Veillonellaceae;D_5__Selenomonas;D_6__	k__Bacteria;p__Firmicutes;c__Negativicutes;o__Selenomonadales;f__Veillonellaceae;g__Selenomonas			0.000512821		0	0	0	0	0	0	0	0	0	0	0	0	0	0	0	0	0	0	0	0	0	0	0	0	0	0	0	0	0	0	0	0	0	0	0	0	0	0	0	0	0	0	0.02
OTU_577	OTU_577;D_0__Bacteria;D_1__Firmicutes;D_2__Clostridia;D_3__Clostridiales;D_4__Lachnospiraceae;D_5__Lachnoanaerobaculum;D_6__unculturedbacterium	k__Bacteria;p__Firmicutes;c__Clostridia;o__Clostridiales;f__Lachnospiraceae_[XIV];g__Lachnoanaerobaculum;s__saburreum			0.00435897		0	0	0	0	0	0.02	0	0	0	0	0	0	0	0.02	0	0	0	0	0	0	0	0	0	0	0	0	0	0.02	0	0	0	0	0.04	0	0	0	0	0	0.04	0	0	0	0
OTU_58	OTU_58;D_0__Bacteria;D_1__Spirochaetae;D_2__Spirochaetes;D_3__Spirochaetales;D_4__Spirochaetaceae;D_5__Treponema;D_6__Treponemamediumsubsp.bovis	k__Bacteria;p__Spirochaetes;c__Spirochaetia;o__Spirochaetales;f__Spirochaetaceae;g__Treponema			0.421538		0	0	0	3.18	0	0.12	0.02	0.06	1.16	0	0.1	0.04	0	0	0	1.92	1.28	0.08	0.04	0.16	0.3	3.34	0	0.2	0.48	0.02	0.24	0.64	1.36	0	0.6	0.04	0	0	0	0	0.48	0	0	0	0	0	0
OTU_585	OTU_585;D_0__Bacteria;D_1__Actinobacteria;D_2__Actinobacteria;D_3__Micrococcales;D_4__Micrococcaceae;D_5__Rothia;D_6__unculturedbacterium	k__Bacteria;p__Actinobacteria;c__Actinobacteria;o__Actinomycetales;f__Micrococcaceae;g__Rothia			0.0223077		0.02	0.08	0.02	0	0	0	0	0.24	0.04	0	0	0	0	0	0	0	0	0	0.04	0.04	0	0	0	0	0	0	0.02	0	0.02	0.02	0	0	0	0	0	0.04	0	0.16	0.02	0.02	0.02	0	0.02
OTU_586	OTU_586;D_0__Bacteria;D_1__Actinobacteria;D_2__Actinobacteria;D_3__Corynebacteriales;D_4__Corynebacteriaceae;D_5__Corynebacterium;D_6__Corynebacteriummatruchotii	k__Bacteria;p__Actinobacteria;c__Actinobacteria;o__Corynebacteriales;f__Corynebacteriaceae;g__Corynebacterium;s__matruchotii			0.00153846		0	0	0	0	0	0	0	0	0	0.02	0	0	0	0	0	0	0	0	0	0	0	0	0	0.02	0	0	0	0	0	0	0	0	0	0	0	0.04	0	0	0	0	0	0	0
OTU_588	OTU_588;D_0__Bacteria;D_1__Actinobacteria;D_2__Actinobacteria;D_3__Corynebacteriales;D_4__Corynebacteriaceae;D_5__Corynebacterium;D_6__Corynebacteriummatruchotii	k__Bacteria;p__Actinobacteria;c__Actinobacteria;o__Corynebacteriales;f__Corynebacteriaceae;g__Corynebacterium;s__matruchotii			0.00820513		0.02	0	0	0	0	0	0.02	0.02	0	0	0.02	0.02	0.02	0.02	0	0	0	0	0	0.02	0	0	0	0.02	0	0.02	0	0	0	0	0	0	0	0	0	0	0.04	0	0	0.02	0	0	0.04
OTU_589	OTU_589;D_0__Bacteria;D_1__Bacteroidetes;D_2__Bacteroidia;D_3__Bacteroidales;D_4__Prevotellaceae;D_5__Prevotella	k__Bacteria;p__Bacteroidetes;c__Bacteroidia;o__Bacteroidales;f__Prevotellaceae;g__Prevotella;s__salivae			0.00820513		0	0	0	0	0	0	0	0	0	0.02	0	0	0	0	0.26	0	0	0.02	0	0	0	0	0	0	0	0	0.04	0.02	0	0	0.02	0	0	0	0	0	0	0	0	0	0	0	0
OTU_59	OTU_59;D_0__Bacteria;D_1__Firmicutes;D_2__Negativicutes;D_3__Selenomonadales;D_4__Veillonellaceae;D_5__Selenomonas	k__Bacteria;p__Firmicutes;c__Negativicutes;o__Selenomonadales;f__Veillonellaceae;g__Veillonellaceae_[G-1];s__sp._oral_taxon_155			0.530256		0.12	0	0	0.38	0	0.14	0.56	0	0	1.02	0.02	0.06	0.18	0.12	0.18	1.42	0.06	1.7	0	0.08	0.06	0.02	1.54	0.02	0.04	0	0	0.88	1.4	0.2	0.12	0	0.2	0	0.76	0.08	3.68	0	0.56	0.84	0	0.1	0
OTU_591	OTU_591;D_0__Bacteria;D_1__Firmicutes;D_2__Negativicutes;D_3__Selenomonadales;D_4__Veillonellaceae;D_5__Veillonella;D_6__	k__Bacteria;p__Firmicutes;c__Negativicutes;o__Selenomonadales;f__Veillonellaceae;g__Veillonella			0.00128205		0	0	0	0	0	0.02	0	0	0	0.04	0	0	0	0	0	0	0	0	0	0	0	0	0	0	0	0	0	0	0	0	0	0	0	0	0	0	0	0	0	0	0	0.04	0
OTU_592	OTU_592;D_0__Bacteria;D_1__Bacteroidetes;D_2__Bacteroidia;D_3__Bacteroidales;D_4__Prevotellaceae;D_5__Alloprevotella;D_6__unculturedbacterium	k__Bacteria;p__Bacteroidetes;c__Bacteroidia;o__Bacteroidales;f__Prevotellaceae;g__Alloprevotella;s__tannerae			0.0710256		0.16	0	0	0.16	0	0.26	0.24	0	0	0	0.02	0.2	0	0	0	0.24	0	0.14	0	0	0.1	0	0	0	0.04	0	0	0.14	0.16	0	0.12	0.02	0.02	0	0	0	0	0	0	0.18	0	0	0
OTU_593	OTU_593;D_0__Bacteria;D_1__Actinobacteria;D_2__Actinobacteria;D_3__Actinomycetales;D_4__Actinomycetaceae;D_5__Actinomyces;D_6__	k__Bacteria;p__Actinobacteria;c__Actinobacteria;o__Actinomycetales;f__Actinomycetaceae;g__Actinomyces;s__dentalis			0.00025641		0	0	0	0	0	0	0	0	0	0	0	0	0	0	0	0	0	0	0	0	0	0	0	0	0	0	0	0	0	0	0	0	0	0	0	0	0	0	0	0	0	0	0
OTU_594	OTU_594;D_0__Bacteria;D_1__Actinobacteria;D_2__Actinobacteria;D_3__Corynebacteriales;D_4__Corynebacteriaceae;D_5__Corynebacterium;D_6__Corynebacteriummatruchotii	k__Bacteria;p__Actinobacteria;c__Actinobacteria;o__Corynebacteriales;f__Corynebacteriaceae;g__Corynebacterium;s__matruchotii			0.00025641		0	0	0	0	0	0	0	0	0	0	0	0	0	0	0	0	0	0	0	0	0	0	0	0	0	0	0	0	0	0	0	0	0	0	0	0	0	0	0	0	0	0	0
OTU_595	OTU_595;D_0__Bacteria;D_1__Bacteroidetes;D_2__Bacteroidia;D_3__Bacteroidales;D_4__Prevotellaceae;D_5__Prevotella	k__Bacteria;p__Bacteroidetes;c__Bacteroidia;o__Bacteroidales;f__Prevotellaceae;g__Prevotella			0.00205128		0	0	0	0	0	0	0	0	0	0	0	0	0	0	0	0	0	0.02	0	0	0	0	0.02	0	0	0	0	0.02	0	0	0	0	0	0	0	0	0	0	0	0	0	0	0
OTU_596	OTU_596;D_0__Bacteria;D_1__Proteobacteria;D_2__Alphaproteobacteria;D_3__Rhizobiales;D_4__Methylobacteriaceae;D_5__Methylobacterium;D_6__Methylobacteriumsp.PDD-23b-14	k__Bacteria;p__Proteobacteria;c__Alphaproteobacteria;o__Rhizobiales;f__Bradyrhizobiaceae;g__Bosea;s__vestrisii			0.000512821		0	0	0	0	0	0	0	0.02	0	0	0	0	0	0	0	0	0	0	0	0	0	0	0	0	0	0	0	0	0	0	0	0	0	0	0	0	0	0	0	0	0.02	0	0
OTU_6	OTU_6;D_0__Bacteria;D_1__Bacteroidetes;D_2__Bacteroidia;D_3__Bacteroidales;D_4__Porphyromonadaceae;D_5__Porphyromonas;D_6__	k__Bacteria;p__Bacteroidetes;c__Bacteroidia;o__Bacteroidales;f__Porphyromonadaceae;g__Porphyromonas;(s__endodontalis/s__sp._oral_taxon_285)			1.07		0	0	0	0	0	0.02	0.6	0.1	4.76	0	0	0.62	0	0.04	0	1.3	7.3	0.46	0.06	0.3	1.78	3.64	0	0.08	6.08	5.46	0.04	1.46	0.94	2.5	0.82	0	0	0.02	0	0	0	0	0	0	0	0.02	0
OTU_600	OTU_600;D_0__Bacteria;D_1__Fusobacteria;D_2__Fusobacteriia;D_3__Fusobacteriales;D_4__Leptotrichiaceae;D_5__Leptotrichia;D_6__unculturedbacterium	k__Bacteria;p__Fusobacteria;c__Fusobacteriia;o__Fusobacteriales;f__Leptotrichiaceae;g__Leptotrichia			0.00333333		0	0	0	0	0	0	0	0	0	0	0	0	0	0	0	0	0	0.06	0	0	0	0	0	0	0	0	0	0	0.06	0	0	0	0	0	0	0	0	0	0	0	0	0	0.02
OTU_603	OTU_603;D_0__Bacteria;D_1__Firmicutes;D_2__Negativicutes;D_3__Selenomonadales;D_4__Veillonellaceae;D_5__Selenomonas	k__Bacteria;p__Firmicutes;c__Negativicutes;o__Selenomonadales;f__Veillonellaceae;g__Selenomonas			0.00128205		0	0	0	0.02	0	0	0	0	0	0	0	0	0	0	0	0	0	0	0	0	0	0.02	0	0	0	0	0	0	0	0	0	0	0	0	0	0	0	0	0	0	0	0	0
OTU_604	OTU_604;D_0__Bacteria;D_1__Fusobacteria;D_2__Fusobacteriia;D_3__Fusobacteriales;D_4__Fusobacteriaceae;D_5__Fusobacterium;D_6__	k__Bacteria;p__Fusobacteria;c__Fusobacteriia;o__Fusobacteriales;f__Fusobacteriaceae;g__Fusobacterium			0.0333333		0.02	0	0	0	0	0.06	0	0	0.04	0.12	0.1	0.02	0.02	0	0	0	0.04	0.02	0.06	0.04	0.06	0	0.04	0.04	0.02	0.1	0	0.02	0.04	0.06	0	0.02	0.06	0.02	0	0.06	0.02	0.04	0	0.02	0	0.02	0.02
OTU_607	OTU_607;D_0__Bacteria;D_1__Fusobacteria;D_2__Fusobacteriia;D_3__Fusobacteriales;D_4__Leptotrichiaceae;D_5__Leptotrichia	k__Bacteria;p__Fusobacteria;c__Fusobacteriia;o__Fusobacteriales;f__Leptotrichiaceae;g__Leptotrichia;s__shahii			0.00538462		0	0	0	0.04	0	0.04	0.02	0	0	0	0	0	0	0	0	0	0	0.02	0	0	0	0	0	0	0	0	0	0	0	0	0	0	0.02	0	0	0	0	0	0	0	0	0	0
OTU_609	OTU_609;D_0__Bacteria;D_1__Proteobacteria;D_2__Gammaproteobacteria;D_3__Cardiobacteriales;D_4__Cardiobacteriaceae;D_5__Cardiobacterium	k__Bacteria;p__Proteobacteria;c__Gammaproteobacteria;o__Cardiobacteriales;f__Cardiobacteriaceae;g__Cardiobacterium;s__hominis			0.00128205		0	0	0.02	0	0	0	0	0	0	0	0	0	0	0	0	0	0	0	0	0	0	0	0	0.02	0	0	0	0	0	0	0	0	0	0	0	0	0.04	0	0	0	0	0	0
OTU_61	OTU_61;D_0__Bacteria;D_1__Bacteroidetes;D_2__Sphingobacteriia;D_3__Sphingobacteriales;D_4__WCHB1-69;D_5__Bacteroidalesgenomosp.P3oralcloneMB1_G34;D_6__Bacteroidalesgenomosp.P3oralcloneMB1_G34	k__Bacteria;p__Bacteroidetes;c__Bacteroidetes_[C-1];o__Bacteroidetes_[O-1];f__Bacteroidetes_[F-1];g__Bacteroidetes_[G-5];s__sp._oral_taxon_511			0.285897		0	0	0	0	0	0.04	0	0.04	0	0	0	0	0.8	0	0	0.2	0.3	0.04	0.04	0	0	4.82	0	0.24	0.12	0	0	0.36	0.7	1.54	0.28	0	0	0	0	0	0.42	0	0	0	0	0	0
OTU_612	OTU_612;D_0__Bacteria;D_1__Actinobacteria;D_2__Actinobacteria;D_3__Actinomycetales;D_4__Actinomycetaceae;D_5__Actinomyces	k__Bacteria;p__Actinobacteria;c__Actinobacteria;o__Actinomycetales;f__Actinomycetaceae;g__Actinomyces			0.00102564		0	0	0	0	0	0	0	0	0	0.02	0	0	0	0	0	0	0	0	0	0	0	0	0.02	0	0	0	0	0	0	0	0	0	0	0	0	0	0	0	0	0	0	0	0
OTU_613	OTU_613;D_0__Bacteria;D_1__Firmicutes;D_2__Clostridia;D_3__Clostridiales;D_4__Lachnospiraceae;D_5__Oribacterium	k__Bacteria;p__Firmicutes;c__Clostridia;o__Clostridiales;f__Lachnospiraceae_[XIV];g__Oribacterium;s__sp._oral_taxon_078			0.000769231		0	0	0	0	0	0	0	0	0	0	0	0	0	0	0	0	0	0	0	0	0	0	0	0	0	0	0	0	0	0	0	0	0	0	0	0	0	0	0	0.02	0	0	0
OTU_615	OTU_615;D_0__Bacteria;D_1__Actinobacteria;D_2__Actinobacteria;D_3__Actinomycetales;D_4__Actinomycetaceae;D_5__Actinomyces	k__Bacteria;p__Actinobacteria;c__Actinobacteria;o__Actinomycetales;f__Actinomycetaceae;g__Actinomyces;s__meyeri			0.00128205		0	0	0	0	0	0	0	0	0	0	0	0	0	0	0	0.02	0	0	0	0	0.02	0	0	0	0	0	0	0	0	0	0	0	0	0	0	0	0	0	0	0	0	0	0
OTU_616	OTU_616;D_0__Bacteria;D_1__Actinobacteria;D_2__Actinobacteria;D_3__Actinomycetales;D_4__Actinomycetaceae;D_5__Actinomyces	k__Bacteria;p__Actinobacteria;c__Actinobacteria;o__Actinomycetales;f__Actinomycetaceae;g__Actinomyces;s__meyeri			0.00102564		0	0	0	0	0	0	0	0	0	0	0	0	0	0	0	0	0	0	0	0.02	0	0.04	0	0	0	0	0	0	0	0	0	0	0	0	0	0	0	0	0	0	0	0	0
OTU_617	OTU_617;D_0__Bacteria;D_1__Actinobacteria;D_2__Actinobacteria;D_3__Actinomycetales;D_4__Actinomycetaceae;D_5__Actinomyces	k__Bacteria;p__Actinobacteria;c__Actinobacteria;o__Actinomycetales;f__Actinomycetaceae;g__Actinomyces;s__sp._oral_taxon_896			0.00025641		0	0	0	0	0	0	0	0	0	0	0	0	0	0	0	0	0	0	0	0	0	0	0	0.02	0	0	0	0	0	0	0	0	0	0	0	0	0	0	0	0	0	0	0
OTU_62	OTU_62;D_0__Bacteria;D_1__Actinobacteria;D_2__Actinobacteria;D_3__Bifidobacteriales;D_4__Bifidobacteriaceae	k__Bacteria;p__Actinobacteria;c__Actinobacteria;o__Bifidobacteriales;f__Bifidobacteriaceae;g__Scardovia;s__wiggsiae			0.246923		0	0	0	0	0.02	5.06	0.02	0.02	0	1.46	0	1.82	0.36	0	0	0	0	0.04	0	0.02	0	0	0.06	0	0.04	0	0	0.26	0.04	0.04	0.06	2.64	0	0	0	0	0	0	0.28	0	0.1	1.34	0
OTU_620	OTU_620;D_0__Bacteria;D_1__Proteobacteria;D_2__Betaproteobacteria;D_3__Neisseriales;D_4__Neisseriaceae	k__Bacteria;p__Proteobacteria;c__Betaproteobacteria;o__Neisseriales;f__Neisseriaceae			0.00025641		0	0	0	0	0	0	0	0	0	0	0	0	0	0	0	0	0	0	0	0	0	0	0	0	0	0	0	0	0	0	0	0	0	0	0	0	0	0	0	0	0	0	0
OTU_622	OTU_622;D_0__Bacteria;D_1__Fusobacteria;D_2__Fusobacteriia;D_3__Fusobacteriales;D_4__Fusobacteriaceae;D_5__Fusobacterium;D_6__	k__Bacteria;p__Fusobacteria;c__Fusobacteriia;o__Fusobacteriales;f__Fusobacteriaceae;g__Fusobacterium;s__nucleatum_subsp._animalis			0.00410256		0.08	0.02	0	0.02	0	0	0	0	0	0	0	0	0	0	0	0	0	0	0	0	0	0.02	0	0	0	0	0	0	0	0	0	0	0	0	0	0	0	0	0	0	0	0	0
OTU_623	OTU_623;D_0__Bacteria;D_1__Bacteroidetes;D_2__Flavobacteriia;D_3__Flavobacteriales;D_4__Flavobacteriaceae;D_5__Capnocytophaga;D_6__unculturedbacterium	k__Bacteria;p__Bacteroidetes;c__Flavobacteriia;o__Flavobacteriales;f__Flavobacteriaceae;g__Capnocytophaga			0.0679487		0.02	0	0.04	0.02	0	0.08	0.04	0	0.04	0	0.02	0.02	0.02	0.04	0	0	0	0.16	0.06	0.02	0	0	0	0.08	0	0.08	0.02	0.02	0.06	0.02	0.02	0.04	0.3	0.56	0.54	0.08	0.2	0	0.08	0.24	0	0	0.1
OTU_624	OTU_624;D_0__Bacteria;D_1__Fusobacteria;D_2__Fusobacteriia;D_3__Fusobacteriales;D_4__Leptotrichiaceae;D_5__Leptotrichia;D_6__unculturedbacterium	k__Bacteria;p__Fusobacteria;c__Fusobacteriia;o__Fusobacteriales;f__Leptotrichiaceae;g__Leptotrichia;s__sp._oral_taxon_392			0.0682051		0.02	0	0	0.04	0	0	0.1	0	0	0	0.12	0	0	0	0.2	0	0	1.14	0	0	0	0	0	0.12	0	0.12	0.06	0.02	1.9	0	0	0.04	0	0	0.06	0.12	0	0.02	0	0	0	0	0.12
OTU_625	OTU_625;D_0__Bacteria;D_1__Firmicutes;D_2__Clostridia;D_3__Clostridiales;D_4__Peptostreptococcaceae;D_5__Filifactor;D_6__	k__Bacteria;p__Firmicutes;c__Clostridia;o__Clostridiales;f__Peptostreptococcaceae_[XI];g__Filifactor;s__alocis			0.000769231		0	0	0	0	0	0	0	0	0	0	0	0	0	0	0	0	0	0	0	0	0	0	0	0	0	0	0	0	0	0	0	0	0	0	0	0	0	0	0	0	0	0	0
OTU_627	OTU_627;D_0__Bacteria;D_1__Firmicutes;D_2__Bacilli;D_3__Lactobacillales;D_4__Streptococcaceae;D_5__Streptococcus	k__Bacteria;p__Firmicutes;c__Bacilli;o__Lactobacillales;f__Streptococcaceae;g__Streptococcus			0.000769231		0	0	0	0	0	0	0	0	0	0	0	0	0	0	0	0	0	0	0	0	0	0	0	0	0	0	0	0	0	0	0	0	0	0	0	0	0	0	0	0	0	0	0
OTU_628	OTU_628;D_0__Bacteria;D_1__Firmicutes;D_2__Bacilli;D_3__Lactobacillales;D_4__Streptococcaceae;D_5__Streptococcus	k__Bacteria;p__Firmicutes;c__Bacilli;o__Lactobacillales;f__Streptococcaceae;g__Streptococcus			0.0276923		0	0.04	0.04	0	0	0.02	0.04	0.34	0.1	0.06	0	0	0	0	0.06	0.02	0.12	0	0.1	0.1	0	0	0	0	0	0.04	0.02	0	0	0	0	0.02	0	0.02	0.16	0.04	0	0.02	0	0	0.08	0	0.02
OTU_629	OTU_629;D_0__Bacteria;D_1__Firmicutes;D_2__Negativicutes;D_3__Selenomonadales;D_4__Veillonellaceae;D_5__Selenomonas;D_6__	k__Bacteria;p__Firmicutes;c__Negativicutes;o__Selenomonadales;f__Veillonellaceae			0.00102564		0	0	0	0	0	0	0	0	0	0	0	0	0	0	0	0	0	0	0	0	0	0	0	0.02	0	0	0	0	0	0	0	0	0	0	0	0	0	0	0	0	0	0	0
OTU_63	OTU_63;D_0__Bacteria;D_1__Firmicutes;D_2__Bacilli;D_3__Lactobacillales	k__Bacteria;p__Firmicutes;c__Bacilli;o__Lactobacillales;f__Carnobacteriaceae;g__Granulicatella;s__adiacens			0.12641		0.06	0.04	0.24	0	0	0.2	0.02	0.36	0.24	0.64	0	0.04	0.02	0.04	0.02	0.04	0.02	0.04	0.04	0.18	0.02	0	0	0	0	0.16	1.54	0.08	0.02	0.04	0	0.08	0.04	0.04	0.2	0.22	0	0.46	0.1	0	0.28	1.18	0.1
OTU_631	OTU_631;D_0__Bacteria;D_1__CandidatedivisionTM7	k__Bacteria;p__Saccharibacteria_(TM7);c__TM7_[C-1];o__TM7_[O-1];f__TM7_[F-1];g__TM7_[G-1]			0.00025641		0	0	0	0	0	0	0	0	0	0	0	0	0	0	0	0	0	0	0	0	0	0	0	0	0	0	0	0	0	0	0	0	0	0	0	0.02	0	0	0	0	0	0	0
OTU_632	OTU_632;D_0__Bacteria;D_1__Bacteroidetes;D_2__Bacteroidia;D_3__Bacteroidales;D_4__Prevotellaceae;D_5__Prevotella	k__Bacteria;p__Bacteroidetes;c__Bacteroidia;o__Bacteroidales;f__Prevotellaceae;g__Prevotella;s__denticola			0.000512821		0	0	0	0	0	0	0	0	0	0	0	0	0	0	0	0	0	0.02	0	0	0	0	0	0	0	0	0	0	0	0	0	0	0	0	0	0	0	0	0	0	0	0	0
OTU_64	OTU_64;D_0__Bacteria;D_1__Bacteroidetes;D_2__Flavobacteriia;D_3__Flavobacteriales;D_4__Flavobacteriaceae;D_5__Capnocytophaga;D_6__unculturedbacterium	k__Bacteria;p__Bacteroidetes;c__Flavobacteriia;o__Flavobacteriales;f__Flavobacteriaceae;g__Capnocytophaga;s__leadbetteri			1.28103		0.38	0.06	3.32	0.5	0	0.34	0.66	0.32	0.86	0.92	2.14	0.28	0.56	1.44	1.02	1.12	0.18	2.84	2.08	0.24	0.02	0.04	0.92	1.5	0.04	2.76	4.36	0.66	1.86	1.22	0.62	0.68	3.46	0.06	0.34	4.48	2.94	2	1.92	1.16	0.08	0.2	1.88
OTU_642	OTU_642;D_0__Bacteria;D_1__Bacteroidetes;D_2__Flavobacteriia;D_3__Flavobacteriales;D_4__Flavobacteriaceae;D_5__Capnocytophaga	k__Bacteria;p__Bacteroidetes;c__Flavobacteriia;o__Flavobacteriales;f__Flavobacteriaceae;g__Capnocytophaga			0.000512821		0	0	0	0	0	0	0	0	0	0	0	0	0	0	0	0	0	0	0	0	0	0	0	0	0	0	0	0	0	0	0	0	0	0	0	0	0	0	0	0	0	0	0.04
OTU_643	OTU_643;D_0__Bacteria;D_1__CandidatedivisionSR1	k__Bacteria;p__SR1;c__SR1_[C-1];o__SR1_[O-1];f__SR1_[F-1];g__SR1_[G-1];s__sp._oral_taxon_874			0.00435897		0	0	0	0	0	0	0	0.02	0.02	0	0	0	0	0.14	0	0.02	0	0	0	0	0	0	0	0	0	0	0	0	0	0	0	0	0	0	0	0	0	0.04	0	0	0	0	0.02
OTU_646	OTU_646;D_0__Bacteria;D_1__Bacteroidetes;D_2__Flavobacteriia;D_3__Flavobacteriales;D_4__Flavobacteriaceae;D_5__Capnocytophaga	k__Bacteria;p__Bacteroidetes;c__Flavobacteriia;o__Flavobacteriales;f__Flavobacteriaceae;g__Capnocytophaga;s__sp._oral_taxon_332			0.00179487		0	0	0	0	0	0	0	0	0	0	0	0	0	0	0	0	0	0.04	0	0	0	0	0	0	0	0	0	0	0	0	0	0	0	0	0	0	0	0	0	0	0	0	0.02
OTU_647	OTU_647;D_0__Bacteria;D_1__Actinobacteria;D_2__Actinobacteria;D_3__Corynebacteriales;D_4__Corynebacteriaceae;D_5__Corynebacterium;D_6__Corynebacteriummatruchotii	k__Bacteria;p__Actinobacteria;c__Actinobacteria;o__Corynebacteriales;f__Corynebacteriaceae;g__Corynebacterium;s__matruchotii			0.00025641		0	0	0	0	0	0	0	0	0.02	0	0	0	0	0	0	0	0	0	0	0	0	0	0	0	0	0	0	0	0	0	0	0	0	0	0	0	0	0	0	0	0	0	0
OTU_648	OTU_648;D_0__Bacteria;D_1__Firmicutes;D_2__Bacilli;D_3__Lactobacillales;D_4__Streptococcaceae;D_5__Streptococcus;D_6__unculturedStreptococcaceaebacterium	k__Bacteria;p__Firmicutes;c__Bacilli;o__Lactobacillales;f__Streptococcaceae;g__Streptococcus			0.00025641		0	0	0	0	0	0	0	0	0	0	0	0	0	0	0	0	0	0	0	0	0	0	0	0	0	0	0	0	0	0	0	0	0	0	0	0	0	0	0	0	0.02	0	0
OTU_649	OTU_649;D_0__Bacteria;D_1__Actinobacteria;D_2__Actinobacteria;D_3__Actinomycetales;D_4__Actinomycetaceae;D_5__Actinomyces	k__Bacteria;p__Actinobacteria;c__Actinobacteria;o__Actinomycetales;f__Actinomycetaceae;g__Actinomyces;s__gerencseriae			0.00102564		0	0	0	0	0	0	0	0	0	0	0	0	0	0	0	0	0	0.02	0	0	0	0	0.02	0	0	0	0	0	0	0	0.02	0	0	0	0	0	0	0	0	0	0	0	0
OTU_651	OTU_651;D_0__Bacteria;D_1__Bacteroidetes;D_2__Bacteroidia;D_3__Bacteroidales;D_4__Prevotellaceae;D_5__Prevotella	k__Bacteria;p__Bacteroidetes;c__Bacteroidia;o__Bacteroidales;f__Prevotellaceae;g__Prevotella			0.00282051		0	0	0	0.06	0	0.02	0	0	0	0	0	0	0	0.04	0	0	0	0	0	0.02	0	0	0	0	0	0	0	0	0	0	0.02	0	0	0	0	0	0	0	0.02	0	0	0	0
OTU_654	OTU_654;D_0__Bacteria;D_1__Bacteroidetes;D_2__Bacteroidia;D_3__Bacteroidales;D_4__Prevotellaceae;D_5__Prevotella;D_6__Prevotellasp.oralcloneAH125	k__Bacteria;p__Bacteroidetes;c__Bacteroidia;o__Bacteroidales;f__Prevotellaceae;g__Prevotella;s__sp._oral_taxon_300			0.0505128		0	0	0	0.02	0	0.14	0.12	0	0.02	0	0.02	0.08	0	0.02	0	0.16	0	0.22	0	0	0.08	0	0.26	0	0	0	0	0.16	0.02	0.06	0.04	0.12	0	0	0	0	0.02	0	0.04	0	0	0.02	0
OTU_655	OTU_655;D_0__Bacteria;D_1__Firmicutes;D_2__Bacilli;D_3__Bacillales;D_4__FamilyXI;D_5__Gemella;D_6__Gemellasp.oralstrainA31SC	k__Bacteria;p__Firmicutes;c__Bacilli;o__Bacillales;f__Gemellaceae;g__Gemella			0.00384615		0	0	0	0	0	0.06	0	0	0	0	0	0	0	0	0	0	0	0	0	0	0	0	0	0	0	0	0	0	0	0	0	0	0	0	0	0	0	0	0	0	0	0	0
OTU_657	OTU_657;D_0__Bacteria;D_1__Bacteroidetes;D_2__Bacteroidia;D_3__Bacteroidales;D_4__Prevotellaceae;D_5__Prevotella	k__Bacteria;p__Bacteroidetes;c__Bacteroidia;o__Bacteroidales;f__Prevotellaceae;g__Prevotella;s__oris			0.0184615		0	0	0	0.02	0.08	0.08	0.02	0	0	0	0	0.04	0	0.12	0.04	0	0	0	0.02	0.08	0.02	0	0	0	0	0	0	0.02	0.02	0	0.04	0.08	0.04	0	0	0	0	0.02	0	0	0.06	0.28	0.02
OTU_659	OTU_659;D_0__Bacteria;D_1__Firmicutes;D_2__Negativicutes;D_3__Selenomonadales;D_4__Veillonellaceae	k__Bacteria;p__Firmicutes;c__Negativicutes;o__Selenomonadales;f__Veillonellaceae			0.00025641		0	0	0	0	0	0	0	0	0	0	0	0	0.02	0	0	0	0	0	0	0	0	0	0	0	0	0	0	0	0	0	0	0	0	0	0	0	0	0	0	0	0	0	0
OTU_66	OTU_66;D_0__Bacteria;D_1__Bacteroidetes;D_2__Bacteroidia;D_3__Bacteroidales;D_4__Prevotellaceae;D_5__Prevotella;D_6__	k__Bacteria;p__Bacteroidetes;c__Bacteroidia;o__Bacteroidales;f__Prevotellaceae;g__Prevotella;s__dentalis			0.125385		0	0	0	0	0	0	0	0.08	0.06	0	0.04	0	0	0	0	0.22	0.04	0	0	0	0.3	0.9	0.72	0.1	2.24	0	0	0	0.02	0	0	0	0	0	0	0	0	0	0	1.96	0	0	0
OTU_661	OTU_661;D_0__Bacteria;D_1__CandidatedivisionTM7;D_2__unculturedbacterium;D_3__unculturedbacterium;D_4__unculturedbacterium;D_5__unculturedbacterium;D_6__unculturedbacterium	k__Bacteria;p__Saccharibacteria_(TM7);c__TM7_[C-1];o__TM7_[O-1];f__TM7_[F-1];g__TM7_[G-6];s__sp._oral_taxon_870			0.000769231		0	0	0	0	0	0	0	0	0	0	0	0	0	0	0	0	0	0	0	0	0	0	0	0	0	0	0	0	0.02	0	0	0	0	0	0	0	0	0	0	0	0	0	0
OTU_662	OTU_662;D_0__Bacteria;D_1__Actinobacteria;D_2__Actinobacteria;D_3__Corynebacteriales;D_4__Corynebacteriaceae;D_5__Corynebacterium;D_6__Corynebacteriumsp.canineoraltaxon422	k__Bacteria;p__Actinobacteria;c__Actinobacteria;o__Corynebacteriales;f__Corynebacteriaceae;g__Corynebacterium;s__durum			0.000512821		0	0	0	0	0	0	0	0	0	0	0	0	0	0	0	0	0	0	0	0	0	0	0	0	0	0	0	0	0	0	0	0	0	0	0	0	0	0	0	0	0	0	0
OTU_663	OTU_663;D_0__Bacteria;D_1__Firmicutes;D_2__Negativicutes;D_3__Selenomonadales;D_4__Veillonellaceae;D_5__Selenomonas	k__Bacteria;p__Firmicutes;c__Negativicutes;o__Selenomonadales;f__Veillonellaceae			0.00512821		0	0	0	0.02	0	0	0	0	0	0	0	0.02	0	0.02	0	0	0.02	0.06	0	0	0.02	0	0	0	0	0	0	0	0	0	0	0	0	0	0	0.02	0	0	0.02	0	0	0	0
OTU_664	OTU_664;D_0__Bacteria;D_1__Bacteroidetes;D_2__Bacteroidia;D_3__Bacteroidales;D_4__Prevotellaceae;D_5__Prevotella	k__Bacteria;p__Bacteroidetes;c__Bacteroidia;o__Bacteroidales;f__Prevotellaceae;g__Prevotella;s__oris			0.00153846		0	0	0	0	0	0	0	0	0	0	0	0	0	0	0	0.04	0	0	0	0	0	0	0	0	0	0	0	0	0	0	0	0	0	0	0	0	0	0	0	0	0	0	0
OTU_665	OTU_665;D_0__Bacteria;D_1__Proteobacteria;D_2__Betaproteobacteria;D_3__Neisseriales;D_4__Neisseriaceae	k__Bacteria;p__Proteobacteria;c__Betaproteobacteria;o__Neisseriales;f__Neisseriaceae;g__Neisseria			0.000769231		0	0	0	0	0	0.04	0	0	0	0	0	0	0	0	0	0	0	0	0	0	0	0	0	0	0	0	0	0	0	0	0	0	0	0	0	0	0	0	0	0	0	0	0
OTU_666	OTU_666;D_0__Bacteria;D_1__Firmicutes;D_2__Bacilli;D_3__Lactobacillales;D_4__Streptococcaceae;D_5__Streptococcus;D_6__Streptococcussp.XJ-RY-3	k__Bacteria;p__Firmicutes;c__Bacilli;o__Lactobacillales;f__Streptococcaceae;g__Streptococcus			0.00128205		0	0	0	0	0	0	0	0	0	0	0	0	0	0	0	0	0	0	0	0	0	0	0	0	0	0	0	0	0	0	0	0	0	0	0	0	0	0	0	0	0	0	0
OTU_667	OTU_667;D_0__Bacteria;D_1__Firmicutes;D_2__Negativicutes;D_3__Selenomonadales;D_4__Veillonellaceae;D_5__Selenomonas	k__Bacteria;p__Firmicutes;c__Negativicutes;o__Selenomonadales;f__Veillonellaceae;g__Selenomonas;s__sp._oral_taxon_134			0.00205128		0	0	0	0	0	0	0	0	0	0	0	0	0	0	0	0	0.02	0	0	0	0	0	0.04	0	0.02	0	0	0	0	0.02	0	0	0	0	0	0	0.02	0	0	0	0	0	0
OTU_668	OTU_668;D_0__Bacteria;D_1__Bacteroidetes;D_2__Bacteroidia;D_3__Bacteroidales;D_4__Prevotellaceae;D_5__Prevotella	k__Bacteria;p__Bacteroidetes;c__Bacteroidia;o__Bacteroidales;f__Prevotellaceae;g__Prevotella;s__sp._oral_taxon_301			0.0282051		0.06	0	0	0.04	0	0.06	0	0	0.04	0	0.14	0.02	0	0.1	0	0	0	0.04	0	0	0.04	0.16	0.04	0.06	0	0	0	0.04	0.04	0.02	0	0	0	0	0.12	0.04	0.02	0	0	0	0	0	0
OTU_669	OTU_669;D_0__Bacteria;D_1__Bacteroidetes;D_2__Flavobacteriia;D_3__Flavobacteriales;D_4__Flavobacteriaceae;D_5__Capnocytophaga;D_6__unculturedbacterium	k__Bacteria;p__Bacteroidetes;c__Flavobacteriia;o__Flavobacteriales;f__Flavobacteriaceae;g__Capnocytophaga;s__sputigena			0.0776923		0.32	0	0	0	3.3	0	0	0.02	0	0	0	0	0	0	0	0	0.04	0.24	0.44	0	0	0	0	0	0	0	0.02	0	0	0	0	0	0	0	0	0	0	0	0	0	0	0.72	0
OTU_67	OTU_67;D_0__Bacteria;D_1__Firmicutes;D_2__Clostridia;D_3__Clostridiales;D_4__Lachnospiraceae;D_5__Oribacterium;D_6__	k__Bacteria;p__Firmicutes;c__Clostridia;o__Clostridiales;f__Lachnospiraceae_[XIV];g__Oribacterium;s__sp._oral_taxon_078			0.146154		0.06	0	0	0.12	0	0.36	0.16	0	0.04	0	0.08	0	0.12	0.44	1.92	0.06	0.06	0.08	0	0.02	0.22	0	0.78	0.02	0.06	0.02	0.04	0.24	0.2	0.02	0.38	0.44	0.04	0.2	0.58	0.02	0.1	0	0.42	0.22	0.04	0.04	0
OTU_670	OTU_670;D_0__Bacteria;D_1__Bacteroidetes;D_2__Bacteroidia;D_3__Bacteroidales;D_4__Prevotellaceae;D_5__Prevotella	k__Bacteria;p__Bacteroidetes;c__Bacteroidia;o__Bacteroidales;f__Prevotellaceae;g__Prevotella;s__oris			0.00282051		0	0	0	0.02	0	0	0	0	0	0	0	0	0	0.02	0	0.02	0	0	0	0	0	0	0	0	0.02	0	0	0	0	0	0.02	0	0	0	0	0	0	0	0	0	0	0	0
OTU_671	OTU_671;D_0__Bacteria;D_1__Bacteroidetes;D_2__Bacteroidia;D_3__Bacteroidales;D_4__Prevotellaceae;D_5__Prevotella	k__Bacteria;p__Bacteroidetes;c__Bacteroidia;o__Bacteroidales;f__Prevotellaceae;g__Prevotella;s__salivae			0.00128205		0	0	0	0	0	0	0	0	0	0	0	0	0	0	0.06	0	0	0	0	0	0	0	0.04	0	0	0	0	0	0	0	0	0	0	0	0	0	0	0	0	0	0	0	0
OTU_672	OTU_672;D_0__Bacteria;D_1__Actinobacteria;D_2__Actinobacteria;D_3__Micrococcales;D_4__Micrococcaceae;D_5__Rothia;D_6__unculturedbacterium	k__Bacteria;p__Actinobacteria;c__Actinobacteria;o__Actinomycetales;f__Micrococcaceae;g__Rothia;s__dentocariosa			0.0194872		0	0	0.02	0	0.1	0	0	0.08	0.1	0	0	0	0	0.02	0	0	0	0	0.34	0	0	0	0	0	0	0	0	0	0	0	0.02	0	0	0.28	0.02	0.02	0	0.02	0	0.02	0	0	0
OTU_673	OTU_673;D_0__Bacteria;D_1__Firmicutes;D_2__Negativicutes;D_3__Selenomonadales;D_4__Veillonellaceae	k__Bacteria;p__Firmicutes;c__Negativicutes;o__Selenomonadales;f__Veillonellaceae;g__Selenomonas			0.00153846		0	0	0	0	0	0	0	0	0	0	0	0.02	0	0	0	0.02	0	0	0	0	0	0	0	0	0.02	0	0	0	0	0	0	0	0	0	0	0	0	0	0	0	0	0	0
OTU_674	OTU_674;D_0__Bacteria;D_1__Spirochaetae;D_2__Spirochaetes;D_3__Spirochaetales;D_4__Spirochaetaceae;D_5__Treponema;D_6__Treponemasp.I:Q:AT20	k__Bacteria;p__Spirochaetes;c__Spirochaetia;o__Spirochaetales;f__Spirochaetaceae;g__Treponema;s__sp._oral_taxon_238			0.00128205		0	0	0	0	0	0	0	0	0	0	0	0	0	0	0	0	0	0	0	0.02	0	0	0	0	0	0	0	0	0	0	0	0	0	0	0	0	0	0	0	0	0	0	0
OTU_676	OTU_676;D_0__Bacteria;D_1__Fusobacteria;D_2__Fusobacteriia;D_3__Fusobacteriales;D_4__Leptotrichiaceae;D_5__Leptotrichia;D_6__unculturedbacterium	k__Bacteria;p__Fusobacteria;c__Fusobacteriia;o__Fusobacteriales;f__Leptotrichiaceae;g__Leptotrichia			0.0161538		0	0	0.14	0.02	0	0.04	0.02	0	0	0.06	0	0	0	0	0.04	0	0	0.02	0	0	0	0	0	0.04	0	0	0	0	0	0	0	0	0.18	0	0	0.02	0	0	0	0	0	0	0
OTU_68	OTU_68;D_0__Bacteria;D_1__Proteobacteria;D_2__Betaproteobacteria;D_3__Neisseriales;D_4__Neisseriaceae	k__Bacteria;p__Proteobacteria;c__Betaproteobacteria;o__Neisseriales;f__Neisseriaceae			0.660256		0.28	0.46	1.48	0.56	0.84	0.26	0.34	0.24	0.4	0.44	0.42	0.14	3.1	0.42	0.12	0.26	0.32	0.94	0.18	1.54	1.06	0.18	0.16	0.12	0	0.8	2.96	0.04	0.34	0	0.26	0	0.3	0.82	0.62	4.62	0.38	7.46	0.78	0.32	0.06	0	1.36
OTU_682	OTU_682;D_0__Bacteria;D_1__Bacteroidetes;D_2__Bacteroidia;D_3__Bacteroidales;D_4__Prevotellaceae;D_5__Prevotella	k__Bacteria;p__Bacteroidetes;c__Bacteroidia;o__Bacteroidales;f__Prevotellaceae;g__Prevotella			0.00282051		0	0	0	0	0	0	0	0	0	0	0	0	0	0	0.02	0	0.02	0	0	0	0	0	0	0	0	0	0	0.12	0	0	0	0	0	0	0	0	0	0	0	0.02	0	0	0
OTU_685	OTU_685;D_0__Bacteria;D_1__Bacteroidetes;D_2__Bacteroidia;D_3__Bacteroidales;D_4__Porphyromonadaceae;D_5__Tannerella;D_6__Tannerellaforsythia	k__Bacteria;p__Bacteroidetes;c__Bacteroidia;o__Bacteroidales;f__Porphyromonadaceae;g__Tannerella;s__forsythia			0.000769231		0	0	0	0	0	0	0	0	0	0	0	0	0	0	0	0	0	0.02	0	0	0	0	0	0	0	0	0	0	0	0	0	0	0	0.02	0	0	0	0	0	0	0	0	0
OTU_686	OTU_686;D_0__Bacteria;D_1__Fusobacteria;D_2__Fusobacteriia;D_3__Fusobacteriales;D_4__Fusobacteriaceae;D_5__Fusobacterium;D_6__	k__Bacteria			0.00025641		0	0	0	0	0	0	0	0	0	0	0	0	0	0	0	0	0	0	0	0	0	0	0	0.02	0	0	0	0	0	0	0	0	0	0	0	0	0	0	0	0	0	0	0
OTU_687	OTU_687;D_0__Bacteria;D_1__Firmicutes;D_2__Negativicutes;D_3__Selenomonadales;D_4__Veillonellaceae;D_5__Selenomonas	k__Bacteria;p__Firmicutes;c__Negativicutes;o__Selenomonadales;f__Veillonellaceae;g__Selenomonas			0.00948718		0	0	0.02	0	0	0	0.02	0	0.04	0.02	0	0	0	0	0	0	0	0	0	0	0	0	0.04	0.06	0	0	0	0	0	0	0	0	0.08	0	0	0.02	0.02	0	0	0	0	0	0
OTU_688	OTU_688;D_0__Bacteria;D_1__Fusobacteria;D_2__Fusobacteriia;D_3__Fusobacteriales;D_4__Leptotrichiaceae;D_5__Leptotrichia	k__Bacteria;p__Fusobacteria;c__Fusobacteriia;o__Fusobacteriales;f__Leptotrichiaceae;g__Leptotrichia			0.00230769		0	0	0	0	0	0	0	0	0	0	0.02	0	0	0	0	0	0	0	0	0	0	0	0	0	0	0	0	0	0	0	0	0	0.02	0	0	0	0	0	0	0	0	0	0
OTU_69	OTU_69;D_0__Bacteria;D_1__Fusobacteria;D_2__Fusobacteriia;D_3__Fusobacteriales;D_4__Leptotrichiaceae;D_5__Leptotrichia	k__Bacteria;p__Fusobacteria;c__Fusobacteriia;o__Fusobacteriales;f__Leptotrichiaceae;g__Leptotrichia;s__sp._oral_taxon_215			0.228205		0.12	13.58	0.12	0.04	0	0	0.06	0	0	0	0.22	0	0	0	0.02	0	0	0.16	0.12	0	0	0	0	0	0	0.22	0.66	0.04	0.12	0	0	0.02	0.06	0	0	0.02	0	0.16	0	0.02	0	0	0
OTU_690	OTU_690;D_0__Bacteria;D_1__Proteobacteria;D_2__Betaproteobacteria;D_3__Neisseriales;D_4__Neisseriaceae;D_5__Kingella;D_6__unculturedbacterium	k__Bacteria;p__Proteobacteria;c__Betaproteobacteria;o__Neisseriales;f__Neisseriaceae;g__Kingella;s__oralis			0.0105128		0	0	0	0	0.1	0	0.04	0.02	0	0	0	0.08	0	0	0	0	0.08	0	0.08	0	0	0	0	0	0	0	0	0	0	0	0	0	0.02	0.06	0	0	0	0	0	0.02	0.1	0	0.06
OTU_691	OTU_691;D_0__Bacteria;D_1__Firmicutes;D_2__Negativicutes;D_3__Selenomonadales;D_4__Veillonellaceae	k__Bacteria;p__Firmicutes;c__Negativicutes;o__Selenomonadales;f__Veillonellaceae			0.00512821		0	0	0	0	0	0	0	0	0	0	0	0	0	0.02	0.1	0	0	0	0	0	0	0	0	0	0	0	0	0	0	0	0	0	0	0	0	0	0	0	0.08	0	0	0	0
OTU_692	OTU_692;D_0__Bacteria;D_1__Firmicutes;D_2__Negativicutes;D_3__Selenomonadales;D_4__Veillonellaceae	k__Bacteria;p__Firmicutes;c__Negativicutes;o__Selenomonadales;f__Veillonellaceae			0.00025641		0	0	0	0	0	0	0	0	0	0	0	0	0	0	0.02	0	0	0	0	0	0	0	0	0	0	0	0	0	0	0	0	0	0	0	0	0	0	0	0	0	0	0	0
OTU_693	OTU_693;D_0__Bacteria;D_1__Actinobacteria;D_2__Actinobacteria;D_3__Actinomycetales;D_4__Actinomycetaceae;D_5__Actinomyces	k__Bacteria;p__Actinobacteria;c__Actinobacteria;o__Actinomycetales;f__Actinomycetaceae;g__Actinomyces;s__massiliensis			0.0074359		0	0	0	0	0	0	0	0.02	0.04	0	0	0	0	0	0	0	0	0	0.04	0	0	0	0	0	0	0.02	0	0.02	0	0.02	0	0.02	0	0	0.02	0	0.02	0.04	0.02	0.02	0.04	0.02	0.02
OTU_694	OTU_694;D_0__Bacteria;D_1__Bacteroidetes;D_2__Bacteroidia;D_3__Bacteroidales;D_4__Prevotellaceae;D_5__Prevotella;D_6__unculturedPrevotellasp.	k__Bacteria;p__Bacteroidetes;c__Bacteroidia;o__Bacteroidales;f__Prevotellaceae;g__Prevotella;s__oris			0.00307692		0	0	0	0.06	0	0.02	0	0	0	0	0	0.02	0	0.02	0	0.02	0	0	0	0	0	0	0.02	0	0	0	0	0.02	0	0	0	0	0.04	0	0	0	0	0	0	0	0	0	0
OTU_696	OTU_696;D_0__Bacteria;D_1__Firmicutes;D_2__Negativicutes;D_3__Selenomonadales;D_4__Veillonellaceae;D_5__Veillonella;D_6__unculturedbacterium	k__Bacteria;p__Firmicutes;c__Negativicutes;o__Selenomonadales;f__Veillonellaceae;g__Veillonella;s__parvula			0.0382051		0.06	0.02	0.12	0.04	0	0.08	0	0	0	0.06	0	0.28	0	0.02	0.2	0	0.04	0.02	0	0	0.02	0	0.12	0.16	0	0.18	0.06	0	0	0.16	0	0.04	0.04	0	0.02	0.04	0	0.06	0	0.02	0	0.08	0
OTU_698	OTU_698;D_0__Bacteria;D_1__Firmicutes;D_2__Negativicutes;D_3__Selenomonadales;D_4__Veillonellaceae;D_5__Veillonella;D_6__	k__Bacteria;p__Firmicutes;c__Negativicutes;o__Selenomonadales;f__Veillonellaceae;g__Veillonella			0.00179487		0	0	0.02	0	0	0	0	0	0	0	0	0	0	0	0	0	0	0	0	0	0	0	0	0	0	0.02	0	0	0	0	0	0	0	0	0	0.02	0	0	0	0	0.04	0.04	0
OTU_699	OTU_699;D_0__Bacteria;D_1__Actinobacteria;D_2__Actinobacteria;D_3__Corynebacteriales;D_4__Corynebacteriaceae;D_5__Corynebacterium;D_6__Corynebacteriummatruchotii	k__Bacteria;p__Actinobacteria;c__Actinobacteria;o__Corynebacteriales;f__Corynebacteriaceae;g__Corynebacterium;s__matruchotii			0.000769231		0	0	0	0	0	0	0	0	0	0	0	0	0.02	0	0	0	0	0	0	0	0	0	0	0.02	0	0	0	0	0	0	0	0	0	0	0	0	0	0	0	0	0	0	0
OTU_70	OTU_70;D_0__Bacteria;D_1__Bacteroidetes;D_2__Bacteroidia;D_3__Bacteroidales;D_4__Prevotellaceae;D_5__Prevotella;D_6__PrevotellaoralisHGA0225	k__Bacteria;p__Bacteroidetes;c__Bacteroidia;o__Bacteroidales;f__Prevotellaceae;g__Prevotella;s__oralis			0.160256		0.3	0	0.04	0	0	0.8	0.18	0	0.08	0	0	0.08	0	0.04	0	0.7	0.04	0	0	0.02	0.02	0.02	0.74	0	0.24	0	0	0	0.52	0.1	1.48	0	0	0	0.96	0	0	0	0	0.14	0	0	0
OTU_701	OTU_701;D_0__Bacteria;D_1__Fusobacteria;D_2__Fusobacteriia;D_3__Fusobacteriales;D_4__Leptotrichiaceae;D_5__Leptotrichia;D_6__unculturedbacterium	k__Bacteria;p__Fusobacteria;c__Fusobacteriia;o__Fusobacteriales;f__Leptotrichiaceae;g__Leptotrichia			0.00205128		0	0	0	0.02	0	0	0	0	0	0	0	0	0	0	0	0	0	0.06	0	0	0	0	0	0	0	0	0	0	0	0	0	0	0	0	0	0.02	0	0	0	0	0	0	0
OTU_703	OTU_703;D_0__Bacteria;D_1__Firmicutes;D_2__Negativicutes;D_3__Selenomonadales;D_4__Veillonellaceae;D_5__Veillonella	k__Bacteria;p__Firmicutes;c__Negativicutes;o__Selenomonadales;f__Veillonellaceae;g__Veillonella			0.00128205		0.04	0	0	0	0	0.02	0	0	0	0	0	0	0	0	0	0	0	0	0	0	0	0	0	0	0	0.02	0	0	0	0	0	0	0	0	0	0	0	0	0	0	0	0	0
OTU_706	OTU_706;D_0__Bacteria;D_1__CandidatedivisionTM7	k__Bacteria;p__Saccharibacteria_(TM7);c__TM7_[C-1];o__TM7_[O-1];f__TM7_[F-1];g__TM7_[G-1]			0.00205128		0	0.04	0	0	0	0	0	0	0	0	0	0	0	0	0	0	0	0.02	0	0	0	0	0	0.04	0	0	0	0	0	0	0	0	0	0	0	0	0.02	0	0	0	0	0	0
OTU_707	OTU_707;D_0__Bacteria;D_1__Actinobacteria;D_2__Actinobacteria;D_3__Corynebacteriales;D_4__Corynebacteriaceae;D_5__Corynebacterium;D_6__Corynebacteriummatruchotii	k__Bacteria;p__Actinobacteria;c__Actinobacteria;o__Corynebacteriales;f__Corynebacteriaceae;g__Corynebacterium;s__matruchotii			0.00230769		0	0	0	0	0	0	0	0	0	0	0.02	0	0	0	0	0	0	0	0	0	0	0	0	0.04	0	0	0	0	0	0	0	0	0	0	0.02	0	0.02	0	0	0	0	0	0
OTU_708	OTU_708;D_0__Bacteria;D_1__Bacteroidetes;D_2__Bacteroidia;D_3__Bacteroidales;D_4__Prevotellaceae;D_5__Prevotella	k__Bacteria;p__Bacteroidetes;c__Bacteroidia;o__Bacteroidales;f__Prevotellaceae;g__Prevotella;s__oris			0.00230769		0	0	0	0	0.02	0	0	0	0	0	0	0	0	0.04	0	0	0	0	0	0	0	0	0	0	0	0	0	0	0	0	0	0	0	0	0	0	0	0.04	0.04	0	0	0	0
OTU_709	OTU_709;D_0__Bacteria;D_1__Bacteroidetes;D_2__Bacteroidia;D_3__Bacteroidales;D_4__Prevotellaceae;D_5__Prevotella	k__Bacteria;p__Bacteroidetes;c__Bacteroidia;o__Bacteroidales;f__Prevotellaceae;g__Prevotella			0.00102564		0	0	0	0	0	0	0	0	0	0	0	0	0	0	0	0.04	0	0	0	0	0	0	0	0	0	0	0	0	0	0	0	0	0	0	0	0	0	0	0	0	0	0	0
OTU_71	OTU_71;D_0__Bacteria;D_1__Firmicutes;D_2__Negativicutes;D_3__Selenomonadales;D_4__Veillonellaceae;D_5__Anaeroglobus;D_6__unculturedbacterium	k__Bacteria;p__Firmicutes;c__Negativicutes;o__Selenomonadales;f__Veillonellaceae;g__Anaeroglobus;s__geminatus			0.380256		0	0.02	0	0	0	1.46	0.08	0.02	0.02	0.08	0	0	0.32	0.2	0	0.62	0.02	0.66	0.02	0.02	0.14	1.16	1.16	0	0.32	0	0	2.54	0	0.26	1.22	0	0.32	0	0.14	0.02	0.14	0	0.2	0.28	0	0	0
OTU_710	OTU_710;D_0__Bacteria;D_1__Bacteroidetes;D_2__Flavobacteriia;D_3__Flavobacteriales;D_4__Flavobacteriaceae;D_5__Capnocytophaga;D_6__unculturedbacterium	k__Bacteria;p__Bacteroidetes;c__Flavobacteriia;o__Flavobacteriales;f__Flavobacteriaceae;g__Capnocytophaga			0.00846154		0	0	0	0.02	0	0	0.02	0	0.04	0	0	0	0	0	0	0	0	0.08	0	0	0	0	0	0	0	0	0.02	0	0.04	0	0	0.02	0	0	0	0.12	0	0	0.08	0	0	0	0
OTU_711	OTU_711;D_0__Bacteria;D_1__Actinobacteria;D_2__Actinobacteria;D_3__Actinomycetales;D_4__Actinomycetaceae;D_5__Actinomyces	k__Bacteria;p__Actinobacteria;c__Actinobacteria;o__Actinomycetales;f__Actinomycetaceae;g__Actinomyces;s__massiliensis			0.00153846		0	0	0	0	0	0	0	0	0	0	0	0	0	0	0	0	0	0	0	0	0	0	0	0	0	0	0	0	0.02	0	0	0	0	0	0	0	0	0	0	0.02	0	0	0.02
OTU_712	OTU_712;D_0__Bacteria;D_1__Proteobacteria;D_2__Betaproteobacteria;D_3__Neisseriales;D_4__Neisseriaceae;D_5__Neisseria	k__Bacteria;p__Proteobacteria;c__Betaproteobacteria;o__Neisseriales;f__Neisseriaceae;g__Neisseria;s__oralis			0.00205128		0	0.12	0	0	0	0	0	0	0	0	0	0	0	0	0	0	0	0	0	0	0	0	0	0	0	0	0.02	0	0	0	0	0	0	0	0	0	0	0	0	0	0	0	0
OTU_713	OTU_713;D_0__Bacteria;D_1__Firmicutes;D_2__Negativicutes;D_3__Selenomonadales;D_4__Veillonellaceae;D_5__Selenomonas	k__Bacteria;p__Firmicutes;c__Negativicutes;o__Selenomonadales;f__Veillonellaceae;g__Selenomonas			0.000512821		0.02	0	0	0	0	0	0	0	0	0	0	0	0	0	0	0	0	0	0	0	0	0	0	0	0	0	0	0	0	0	0	0	0	0	0	0	0	0	0	0	0	0	0
OTU_714	OTU_714;D_0__Bacteria;D_1__Bacteroidetes;D_2__Bacteroidia;D_3__Bacteroidales;D_4__Porphyromonadaceae;D_5__Tannerella;D_6__unculturedbacterium	k__Bacteria;p__Bacteroidetes;c__Bacteroidia;o__Bacteroidales;f__Porphyromonadaceae;g__Tannerella			0.00461538		0	0	0	0	0	0	0	0	0	0	0	0	0	0	0	0	0	0	0	0	0	0	0	0.1	0	0	0	0	0	0	0	0	0	0	0	0	0	0	0	0	0	0	0
OTU_715	OTU_715;D_0__Bacteria;D_1__Firmicutes;D_2__Bacilli;D_3__Lactobacillales;D_4__Streptococcaceae;D_5__Streptococcus	k__Bacteria;p__Firmicutes;c__Bacilli;o__Lactobacillales;f__Streptococcaceae;g__Streptococcus			0.00435897		0	0	0	0	0	0	0.02	0.02	0	0	0	0	0	0	0	0	0.02	0	0	0	0	0	0	0	0	0	0.02	0	0	0	0	0	0	0	0	0	0	0	0	0	0.02	0.12	0
OTU_716	OTU_716;D_0__Bacteria;D_1__Spirochaetae;D_2__Spirochaetes;D_3__Spirochaetales;D_4__Spirochaetaceae;D_5__Treponema;D_6__Treponemasp.3:E:AT013	k__Bacteria;p__Spirochaetes;c__Spirochaetia;o__Spirochaetales;f__Spirochaetaceae;g__Treponema;s__sp._oral_taxon_254			0.00102564		0	0	0	0	0	0	0	0	0	0	0	0	0	0	0	0	0	0	0	0	0	0.08	0	0	0	0	0	0	0	0	0	0	0	0	0	0	0	0	0	0	0	0	0
OTU_718	OTU_718;D_0__Bacteria;D_1__Spirochaetae;D_2__Spirochaetes;D_3__Spirochaetales;D_4__Spirochaetaceae;D_5__Treponema	k__Bacteria;p__Spirochaetes;c__Spirochaetia;o__Spirochaetales;f__Spirochaetaceae;g__Treponema			0.0138462		0	0	0	0.08	0	0.02	0	0	0.06	0	0	0	0	0	0	0.06	0.02	0	0	0.02	0	0.02	0	0.02	0	0	0.04	0.14	0.04	0	0.02	0	0	0	0	0	0.04	0	0	0	0	0	0
OTU_719	OTU_719;D_0__Bacteria;D_1__Actinobacteria;D_2__Actinobacteria;D_3__Actinomycetales;D_4__Actinomycetaceae;D_5__Actinomyces	k__Bacteria;p__Actinobacteria;c__Actinobacteria;o__Actinomycetales;f__Actinomycetaceae;g__Actinomyces			0.0074359		0	0	0.04	0	0	0	0.02	0	0.02	0	0	0	0	0.06	0	0	0	0	0.02	0	0	0	0	0	0	0	0	0	0	0	0	0	0	0.02	0	0	0.02	0	0.02	0	0.02	0	0.02
OTU_72	OTU_72;D_0__Bacteria;D_1__Bacteroidetes;D_2__Bacteroidia;D_3__Bacteroidales;D_4__Prevotellaceae;D_5__Prevotella;D_6__Prevotellasp.oraltaxonG60	k__Bacteria;p__Bacteroidetes;c__Bacteroidia;o__Bacteroidales;f__Prevotellaceae;g__Prevotella;s__oulorum			0.434359		0.68	0	0	0.76	0.02	1.1	0.94	0.02	0.12	0	0.24	0.22	0.06	0.16	4.98	0.06	0.06	0.68	0	0.04	0.28	0	1.9	1.26	0.04	0	0.56	0.58	0.2	0.34	0.04	0	0.66	0	0	0.04	0.88	0	1.3	0.16	0.12	0.02	0
OTU_720	OTU_720;D_0__Bacteria;D_1__Firmicutes;D_2__Negativicutes;D_3__Selenomonadales;D_4__Veillonellaceae;D_5__Selenomonas	k__Bacteria;p__Firmicutes;c__Negativicutes;o__Selenomonadales;f__Veillonellaceae;g__Veillonellaceae_[G-1];s__sp._oral_taxon_155			0.00282051		0	0	0	0	0	0	0	0	0	0	0	0	0	0	0	0	0.02	0.02	0	0	0	0	0.02	0	0	0	0	0.02	0	0	0	0	0	0	0	0	0	0	0	0	0	0	0
OTU_721	OTU_721;D_0__Bacteria;D_1__Firmicutes;D_2__Bacilli;D_3__Lactobacillales;D_4__Streptococcaceae;D_5__Streptococcus	k__Bacteria;p__Firmicutes;c__Bacilli;o__Lactobacillales;f__Streptococcaceae;g__Streptococcus			0.00025641		0	0	0	0	0	0	0	0	0	0	0	0	0	0	0	0	0	0	0	0	0	0	0	0	0	0	0	0	0	0	0	0	0	0	0	0	0	0	0	0	0	0	0
OTU_723	OTU_723;D_0__Bacteria;D_1__Bacteroidetes;D_2__Bacteroidia;D_3__Bacteroidales;D_4__Prevotellaceae;D_5__Prevotella	k__Bacteria;p__Bacteroidetes;c__Bacteroidia;o__Bacteroidales;f__Prevotellaceae;g__Prevotella			0.00487179		0	0	0	0	0	0	0.02	0	0	0	0	0	0	0	0	0.02	0	0	0	0	0	0	0.1	0	0	0	0	0	0	0.02	0.04	0.02	0	0	0	0	0	0	0.02	0	0	0	0
OTU_724	OTU_724;D_0__Bacteria;D_1__Firmicutes;D_2__Negativicutes;D_3__Selenomonadales;D_4__Veillonellaceae	k__Bacteria;p__Firmicutes;c__Negativicutes;o__Selenomonadales;f__Veillonellaceae;g__Mitsuokella;s__sp._oral_taxon_521			0.000512821		0	0	0	0	0	0	0	0	0	0	0	0	0	0	0	0	0	0	0	0	0	0	0	0.02	0	0	0	0	0	0	0	0	0	0	0	0	0	0	0	0	0	0	0
OTU_725	OTU_725;D_0__Bacteria;D_1__Actinobacteria;D_2__Actinobacteria;D_3__Corynebacteriales;D_4__Corynebacteriaceae;D_5__Corynebacterium	k__Bacteria;p__Actinobacteria;c__Actinobacteria;o__Corynebacteriales;f__Corynebacteriaceae;g__Corynebacterium;s__matruchotii			0.00794872		0	0	0.04	0	0	0	0	0.06	0.02	0	0	0	0	0.02	0	0	0	0	0.16	0	0	0	0	0	0	0.02	0	0	0	0	0	0	0	0.02	0	0	0.02	0	0	0	0	0	0.04
OTU_727	OTU_727;D_0__Bacteria;D_1__Firmicutes;D_2__Negativicutes;D_3__Selenomonadales;D_4__Veillonellaceae;D_5__Veillonella;D_6__unculturedbacterium	k__Bacteria;p__Firmicutes;c__Negativicutes;o__Selenomonadales;f__Veillonellaceae;g__Veillonella;s__parvula			0.00179487		0	0	0	0	0.02	0.02	0	0	0	0	0	0	0	0	0	0	0	0	0	0	0	0	0	0	0	0.02	0	0	0	0.02	0	0	0	0	0	0	0	0	0	0	0	0.02	0
OTU_728	OTU_728;D_0__Bacteria	k__Bacteria			0.000512821		0	0	0	0	0	0	0	0	0	0	0	0	0	0	0	0	0	0	0	0.04	0	0	0	0	0	0	0	0	0	0	0	0	0	0	0	0	0	0	0	0	0	0	0
OTU_73	OTU_73;D_0__Bacteria;D_1__Actinobacteria;D_2__Coriobacteriia;D_3__Coriobacteriales;D_4__Coriobacteriaceae	k__Bacteria;p__Actinobacteria;c__Coriobacteriia;o__Coriobacteriales;f__Atopobiaceae;g__Olsenella;s__sp._oral_taxon_807			0.173077		0.06	0	0	0	0	0.02	0.02	0	0.08	0.02	0	0	0.16	1.46	0	0.42	0.04	0.26	0	0.02	0.06	0.06	0.72	0.06	0	0	0	0.1	0.22	0.06	0.24	0.08	0.5	0.04	0.16	0.04	0.06	0	0.72	0	0	0.02	0
OTU_732	OTU_732;D_0__Bacteria;D_1__Actinobacteria;D_2__Actinobacteria;D_3__Actinomycetales;D_4__Actinomycetaceae;D_5__Actinomyces	k__Bacteria;p__Actinobacteria;c__Actinobacteria;o__Actinomycetales;f__Actinomycetaceae;g__Actinomyces			0.00333333		0	0	0	0	0	0	0	0.02	0	0	0	0.02	0	0	0	0	0	0	0	0.04	0	0	0	0	0	0	0	0	0	0	0	0	0	0	0	0.02	0.02	0	0.02	0	0.04	0	0
OTU_733	OTU_733;D_0__Bacteria;D_1__Firmicutes;D_2__Clostridia;D_3__Clostridiales;D_4__FamilyXIII;D_5__IncertaeSedis	k__Bacteria;p__Firmicutes;c__Clostridia;o__Clostridiales;f__Peptostreptococcaceae_[XI];g__Peptostreptococcaceae_[XI][G-6];s__[Eubacterium]_minutum			0.00128205		0	0	0	0	0	0	0	0	0	0	0	0	0	0.02	0	0	0	0	0	0	0.02	0	0	0	0	0	0	0	0	0	0	0	0	0	0	0	0	0	0	0	0	0	0
OTU_734	OTU_734;D_0__Bacteria;D_1__Proteobacteria;D_2__Betaproteobacteria;D_3__Neisseriales;D_4__Neisseriaceae;D_5__Neisseria;D_6__	k__Bacteria;p__Proteobacteria;c__Betaproteobacteria;o__Neisseriales;f__Neisseriaceae;g__Neisseria;s__oralis			0.00769231		0	0.06	0	0	0	0	0	0	0	0	0	0	0	0	0	0	0	0	0	0.06	0	0	0	0	0	0	0	0	0	0	0	0	0.18	0	0	0	0	0	0	0.02	0	0	0
OTU_735	OTU_735;D_0__Bacteria;D_1__Actinobacteria;D_2__Actinobacteria;D_3__Corynebacteriales;D_4__Corynebacteriaceae;D_5__Corynebacterium;D_6__Corynebacteriummatruchotii	k__Bacteria;p__Actinobacteria;c__Actinobacteria;o__Corynebacteriales;f__Corynebacteriaceae;g__Corynebacterium;s__matruchotii			0.000769231		0	0	0	0	0	0	0	0	0	0	0.02	0	0	0	0	0	0	0	0	0	0	0	0	0	0	0	0	0	0	0	0	0	0	0	0	0	0	0	0	0	0	0	0
OTU_736	OTU_736;D_0__Bacteria;D_1__Bacteroidetes;D_2__Bacteroidia;D_3__Bacteroidales;D_4__Prevotellaceae;D_5__Prevotella;D_6__unculturedbacterium	k__Bacteria;p__Bacteroidetes;c__Bacteroidia;o__Bacteroidales;f__Prevotellaceae;g__Prevotella			0.000512821		0	0	0	0	0	0	0	0	0	0	0	0	0	0	0	0	0	0	0	0	0	0	0	0	0	0	0	0	0	0	0	0.02	0	0	0	0	0	0	0	0	0	0	0
OTU_737	OTU_737;D_0__Bacteria;D_1__Proteobacteria;D_2__Betaproteobacteria;D_3__Neisseriales;D_4__Neisseriaceae	k__Bacteria;p__Proteobacteria;c__Betaproteobacteria;o__Neisseriales;f__Neisseriaceae;(g__Kingella/g__Neisseria);D_6__			0.00230769		0	0	0.04	0	0	0	0	0	0.02	0	0	0	0	0	0	0	0.02	0	0	0.02	0	0	0	0	0	0	0.02	0	0	0	0	0	0	0	0	0	0	0.04	0	0	0	0	0
OTU_738	OTU_738;D_0__Bacteria;D_1__Bacteroidetes;D_2__Flavobacteriia;D_3__Flavobacteriales;D_4__Flavobacteriaceae;D_5__Capnocytophaga	k__Bacteria;p__Bacteroidetes;c__Flavobacteriia;o__Flavobacteriales;f__Flavobacteriaceae;g__Capnocytophaga;(s__sp._oral_taxon_335/s__sp._oral_taxon_336)			0.000512821		0	0	0	0	0	0	0	0	0	0	0	0	0	0	0	0	0	0	0	0	0	0	0	0	0	0	0	0	0	0	0	0	0	0	0	0	0	0	0	0	0	0	0
OTU_739	OTU_739;D_0__Bacteria;D_1__Firmicutes;D_2__Negativicutes;D_3__Selenomonadales;D_4__Veillonellaceae;D_5__Selenomonas	k__Bacteria;p__Firmicutes;c__Negativicutes;o__Selenomonadales;f__Veillonellaceae;g__Selenomonas;s__sp._oral_taxon_134			0.000512821		0	0	0	0	0	0	0	0	0	0	0	0	0	0	0	0	0	0	0	0	0	0	0	0	0	0	0	0	0	0	0	0	0	0	0	0	0	0	0	0	0	0	0
OTU_74	OTU_74;D_0__Bacteria;D_1__Firmicutes;D_2__Clostridia;D_3__Clostridiales;D_4__Lachnospiraceae;D_5__Johnsonella;D_6__Johnsonellaignava	k__Bacteria;p__Firmicutes;c__Clostridia;o__Clostridiales;f__Lachnospiraceae_[XIV];g__Johnsonella;s__ignava			0.0551282		0.04	0	0	0	0	0	0	0	0	0	1.3	0	0	0	0	0	0.02	0.02	0.06	0.02	0.1	0	0	0.16	0	0.06	0.16	0	0.08	0	0.1	0.04	0	0	0	0	0.22	0	0	0.14	0.1	0	0
OTU_740	OTU_740;D_0__Bacteria;D_1__Bacteroidetes;D_2__Bacteroidia;D_3__Bacteroidales;D_4__Prevotellaceae;D_5__Prevotella	k__Bacteria;p__Bacteroidetes;c__Bacteroidia;o__Bacteroidales;f__Prevotellaceae;g__Prevotella;s__oris			0.00307692		0	0	0	0	0	0	0	0	0	0	0	0	0	0.02	0	0	0	0	0	0	0	0	0	0	0	0	0	0.1	0	0	0	0	0	0	0	0	0	0	0.02	0	0	0	0
OTU_742	OTU_742;D_0__Bacteria;D_1__Firmicutes;D_2__Bacilli;D_3__Lactobacillales;D_4__Streptococcaceae;D_5__Streptococcus	k__Bacteria;p__Firmicutes;c__Bacilli;o__Lactobacillales;f__Streptococcaceae;g__Streptococcus;s__constellatus			0.000769231		0	0	0	0	0	0	0	0	0	0	0	0	0	0	0	0	0	0	0.02	0	0	0	0	0	0	0	0	0	0	0	0	0	0	0	0	0	0	0	0	0	0	0	0
OTU_743	OTU_743;D_0__Bacteria;D_1__Firmicutes;D_2__Negativicutes;D_3__Selenomonadales;D_4__Veillonellaceae;D_5__Selenomonas	k__Bacteria;p__Firmicutes;c__Negativicutes;o__Selenomonadales;f__Veillonellaceae;g__Selenomonas;s__sp._oral_taxon_134			0.00025641		0	0	0	0	0	0	0	0	0	0	0	0	0	0	0	0	0	0	0	0	0	0	0	0	0	0	0	0	0	0	0	0	0	0	0	0	0	0	0	0	0	0	0
OTU_744	OTU_744;D_0__Bacteria;D_1__Bacteroidetes;D_2__Bacteroidia;D_3__Bacteroidales;D_4__Prevotellaceae;D_5__Prevotella;D_6__	k__Bacteria;p__Bacteroidetes;c__Bacteroidia;o__Bacteroidales;f__Prevotellaceae;g__Prevotella;s__pleuritidis			0.00025641		0	0	0	0	0	0	0	0	0	0	0	0	0	0	0	0	0	0	0	0	0	0	0	0	0	0	0	0	0	0	0	0	0	0	0	0	0	0	0	0	0	0	0
OTU_746	OTU_746;D_0__Bacteria;D_1__Bacteroidetes;D_2__Bacteroidia;D_3__Bacteroidales;D_4__Prevotellaceae;D_5__Prevotella;D_6__	k__Bacteria;p__Bacteroidetes;c__Bacteroidia;o__Bacteroidales;f__Prevotellaceae;g__Prevotella;s__nigrescens			0.00333333		0	0	0	0	0	0	0	0	0	0	0	0	0	0	0	0	0	0	0	0	0	0	0	0	0	0	0	0.06	0	0.02	0	0	0.04	0	0	0	0	0	0.02	0	0	0	0
OTU_747	OTU_747;D_0__Bacteria;D_1__Firmicutes;D_2__Clostridia;D_3__Clostridiales;D_4__FamilyXIII;D_5__IncertaeSedis;D_6__[Eubacterium]infirmum	k__Bacteria;p__Firmicutes;c__Clostridia;o__Clostridiales;f__Peptostreptococcaceae_[XI];g__Peptostreptococcaceae_[XI][G-1]			0.00025641		0	0	0	0	0	0	0	0	0	0	0	0	0	0	0	0	0	0	0	0	0	0	0	0	0	0	0	0	0	0	0	0	0	0	0	0	0	0	0	0	0	0	0
OTU_748	OTU_748;D_0__Bacteria;D_1__Firmicutes;D_2__Negativicutes;D_3__Selenomonadales;D_4__Veillonellaceae	k__Bacteria;p__Firmicutes;c__Negativicutes;o__Selenomonadales;f__Veillonellaceae			0.000512821		0	0	0	0	0	0	0	0	0	0	0	0	0	0	0	0	0	0	0	0	0	0	0	0	0	0	0	0	0	0	0	0	0	0	0	0	0	0	0	0	0	0	0
OTU_749	OTU_749;D_0__Bacteria;D_1__Synergistetes;D_2__Synergistia;D_3__Synergistales;D_4__Synergistaceae	k__Bacteria;p__Synergistetes;c__Synergistia;o__Synergistales;f__Synergistaceae;g__Fretibacterium			0.00102564		0	0	0	0	0	0	0	0	0	0	0	0	0	0	0	0	0	0	0	0	0	0	0	0	0	0	0	0	0	0	0	0	0	0	0	0	0	0	0	0	0	0	0
OTU_75	OTU_75;D_0__Bacteria;D_1__Actinobacteria;D_2__Actinobacteria;D_3__Actinomycetales;D_4__Actinomycetaceae;D_5__Actinomyces;D_6__Actinomycessp.oralcloneGU009	k__Bacteria;p__Actinobacteria;c__Actinobacteria;o__Actinomycetales;f__Actinomycetaceae;g__Actinomyces;s__sp._oral_taxon_525			0.227436		0.08	0	0.02	0.04	0	0.1	0.08	0	0.04	0.04	0.1	0.2	0.78	0.68	0.86	0.26	0.04	0.44	0	0.04	0.28	0.06	0.1	0.68	0	0.02	0	0.1	0.48	0.04	0.18	0.48	0.1	0.04	0.44	0.26	0.08	0.02	0.08	0.12	0.02	0	0.1
OTU_753	OTU_753;D_0__Bacteria;D_1__Proteobacteria;D_2__Gammaproteobacteria;D_3__Cardiobacteriales;D_4__Cardiobacteriaceae;D_5__Cardiobacterium;D_6__Cardiobacteriumvalvarum	k__Bacteria;p__Proteobacteria;c__Gammaproteobacteria;o__Cardiobacteriales;f__Cardiobacteriaceae;g__Cardiobacterium;s__valvarum			0.00307692		0	0	0.02	0	0	0	0	0	0	0	0	0	0	0	0	0	0	0	0	0	0	0	0	0	0	0.02	0	0	0	0	0	0	0	0.02	0.04	0	0	0	0	0	0	0	0.04
OTU_755	OTU_755;D_0__Bacteria;D_1__Actinobacteria;D_2__Actinobacteria;D_3__Propionibacteriales;D_4__Propionibacteriaceae;D_5__uncultured;D_6__Propionibacteriumsp.canineoraltaxon365	k__Bacteria;p__Actinobacteria;c__Actinobacteria;o__Propionibacteriales;f__Propionibacteriaceae;g__Propionibacterium			0.00025641		0	0	0	0	0	0	0	0	0	0	0	0	0	0	0	0	0	0	0	0	0	0	0	0	0	0	0.02	0	0	0	0	0	0	0	0	0	0	0	0	0	0	0	0
OTU_756	OTU_756;D_0__Bacteria;D_1__Bacteroidetes;D_2__Bacteroidia;D_3__Bacteroidales;D_4__Prevotellaceae	k__Bacteria;p__Bacteroidetes;c__Bacteroidia;o__Bacteroidales;f__Prevotellaceae;g__Prevotella			0.000512821		0	0	0	0	0	0	0	0	0	0	0	0	0	0	0	0	0	0	0	0	0	0	0	0	0	0	0	0.02	0	0	0	0	0	0	0	0	0	0	0	0	0	0	0
OTU_76	OTU_76;D_0__Bacteria;D_1__Firmicutes;D_2__Clostridia;D_3__Clostridiales;D_4__Lachnospiraceae;D_5__Lachnoanaerobaculum;D_6__unculturedbacterium	k__Bacteria;p__Firmicutes;c__Clostridia;o__Clostridiales;f__Lachnospiraceae_[XIV];g__Lachnoanaerobaculum;s__saburreum			0.252564		0.8	0	0.24	0.34	0.02	0.26	0.52	0.04	0	0	0.92	0.02	0	0.66	0.68	0.02	0.04	0.14	0.06	0.22	0.04	0	0.06	1.2	0.02	0.02	0.22	0.1	0.04	0.16	0.12	0.24	1.76	0.18	0.02	0.86	0.86	0.14	0.72	0	0.02	0.02	0
OTU_760	OTU_760;D_0__Bacteria;D_1__Bacteroidetes;D_2__Bacteroidia;D_3__Bacteroidales;D_4__Prevotellaceae;D_5__Prevotella	k__Bacteria;p__Bacteroidetes;c__Bacteroidia;o__Bacteroidales;f__Prevotellaceae;g__Prevotella			0.00538462		0	0	0	0	0	0	0	0	0	0	0	0	0	0	0	0.06	0.02	0	0	0	0	0	0	0	0	0	0	0	0	0	0	0.1	0.06	0	0	0	0	0	0	0	0	0	0
OTU_762	OTU_762;D_0__Bacteria;D_1__Actinobacteria;D_2__Actinobacteria;D_3__Actinomycetales;D_4__Actinomycetaceae;D_5__Actinomyces;D_6__unculturedbacterium	k__Bacteria;p__Actinobacteria;c__Actinobacteria;o__Actinomycetales;f__Actinomycetaceae;g__Actinomyces			0.0317949		0.02	0.08	0.04	0	0.04	0.02	0.02	0.04	0.04	0.04	0.04	0.04	0.04	0.06	0	0.08	0	0.02	0.02	0	0	0	0.06	0.12	0	0.04	0	0.06	0	0	0.04	0	0.06	0	0.04	0	0.06	0.02	0.04	0.04	0.04	0.08	0.08
OTU_764	OTU_764;D_0__Bacteria;D_1__Firmicutes;D_2__Negativicutes;D_3__Selenomonadales;D_4__Veillonellaceae;D_5__Veillonella;D_6__	k__Bacteria;p__Firmicutes;c__Negativicutes;o__Selenomonadales;f__Veillonellaceae;g__Veillonella;s__parvula			0.00230769		0	0	0.04	0	0	0	0.02	0	0	0	0	0.02	0	0	0	0	0	0	0	0	0	0	0	0	0	0.02	0	0	0	0	0	0	0	0	0	0	0	0.02	0	0	0	0	0
OTU_769	OTU_769;D_0__Bacteria;D_1__Bacteroidetes;D_2__Bacteroidia;D_3__Bacteroidales;D_4__Prevotellaceae;D_5__Prevotella	k__Bacteria;p__Bacteroidetes;c__Bacteroidia;o__Bacteroidales;f__Prevotellaceae;g__Prevotella;s__oris			0.00692308		0.04	0	0	0.06	0	0.04	0.06	0	0	0	0	0	0	0	0	0	0	0	0	0	0	0	0	0	0	0	0	0	0	0	0.08	0	0	0	0	0	0	0	0	0	0	0	0.02
OTU_77	OTU_77;D_0__Bacteria;D_1__Firmicutes;D_2__Clostridia;D_3__Clostridiales;D_4__Peptostreptococcaceae;D_5__IncertaeSedis;D_6__Eubacteriumsp.oralstrainA03MT	k__Bacteria;p__Firmicutes;c__Clostridia;o__Clostridiales;f__Peptostreptococcaceae_[XI];g__Peptostreptococcaceae_[XI][G-7];(s__[Eubacterium]_yurii_subsp._schtitka/s__[Eubacterium]_yurii_subsps._yurii_&_margaretiae)			0.0617949		0	0.02	0	0.32	0	0	0.04	0	0	0	0.28	0.16	0	0	0	0	0	0.02	0	0.14	0.14	0.04	0	0.04	0	0	0.46	0	0.06	0	0	0.06	0.26	0.04	0.26	0	0.06	0.22	0	0	0.02	0	0
OTU_773	OTU_773;D_0__Bacteria;D_1__Firmicutes;D_2__Bacilli;D_3__Lactobacillales;D_4__Streptococcaceae;D_5__Streptococcus	k__Bacteria;p__Firmicutes;c__Bacilli;o__Lactobacillales;f__Streptococcaceae;g__Streptococcus			0.00153846		0	0	0	0	0	0	0	0	0	0	0	0	0	0	0	0	0	0	0	0.02	0	0	0	0	0	0	0	0	0	0	0	0	0	0	0	0	0	0	0.02	0	0	0	0
OTU_774	OTU_774;D_0__Bacteria;D_1__Bacteroidetes;D_2__Bacteroidia;D_3__Bacteroidales;D_4__Prevotellaceae;D_5__Prevotella	k__Bacteria;p__Bacteroidetes;c__Bacteroidia;o__Bacteroidales;f__Prevotellaceae;g__Prevotella;s__oris			0.0276923		0	0	0.02	0.08	0	0.06	0.02	0.02	0	0	0.14	0.18	0	0.06	0.3	0	0.08	0	0	0	0.04	0	0.02	0.04	0	0	0	0.52	0	0	0	0.02	0	0	0	0	0	0	0.04	0.08	0	0.02	0
OTU_775	OTU_775;D_0__Bacteria;D_1__Firmicutes;D_2__Negativicutes;D_3__Selenomonadales;D_4__Veillonellaceae	k__Bacteria;p__Firmicutes;c__Negativicutes;o__Selenomonadales;f__Veillonellaceae;g__Veillonella			0.00410256		0	0	0	0	0	0	0	0	0.04	0.04	0	0	0	0	0	0	0	0	0	0	0	0	0	0	0	0.02	0	0	0	0	0	0.02	0	0	0	0.02	0	0	0	0	0.02	0.04	0
OTU_776	OTU_776;D_0__Bacteria;D_1__Firmicutes;D_2__Clostridia;D_3__Clostridiales;D_4__FamilyXIII;D_5__Mogibacterium;D_6__unculturedbacterium	k__Bacteria;p__Firmicutes;c__Clostridia;o__Clostridiales;f__Peptostreptococcaceae_[XI];g__Mogibacterium;(s__diversum/s__neglectum/s__pumilum/s__vescum)			0.00025641		0	0	0	0	0	0	0	0	0	0	0	0	0	0	0	0	0	0	0	0	0	0	0	0	0	0	0	0	0	0	0	0	0	0	0	0	0	0	0	0	0	0	0
OTU_778	OTU_778;D_0__Bacteria;D_1__Actinobacteria;D_2__Actinobacteria	k__Bacteria;p__Actinobacteria;c__Actinobacteria;o__Actinomycetales			0.00358974		0	0	0	0	0	0	0	0	0.02	0.02	0	0	0	0.02	0	0	0	0	0	0	0	0	0	0	0	0	0	0	0	0	0	0	0	0	0.02	0	0	0.02	0.04	0.02	0	0.08	0
OTU_779	OTU_779;D_0__Bacteria;D_1__Actinobacteria;D_2__Actinobacteria;D_3__Bifidobacteriales;D_4__Bifidobacteriaceae	k__Bacteria;p__Actinobacteria;c__Actinobacteria;o__Bifidobacteriales;f__Bifidobacteriaceae;g__Scardovia;s__wiggsiae			0.00025641		0	0	0	0	0	0	0	0	0	0	0	0	0	0	0	0	0	0	0	0	0	0	0	0	0	0	0	0	0	0	0	0	0	0	0	0	0	0	0	0	0	0	0
OTU_78	OTU_78;D_0__Bacteria;D_1__Actinobacteria;D_2__Coriobacteriia;D_3__Coriobacteriales;D_4__Coriobacteriaceae;D_5__Atopobium;D_6__	k__Bacteria;p__Actinobacteria;c__Coriobacteriia;o__Coriobacteriales;f__Coriobacteriaceae;g__Atopobium;s__rimae			0.303333		0	0	0	0	0	0.14	0.14	0.04	0.04	0.1	0	0.06	0.28	0.22	0	0.02	0	0.46	0	0	0.26	0	0.24	0	0	0	0	0.92	0.06	0.12	1.06	0	0.04	0	0.02	0	0	0	0.1	0.02	0	0	0
OTU_780	OTU_780;D_0__Bacteria;D_1__Proteobacteria;D_2__Gammaproteobacteria;D_3__Cardiobacteriales;D_4__Cardiobacteriaceae;D_5__Cardiobacterium	k__Bacteria;p__Proteobacteria;c__Gammaproteobacteria;o__Cardiobacteriales;f__Cardiobacteriaceae;g__Cardiobacterium			0.00025641		0	0	0	0	0	0	0	0	0	0	0	0	0	0	0	0	0	0	0	0	0	0	0	0	0	0	0	0	0	0	0	0	0	0	0	0	0	0	0	0	0	0	0
OTU_782	OTU_782;D_0__Bacteria;D_1__Bacteroidetes;D_2__Bacteroidia;D_3__Bacteroidales;D_4__Prevotellaceae;D_5__Prevotella	k__Bacteria;p__Bacteroidetes;c__Bacteroidia;o__Bacteroidales;f__Prevotellaceae;g__Prevotella;s__oulorum			0.00846154		0	0	0	0	0	0	0.02	0	0	0	0.02	0	0	0	0.2	0	0	0.02	0	0	0	0	0.06	0	0	0	0.02	0.06	0	0	0	0	0	0	0	0	0	0	0.06	0	0	0	0
OTU_783	OTU_783;D_0__Bacteria;D_1__Firmicutes;D_2__Negativicutes;D_3__Selenomonadales;D_4__Veillonellaceae;D_5__Selenomonas;D_6__	k__Bacteria;p__Firmicutes;c__Negativicutes;o__Selenomonadales;f__Veillonellaceae;g__Selenomonas			0.00282051		0.02	0	0	0	0	0	0	0	0	0	0.02	0	0	0	0	0	0	0	0	0	0	0	0	0	0	0	0	0	0	0	0	0	0	0	0.04	0.02	0	0.02	0	0	0	0	0
OTU_784	OTU_784;D_0__Bacteria;D_1__Firmicutes;D_2__Negativicutes;D_3__Selenomonadales;D_4__Veillonellaceae;D_5__Selenomonas	k__Bacteria;p__Firmicutes;c__Negativicutes;o__Selenomonadales;f__Veillonellaceae;g__Selenomonas			0.00153846		0	0	0	0	0	0	0.02	0	0	0	0	0	0	0.04	0	0	0	0	0	0	0	0	0	0	0	0	0	0	0	0	0	0	0	0	0	0	0	0	0	0	0	0	0
OTU_785	OTU_785;D_0__Bacteria;D_1__Actinobacteria;D_2__Coriobacteriia;D_3__Coriobacteriales;D_4__Coriobacteriaceae;D_5__Atopobium;D_6__	k__Bacteria;p__Actinobacteria;c__Coriobacteriia;o__Coriobacteriales;f__Coriobacteriaceae;g__Atopobium;s__rimae			0.00025641		0	0	0	0	0	0	0	0	0	0	0	0	0	0	0	0	0	0	0	0	0	0	0	0	0	0	0	0	0	0	0	0	0	0	0	0	0	0	0	0	0	0	0
OTU_787	OTU_787;D_0__Bacteria;D_1__Firmicutes;D_2__Negativicutes;D_3__Selenomonadales;D_4__Veillonellaceae;D_5__Veillonella;D_6__	k__Bacteria;p__Firmicutes;c__Negativicutes;o__Selenomonadales;f__Veillonellaceae;g__Veillonella			0.00025641		0	0	0	0	0	0	0	0	0	0	0	0	0	0	0	0	0	0	0	0	0	0	0	0	0	0	0	0	0	0	0	0	0	0	0	0	0	0	0	0	0	0	0
OTU_789	OTU_789;D_0__Bacteria;D_1__Proteobacteria;D_2__Gammaproteobacteria;D_3__Cardiobacteriales;D_4__Cardiobacteriaceae;D_5__Cardiobacterium	k__Bacteria;p__Proteobacteria;c__Gammaproteobacteria;o__Cardiobacteriales;f__Cardiobacteriaceae;g__Cardiobacterium;s__hominis			0.00179487		0	0	0	0	0	0	0	0	0	0	0	0	0	0	0	0	0	0	0	0	0	0	0	0	0	0.02	0	0	0	0	0	0	0	0	0	0.02	0	0	0	0	0	0	0.08
OTU_79	OTU_79;D_0__Bacteria;D_1__Spirochaetae;D_2__Spirochaetes;D_3__Spirochaetales;D_4__Spirochaetaceae;D_5__Treponema	k__Bacteria;p__Spirochaetes;c__Spirochaetia;o__Spirochaetales;f__Spirochaetaceae;g__Treponema;s__sp._oral_taxon_927			0.0305128		0	0	0	0	0	0	0	0	0	0	0	0	0	0	0	0	0	0	0	0	0	0	0	0	0	0	0	0	0	0	0	0	0	0	0	0	0	0	0	0	0	0	0
OTU_791	OTU_791;D_0__Bacteria;D_1__Bacteroidetes;D_2__Bacteroidia;D_3__Bacteroidales;D_4__Prevotellaceae;D_5__Prevotella	k__Bacteria;p__Bacteroidetes;c__Bacteroidia;o__Bacteroidales;f__Prevotellaceae;g__Prevotella			0.00205128		0	0	0	0.02	0	0	0	0	0	0	0	0	0	0	0	0	0	0	0	0	0	0	0	0	0	0	0	0	0	0	0	0	0	0	0	0	0	0	0.02	0	0	0.02	0
OTU_792	OTU_792;D_0__Bacteria;D_1__Fusobacteria;D_2__Fusobacteriia;D_3__Fusobacteriales;D_4__Leptotrichiaceae;D_5__Leptotrichia	k__Bacteria;p__Fusobacteria;c__Fusobacteriia;o__Fusobacteriales;f__Leptotrichiaceae;g__Leptotrichia;s__sp._oral_taxon_225			0.00358974		0	0	0.06	0	0	0	0	0	0	0.02	0.02	0	0	0	0	0	0	0	0	0	0	0	0	0	0	0	0	0	0	0	0	0	0.04	0	0	0	0	0	0	0	0	0	0.02
OTU_793	OTU_793;D_0__Bacteria;D_1__Firmicutes;D_2__Negativicutes;D_3__Selenomonadales;D_4__Veillonellaceae;D_5__Selenomonas	k__Bacteria;p__Firmicutes;c__Negativicutes;o__Selenomonadales;f__Veillonellaceae			0.00512821		0	0	0	0	0	0	0.02	0	0.02	0.02	0	0	0	0	0	0	0	0	0	0	0	0	0	0	0	0.04	0	0	0	0	0	0	0.02	0	0	0.02	0.04	0	0.02	0	0	0.02	0
OTU_794	OTU_794;D_0__Bacteria;D_1__Firmicutes;D_2__Negativicutes;D_3__Selenomonadales;D_4__Veillonellaceae	k__Bacteria;p__Firmicutes;c__Negativicutes;o__Selenomonadales;f__Veillonellaceae			0.000512821		0	0	0	0	0	0	0	0	0	0	0	0	0	0	0	0	0	0	0	0	0	0	0	0	0	0.02	0	0	0	0	0	0	0	0	0	0	0	0	0	0	0	0	0
OTU_795	OTU_795;D_0__Bacteria;D_1__Firmicutes;D_2__Negativicutes;D_3__Selenomonadales;D_4__Veillonellaceae;D_5__Veillonella;D_6__	k__Bacteria;p__Firmicutes;c__Negativicutes;o__Selenomonadales;f__Veillonellaceae;g__Veillonella			0.0120513		0	0.1	0.02	0	0.06	0.02	0	0.08	0.02	0	0	0.02	0	0	0.02	0	0	0.04	0	0.06	0	0	0	0	0	0.04	0.08	0	0	0.02	0	0	0	0.02	0	0.02	0	0.08	0	0.02	0.08	0	0
OTU_796	OTU_796;D_0__Bacteria;D_1__Proteobacteria;D_2__Gammaproteobacteria;D_3__Pasteurellales;D_4__Pasteurellaceae	k__Bacteria;p__Proteobacteria;c__Gammaproteobacteria;o__Pasteurellales;f__Pasteurellaceae;g__Aggregatibacter;(s__segnis/s__sp._oral_taxon_458/s__sp._oral_taxon_512)			0.00102564		0	0.02	0	0	0	0	0	0	0	0	0	0	0	0	0	0	0	0	0	0	0	0	0	0	0	0	0	0	0	0	0	0	0	0	0	0	0	0	0.02	0	0	0	0
OTU_797	OTU_797;D_0__Bacteria;D_1__Firmicutes;D_2__Negativicutes;D_3__Selenomonadales;D_4__Veillonellaceae;D_5__Selenomonas	k__Bacteria;p__Firmicutes;c__Negativicutes;o__Selenomonadales;f__Veillonellaceae;g__Veillonellaceae_[G-1]			0.00358974		0	0	0	0	0	0.04	0	0	0	0	0	0	0.1	0.02	0	0	0	0	0	0	0	0	0	0	0	0	0	0	0.02	0	0	0	0	0	0	0	0	0	0	0	0	0	0
OTU_8	OTU_8;D_0__Bacteria;D_1__Firmicutes;D_2__Bacilli;D_3__Lactobacillales;D_4__Streptococcaceae;D_5__Streptococcus;D_6__unculturedbacterium	k__Bacteria;p__Firmicutes;c__Bacilli;o__Lactobacillales;f__Streptococcaceae;g__Streptococcus;(s__dentisani/s__infantis/s__mitis/s__oralis/s__sp._oral_taxon_058/s__sp._oral_taxon_061/s__sp._oral_taxon_064/s__sp._oral_taxon_070/s__sp._oral_taxon_423/s__sp._oral_taxon_431/s__tigurinus)			1.34333		0.24	2.12	4.58	0.76	0.44	0.22	0.28	6.56	2.86	0.28	0.58	0.82	0.02	0.28	0.16	0.12	0.3	0.14	2.3	4.02	1.22	0.08	0.02	0.14	0.08	0.2	4.5	0.1	0.48	0.68	0.02	1	0.26	0.18	0.32	2.18	0.02	1.84	0.22	0.28	10.82	4.82	6.38
OTU_80	OTU_80;D_0__Bacteria;D_1__Firmicutes;D_2__Negativicutes;D_3__Selenomonadales;D_4__Veillonellaceae;D_5__Dialister	k__Bacteria;p__Firmicutes;c__Negativicutes;o__Selenomonadales;f__Veillonellaceae;g__Dialister;s__pneumosintes			0.129744		0	0	0	0	0	0.12	0.16	0.04	0	0.02	0	0.12	0.16	0.02	0	0.08	0.2	0.08	0	0	0.36	0	0	0.02	0.1	0	0.02	0.18	0.08	0.4	0	0.32	0.14	0	0.22	0	0	0	0.02	0.02	0	0	0
OTU_802	OTU_802;D_0__Bacteria;D_1__Proteobacteria;D_2__Betaproteobacteria;D_3__Neisseriales;D_4__Neisseriaceae;D_5__Neisseria	k__Bacteria;p__Proteobacteria;c__Betaproteobacteria;o__Neisseriales;f__Neisseriaceae;g__Neisseria			0.0115385		0	0	0.04	0	0.04	0.02	0	0	0.12	0	0	0	0	0	0	0	0.08	0.04	0	0	0	0	0	0	0	0	0.1	0	0	0	0	0	0	0	0	0.14	0	0.04	0	0	0	0	0
OTU_803	OTU_803;D_0__Bacteria;D_1__Firmicutes;D_2__Negativicutes;D_3__Selenomonadales;D_4__Veillonellaceae;D_5__Veillonella	k__Bacteria;p__Firmicutes;c__Negativicutes;o__Selenomonadales;f__Veillonellaceae;g__Veillonella			0.000512821		0	0	0	0	0	0	0	0.02	0	0	0	0	0	0	0	0	0.02	0	0	0	0	0	0	0	0	0	0	0	0	0	0	0	0	0	0	0	0	0	0	0	0	0	0
OTU_804	OTU_804;D_0__Bacteria;D_1__Actinobacteria;D_2__Actinobacteria;D_3__Corynebacteriales;D_4__Corynebacteriaceae;D_5__Corynebacterium;D_6__Corynebacteriummatruchotii	k__Bacteria;p__Actinobacteria;c__Actinobacteria;o__Corynebacteriales;f__Corynebacteriaceae;g__Corynebacterium;s__matruchotii			0.00153846		0	0	0	0	0	0	0	0	0	0	0.02	0	0	0	0	0	0	0	0	0	0	0	0	0	0	0	0	0	0	0	0	0	0	0	0	0	0	0	0	0	0	0	0
OTU_805	OTU_805;D_0__Bacteria;D_1__Actinobacteria;D_2__Actinobacteria;D_3__Actinomycetales;D_4__Actinomycetaceae;D_5__Actinomyces	k__Bacteria;p__Actinobacteria;c__Actinobacteria;o__Actinomycetales;f__Actinomycetaceae;g__Actinomyces;s__gerencseriae			0.00205128		0	0	0	0	0	0	0	0	0	0	0	0.02	0	0	0.02	0	0	0	0.02	0	0	0	0	0	0	0	0	0	0	0	0	0	0	0	0	0	0.02	0	0	0	0.02	0	0.02
OTU_809	OTU_809;D_0__Bacteria;D_1__Bacteroidetes;D_2__Bacteroidia;D_3__Bacteroidales;D_4__Prevotellaceae;D_5__Prevotella	k__Bacteria;p__Bacteroidetes;c__Bacteroidia;o__Bacteroidales;f__Prevotellaceae;g__Prevotella			0.00102564		0	0	0	0	0	0	0	0	0	0	0	0	0	0	0	0	0	0	0	0	0	0	0	0	0	0	0	0	0.04	0	0	0	0	0	0	0	0	0	0	0	0	0	0
OTU_81	OTU_81;D_0__Bacteria;D_1__Proteobacteria;D_2__Deltaproteobacteria;D_3__Desulfobacterales;D_4__Desulfobulbaceae;D_5__Desulfobulbus;D_6__	k__Bacteria;p__Proteobacteria;c__Deltaproteobacteria;o__Desulfobacterales;f__Desulfobulbaceae;g__Desulfobulbus;s__sp._oral_taxon_041			0.0484615		0	0.02	0	0	0	0	0	0	0	0.06	0.08	0.08	0	0	0	0.12	0	0.02	0	0.02	0	0	0	0	0	0	0	0	0	0.18	0	0	0.18	0	0	0	0.02	0	0	0.08	0	0	0
OTU_810	OTU_810;D_0__Bacteria;D_1__Actinobacteria;D_2__Actinobacteria;D_3__Actinomycetales;D_4__Actinomycetaceae;D_5__Actinomyces	k__Bacteria;p__Actinobacteria;c__Actinobacteria;o__Actinomycetales;f__Actinomycetaceae;g__Actinomyces;s__meyeri			0.000512821		0	0	0	0	0	0	0	0	0	0	0	0	0	0	0	0	0	0	0	0	0	0	0	0	0	0	0	0	0	0	0	0	0	0	0	0	0	0	0	0	0	0	0
OTU_813	OTU_813;D_0__Bacteria;D_1__Actinobacteria;D_2__Actinobacteria;D_3__Actinomycetales;D_4__Actinomycetaceae;D_5__Actinomyces;D_6__unculturedbacterium	k__Bacteria;p__Actinobacteria;c__Actinobacteria;o__Actinomycetales;f__Actinomycetaceae;g__Actinomyces			0.00307692		0	0	0	0	0	0	0	0	0	0	0	0	0	0	0	0	0	0	0	0	0.02	0	0	0	0	0	0	0	0	0	0	0	0	0	0	0	0	0	0	0	0	0.02	0
OTU_814	OTU_814;D_0__Bacteria;D_1__Actinobacteria;D_2__Actinobacteria;D_3__Corynebacteriales;D_4__Corynebacteriaceae;D_5__Corynebacterium;D_6__Corynebacteriummatruchotii	k__Bacteria;p__Actinobacteria;c__Actinobacteria;o__Corynebacteriales;f__Corynebacteriaceae;g__Corynebacterium;s__matruchotii			0.000769231		0	0	0	0.02	0	0	0	0	0	0	0	0	0	0	0	0	0	0	0	0	0	0	0	0	0	0	0	0	0	0	0	0	0	0	0	0	0	0	0	0	0	0	0
OTU_816	OTU_816;D_0__Bacteria;D_1__Firmicutes;D_2__Negativicutes;D_3__Selenomonadales;D_4__Veillonellaceae	k__Bacteria;p__Firmicutes;c__Negativicutes;o__Selenomonadales;f__Veillonellaceae;g__Centipeda;s__periodontii			0.0074359		0	0	0	0.1	0	0	0	0	0	0	0	0	0	0	0	0	0	0.02	0	0	0	0	0	0.02	0	0	0	0.02	0	0	0	0	0	0	0	0	0.02	0	0.04	0.04	0	0	0
OTU_82	OTU_82;D_0__Bacteria;D_1__Fusobacteria;D_2__Fusobacteriia;D_3__Fusobacteriales;D_4__Leptotrichiaceae;D_5__Leptotrichia;D_6__	k__Bacteria;p__Fusobacteria;c__Fusobacteriia;o__Fusobacteriales;f__Leptotrichiaceae;g__Leptotrichia;s__goodfellowii			0.107436		0	0	0	0	0	0	0.14	0.02	0	0.2	0	0	0	0	0	0	0	0.04	0	0.1	0	0	0	0	0	3.86	0.34	0	0	0.02	0.02	0	0	0	0	0.02	0.06	0	0.1	0	0	0	0.04
OTU_820	OTU_820;D_0__Bacteria	k__Bacteria;p__Firmicutes;c__Negativicutes;o__Selenomonadales;f__Veillonellaceae;g__Selenomonas			0.00102564		0	0	0	0	0	0	0	0	0.02	0	0	0	0	0.02	0	0	0	0	0	0	0	0	0	0	0	0	0	0	0	0	0	0	0	0	0	0	0.02	0	0	0	0	0	0
OTU_827	OTU_827;D_0__Bacteria;D_1__Actinobacteria;D_2__Actinobacteria;D_3__Actinomycetales;D_4__Actinomycetaceae;D_5__Actinobaculum	k__Bacteria;p__Actinobacteria;c__Actinobacteria;o__Actinomycetales;f__Actinomycetaceae;g__Actinobaculum;s__sp._oral_taxon_183			0.00025641		0	0	0	0	0	0	0	0	0	0	0	0	0	0	0	0	0	0	0	0	0	0	0	0	0	0	0	0	0	0	0	0	0	0	0	0	0	0	0	0	0	0	0
OTU_828	OTU_828;D_0__Bacteria;D_1__Fusobacteria;D_2__Fusobacteriia;D_3__Fusobacteriales;D_4__Leptotrichiaceae;D_5__Leptotrichia;D_6__unculturedbacterium	k__Bacteria;p__Fusobacteria;c__Fusobacteriia;o__Fusobacteriales;f__Leptotrichiaceae;g__Leptotrichia;s__sp._oral_taxon_223			0.0371795		0.02	0	0	0	0	0	0.02	0	0	0	0.06	0	0	0	0.54	0	0	0	0	0	0	0	0	0.02	0	0	0	0	0.04	0	0.04	0	0.04	0	0	0.02	0.02	0	0	0	0	0	0
OTU_830	OTU_830;D_0__Bacteria;D_1__Fusobacteria;D_2__Fusobacteriia;D_3__Fusobacteriales;D_4__Leptotrichiaceae;D_5__Leptotrichia;D_6__unculturedbacterium	k__Bacteria;p__Fusobacteria;c__Fusobacteriia;o__Fusobacteriales;f__Leptotrichiaceae;g__Leptotrichia			0.0153846		0	0	0.02	0.02	0	0	0	0.02	0	0	0	0	0	0	0	0	0	0.08	0	0	0	0	0	0.04	0	0	0.04	0	0.04	0	0	0	0.02	0	0	0.2	0.02	0	0.06	0	0	0	0.2
OTU_831	OTU_831;D_0__Bacteria;D_1__Actinobacteria;D_2__Actinobacteria;D_3__Actinomycetales;D_4__Actinomycetaceae;D_5__Actinomyces	k__Bacteria;p__Actinobacteria;c__Actinobacteria;o__Actinomycetales;f__Actinomycetaceae;g__Actinomyces;s__gerencseriae			0.00282051		0	0	0	0	0	0	0	0.02	0	0	0	0	0	0	0	0	0	0	0	0	0.02	0	0	0.02	0	0	0	0	0	0	0	0	0.04	0	0	0	0.02	0	0	0.02	0	0	0
OTU_832	OTU_832;D_0__Bacteria;D_1__Firmicutes;D_2__Negativicutes;D_3__Selenomonadales;D_4__Veillonellaceae;D_5__Selenomonas	k__Bacteria;p__Firmicutes;c__Negativicutes;o__Selenomonadales;f__Veillonellaceae;g__Veillonellaceae_[G-1]			0.00333333		0	0	0	0	0	0	0	0	0	0	0.02	0	0	0	0	0.02	0	0	0	0	0	0	0	0	0.02	0	0	0	0.04	0.04	0	0	0	0	0	0	0	0	0	0	0	0	0
OTU_833	OTU_833;D_0__Bacteria;D_1__Firmicutes;D_2__Negativicutes;D_3__Selenomonadales;D_4__Veillonellaceae	k__Bacteria;p__Firmicutes;c__Negativicutes;o__Selenomonadales;f__Veillonellaceae			0.000769231		0	0	0	0	0	0	0	0	0	0	0	0	0	0	0	0	0	0	0	0	0	0	0.02	0	0	0	0	0.02	0	0	0	0	0	0	0	0	0	0	0	0	0	0	0
OTU_834	OTU_834;D_0__Bacteria;D_1__Actinobacteria;D_2__Actinobacteria;D_3__Actinomycetales;D_4__Actinomycetaceae;D_5__Actinomyces	k__Bacteria;p__Actinobacteria;c__Actinobacteria;o__Actinomycetales;f__Actinomycetaceae;g__Actinomyces;(s__naeslundii/s__oris/s__sp._oral_taxon_169/s__sp._oral_taxon_171/s__sp._oral_taxon_175)			0.000512821		0	0	0	0	0	0	0	0	0	0	0	0	0	0	0	0	0	0	0	0	0	0	0	0	0	0	0	0	0	0	0	0	0	0	0	0.02	0	0	0	0	0	0	0
OTU_836	OTU_836;D_0__Bacteria;D_1__Actinobacteria;D_2__Actinobacteria;D_3__Actinomycetales;D_4__Actinomycetaceae;D_5__Actinobaculum;D_6__unculturedbacterium	k__Bacteria;p__Actinobacteria;c__Actinobacteria;o__Actinomycetales;f__Actinomycetaceae;g__Actinobaculum;s__sp._oral_taxon_183			0.00179487		0	0	0	0	0	0	0	0	0	0.02	0	0	0	0.02	0	0	0	0	0	0	0.02	0	0	0	0	0	0.02	0	0	0	0	0.02	0	0	0	0	0	0	0	0	0	0	0.02
OTU_839	OTU_839;D_0__Bacteria;D_1__CandidatedivisionTM7	k__Bacteria;p__Saccharibacteria_(TM7);c__TM7_[C-1];o__TM7_[O-1];f__TM7_[F-1];g__TM7_[G-1];s__sp._oral_taxon_346			0.000769231		0	0	0	0.04	0	0	0	0	0	0	0	0	0	0	0	0	0	0	0	0	0	0	0	0	0	0	0	0	0	0	0	0	0	0	0	0	0	0	0	0	0	0	0
OTU_84	OTU_84;D_0__Bacteria;D_1__Spirochaetae;D_2__Spirochaetes;D_3__Spirochaetales;D_4__Spirochaetaceae;D_5__Treponema;D_6__Treponemamaltophilum	k__Bacteria;p__Spirochaetes;c__Spirochaetia;o__Spirochaetales;f__Spirochaetaceae;g__Treponema;s__maltophilum			0.321282		0	0	0	0.58	0	0.22	0.04	0.02	0	0	0	0.22	1.76	0.06	0	0.8	0.5	0.24	0.1	0.02	0.38	0.32	0	0.3	0.12	0.12	0.02	0.42	0.12	0	0.2	0.34	0	0	0	0	0.4	0.04	0	0	0	0	0
OTU_840	OTU_840;D_0__Bacteria;D_1__Actinobacteria;D_2__Actinobacteria;D_3__Propionibacteriales;D_4__Propionibacteriaceae;D_5__Propionibacterium;D_6__Propionibacteriumpropionicum	k__Bacteria;p__Actinobacteria;c__Actinobacteria;o__Propionibacteriales;f__Propionibacteriaceae;g__Propionibacterium;s__propionicum			0.00025641		0	0	0	0	0	0	0	0	0	0	0	0	0	0	0	0	0	0	0	0	0	0	0	0	0	0	0	0	0	0	0	0	0	0	0	0	0	0	0	0	0	0	0
OTU_841	OTU_841;D_0__Bacteria;D_1__Firmicutes;D_2__Negativicutes;D_3__Selenomonadales;D_4__Veillonellaceae;D_5__Dialister	k__Bacteria;p__Firmicutes;c__Negativicutes;o__Selenomonadales;f__Veillonellaceae;g__Dialister;s__invisus			0.00025641		0	0	0	0	0	0.02	0	0	0	0	0	0	0	0	0	0	0	0	0	0	0	0	0	0	0	0	0	0	0	0	0	0	0	0	0	0	0	0	0	0	0	0	0
OTU_842	OTU_842;D_0__Bacteria;D_1__Firmicutes;D_2__Negativicutes;D_3__Selenomonadales;D_4__Veillonellaceae;D_5__Veillonella;D_6__	k__Bacteria;p__Firmicutes;c__Negativicutes;o__Selenomonadales;f__Veillonellaceae;g__Veillonella			0.00128205		0	0	0	0.02	0.02	0	0	0	0	0	0.02	0	0	0	0	0	0	0	0	0	0	0	0	0	0	0	0	0	0	0	0	0	0	0	0	0	0	0	0	0	0.02	0	0
OTU_843	OTU_843;D_0__Bacteria;D_1__Actinobacteria;D_2__Actinobacteria;D_3__Actinomycetales;D_4__Actinomycetaceae;D_5__Actinomyces	k__Bacteria;p__Actinobacteria;c__Actinobacteria;o__Actinomycetales;f__Actinomycetaceae;g__Actinomyces;s__massiliensis			0.000769231		0	0	0	0	0	0	0	0	0	0	0	0	0	0	0	0	0.02	0	0	0	0	0	0	0	0	0	0	0	0	0	0	0	0	0	0	0	0	0	0	0	0	0	0
OTU_844	OTU_844;D_0__Bacteria;D_1__Spirochaetae;D_2__Spirochaetes;D_3__Spirochaetales;D_4__Spirochaetaceae;D_5__Treponema;D_6__Treponemasp.6:H:D15A-4	k__Bacteria;p__Spirochaetes;c__Spirochaetia;o__Spirochaetales;f__Spirochaetaceae;g__Treponema;s__socranskii			0.00923077		0.02	0	0	0	0	0	0	0	0	0	0	0	0.04	0	0	0.02	0	0	0	0	0	0.02	0.02	0.02	0.02	0	0	0	0.02	0.06	0.04	0	0.02	0	0.04	0	0	0	0	0	0	0	0
OTU_845	OTU_845;D_0__Bacteria;D_1__Actinobacteria;D_2__Actinobacteria;D_3__Actinomycetales;D_4__Actinomycetaceae;D_5__Actinomyces;D_6__	k__Bacteria;p__Actinobacteria;c__Actinobacteria;o__Actinomycetales;f__Actinomycetaceae;g__Actinomyces			0.00410256		0	0	0.02	0	0	0	0	0.02	0	0	0	0	0	0	0	0	0	0	0	0	0	0	0	0	0	0	0	0	0	0	0	0.1	0	0	0	0.02	0	0.02	0	0	0	0	0
OTU_849	OTU_849;D_0__Bacteria;D_1__Firmicutes;D_2__Negativicutes;D_3__Selenomonadales;D_4__Veillonellaceae;D_5__Selenomonas	k__Bacteria;p__Firmicutes;c__Negativicutes;o__Selenomonadales;f__Veillonellaceae;g__Selenomonas;s__sp._oral_taxon_134			0.000512821		0	0	0	0	0	0	0	0	0	0	0	0	0	0	0	0	0	0	0	0	0	0	0	0	0	0	0	0	0	0	0	0	0	0	0	0	0.04	0	0	0	0	0	0
OTU_85	OTU_85;D_0__Bacteria;D_1__Proteobacteria;D_2__Betaproteobacteria;D_3__Burkholderiales;D_4__Burkholderiaceae;D_5__Lautropia;D_6__unculturedbacterium	k__Bacteria;p__Proteobacteria;c__Betaproteobacteria;o__Burkholderiales;f__Burkholderiaceae;g__Lautropia;s__mirabilis			0.166154		0	0.28	0.04	0	0.04	0	0	0.22	0	0	0	0.1	0	0.02	0	0	0	0.02	0	0.58	0	0	0.02	0.02	0	3.12	0.86	0.1	0.12	0.22	0.02	0.02	0.56	0	0.02	0.32	0	1.32	0	0.04	0.16	0	0.26
OTU_852	OTU_852;D_0__Bacteria;D_1__Firmicutes;D_2__Negativicutes;D_3__Selenomonadales;D_4__Veillonellaceae;D_5__Dialister	k__Bacteria;p__Firmicutes;c__Negativicutes;o__Selenomonadales;f__Veillonellaceae;g__Dialister;s__invisus			0.000769231		0	0	0	0	0	0	0	0	0	0	0	0	0	0	0	0	0	0	0	0	0	0	0	0	0	0	0	0	0	0	0	0	0	0	0	0	0	0	0	0	0	0	0
OTU_853	OTU_853;D_0__Bacteria;D_1__Firmicutes;D_2__Negativicutes;D_3__Selenomonadales;D_4__Veillonellaceae	k__Bacteria;p__Firmicutes;c__Negativicutes;o__Selenomonadales;f__Veillonellaceae			0.00948718		0.08	0	0.04	0	0	0	0.02	0	0	0.02	0	0	0	0.06	0	0	0	0	0	0	0	0	0	0.02	0	0	0	0	0	0.02	0	0	0	0.04	0.02	0.02	0.02	0	0	0	0	0	0
OTU_854	OTU_854;D_0__Bacteria;D_1__Firmicutes;D_2__Negativicutes;D_3__Selenomonadales;D_4__Veillonellaceae;D_5__Selenomonas	k__Bacteria;p__Firmicutes;c__Negativicutes;o__Selenomonadales;f__Veillonellaceae;g__Selenomonas;s__sp._oral_taxon_134			0.00102564		0	0	0	0	0	0	0	0	0	0	0	0	0	0.02	0	0	0	0	0	0	0	0	0	0	0	0	0	0	0.02	0.02	0	0	0	0	0	0	0	0	0	0	0	0	0
OTU_855	OTU_855;D_0__Bacteria;D_1__Firmicutes;D_2__Negativicutes;D_3__Selenomonadales;D_4__Veillonellaceae;D_5__Selenomonas	k__Bacteria;p__Firmicutes;c__Negativicutes;o__Selenomonadales;f__Veillonellaceae;g__Selenomonas			0.000512821		0	0	0	0	0	0	0	0	0	0	0	0	0	0	0	0	0	0	0	0	0	0	0	0	0	0	0	0.02	0	0	0	0	0	0	0	0	0	0	0	0	0	0	0
OTU_856	OTU_856;D_0__Bacteria;D_1__Firmicutes;D_2__Negativicutes;D_3__Selenomonadales;D_4__Veillonellaceae;D_5__Selenomonas	k__Bacteria;p__Firmicutes;c__Negativicutes;o__Selenomonadales;f__Veillonellaceae;g__Selenomonas;s__sp._oral_taxon_134			0.00923077		0	0	0	0	0	0	0.02	0	0	0	0	0	0.02	0	0	0.02	0	0	0	0	0	0	0.02	0	0	0	0	0.06	0.06	0	0	0	0	0	0.02	0	0	0	0.02	0	0	0	0
OTU_857	OTU_857;D_0__Bacteria;D_1__Actinobacteria;D_2__Actinobacteria;D_3__Actinomycetales;D_4__Actinomycetaceae;D_5__Actinomyces	k__Bacteria;p__Actinobacteria;c__Actinobacteria;o__Actinomycetales;f__Actinomycetaceae;g__Actinomyces;(s__naeslundii/s__oris/s__sp._oral_taxon_169/s__sp._oral_taxon_171/s__sp._oral_taxon_175)			0.0146154		0	0	0	0	0.02	0	0	0.02	0.02	0.04	0	0.1	0	0.02	0	0	0.04	0	0.06	0.1	0	0	0	0	0	0.02	0	0	0	0.04	0	0.02	0	0	0.04	0.1	0	0.04	0.02	0.02	0.14	0.02	0.04
OTU_86	OTU_86;D_0__Bacteria;D_1__Actinobacteria;D_2__Actinobacteria;D_3__Actinomycetales;D_4__Actinomycetaceae;D_5__Actinobaculum	k__Bacteria;p__Actinobacteria;c__Actinobacteria;o__Actinomycetales;f__Actinomycetaceae;g__Actinobaculum;s__sp._oral_taxon_848			0.135128		0	0	1.34	0	0.88	0	0.1	0.02	0	0.22	0.06	0.06	0.06	0	0.14	0.12	0	0.02	0.2	0	0	0	0	0	0	0	0.04	0	0.06	0.96	0.14	0.06	0.26	0.04	0	0.04	0	0.56	0	0.04	1.24	0	0
OTU_862	OTU_862;D_0__Bacteria;D_1__Firmicutes;D_2__Bacilli;D_3__Lactobacillales;D_4__Streptococcaceae;D_5__Streptococcus	k__Bacteria;p__Firmicutes;c__Bacilli;o__Lactobacillales;f__Streptococcaceae;g__Streptococcus			0.0025641		0	0	0	0	0	0.02	0	0	0	0	0	0	0	0	0	0	0	0	0	0	0	0	0	0	0.02	0	0	0	0	0	0	0	0	0	0	0	0	0	0	0	0	0.02	0
OTU_863	OTU_863;D_0__Bacteria;D_1__Actinobacteria;D_2__Actinobacteria;D_3__Actinomycetales;D_4__Actinomycetaceae;D_5__Actinomyces	k__Bacteria;p__Actinobacteria;c__Actinobacteria;o__Actinomycetales;f__Actinomycetaceae;g__Actinomyces			0.00025641		0	0	0	0	0	0	0	0	0	0	0	0	0	0	0	0	0	0	0	0	0	0	0	0	0	0	0	0	0	0	0	0.02	0	0	0	0	0	0	0	0	0	0	0
OTU_864	OTU_864;D_0__Bacteria;D_1__Actinobacteria;D_2__Actinobacteria;D_3__Corynebacteriales;D_4__Corynebacteriaceae;D_5__Corynebacterium;D_6__Corynebacteriummatruchotii	k__Bacteria;p__Actinobacteria;c__Actinobacteria;o__Corynebacteriales;f__Corynebacteriaceae;g__Corynebacterium;s__matruchotii			0.00512821		0	0.08	0	0	0	0	0	0.04	0	0	0	0.02	0.02	0	0	0	0	0	0	0	0	0	0	0	0	0	0	0	0	0	0	0	0	0	0	0.02	0	0	0	0	0	0	0.12
OTU_865	OTU_865;D_0__Bacteria;D_1__Actinobacteria;D_2__Actinobacteria;D_3__Corynebacteriales;D_4__Corynebacteriaceae;D_5__Corynebacterium	k__Bacteria;p__Actinobacteria;c__Actinobacteria;o__Corynebacteriales;f__Corynebacteriaceae;g__Corynebacterium;s__durum			0.00025641		0	0	0	0	0	0	0	0	0	0	0	0	0	0	0	0	0	0	0	0	0	0	0	0	0	0	0	0	0	0	0	0	0	0	0	0	0	0	0	0	0	0	0
OTU_866	OTU_866;D_0__Bacteria;D_1__Actinobacteria;D_2__Actinobacteria;D_3__Actinomycetales;D_4__Actinomycetaceae;D_5__Actinomyces	k__Bacteria;p__Actinobacteria;c__Actinobacteria;o__Actinomycetales;f__Actinomycetaceae;g__Actinomyces			0.000512821		0	0	0	0	0	0	0	0	0	0	0	0	0	0	0	0	0	0	0	0	0	0	0	0	0	0	0	0	0	0	0	0	0	0	0	0	0	0	0	0	0	0	0
OTU_868	OTU_868;D_0__Bacteria;D_1__Actinobacteria;D_2__Actinobacteria;D_3__Actinomycetales;D_4__Actinomycetaceae;D_5__Actinomyces;D_6__Actinomycessp.oralcloneIO077	k__Bacteria;p__Actinobacteria;c__Actinobacteria;o__Actinomycetales;f__Actinomycetaceae;g__Actinomyces;s__sp._oral_taxon_448			0.00102564		0	0	0	0	0	0	0	0	0	0	0	0	0	0	0	0	0	0	0	0	0	0	0	0	0	0	0	0	0	0	0	0	0	0	0	0	0.02	0	0	0	0.02	0	0
OTU_869	OTU_869;D_0__Bacteria;D_1__Actinobacteria;D_2__Actinobacteria;D_3__Actinomycetales;D_4__Actinomycetaceae;D_5__Actinomyces	k__Bacteria;p__Actinobacteria;c__Actinobacteria;o__Actinomycetales;f__Actinomycetaceae;g__Actinomyces;s__gerencseriae			0.000512821		0	0	0	0	0	0	0	0	0	0	0	0	0	0	0	0	0	0	0	0	0	0	0	0	0	0	0	0	0	0	0	0	0	0	0	0	0	0	0	0.02	0	0	0
OTU_87	OTU_87;D_0__Bacteria;D_1__Proteobacteria;D_2__Deltaproteobacteria;D_3__Desulfovibrionales;D_4__Desulfomicrobiaceae;D_5__Desulfomicrobium;D_6__Desulfomicrobiumorale	k__Bacteria;p__Proteobacteria;c__Deltaproteobacteria;o__Desulfovibrionales;f__Desulfomicrobiaceae;g__Desulfomicrobium;s__orale			0.000769231		0	0	0	0	0	0	0	0.04	0	0	0	0	0	0	0	0	0	0	0	0	0	0	0	0	0	0	0	0	0	0	0	0	0	0	0	0	0	0	0	0	0	0	0
OTU_871	OTU_871;D_0__Bacteria;D_1__Actinobacteria;D_2__Actinobacteria;D_3__Corynebacteriales;D_4__Corynebacteriaceae;D_5__Corynebacterium;D_6__Corynebacteriummatruchotii	k__Bacteria;p__Actinobacteria;c__Actinobacteria;o__Corynebacteriales;f__Corynebacteriaceae;g__Corynebacterium;s__matruchotii			0.000512821		0	0	0	0	0	0	0	0	0	0	0	0	0	0	0	0	0	0	0	0	0	0	0	0	0	0	0	0	0	0	0	0	0	0	0	0	0	0	0	0	0	0	0
OTU_876	OTU_876;D_0__Bacteria;D_1__Firmicutes;D_2__Negativicutes;D_3__Selenomonadales;D_4__Veillonellaceae;D_5__Selenomonas	k__Bacteria;p__Firmicutes;c__Negativicutes;o__Selenomonadales;f__Veillonellaceae			0.00871795		0	0	0	0.02	0	0	0	0	0.12	0.04	0	0	0	0	0	0.02	0	0	0	0	0.06	0.04	0.02	0	0	0	0	0	0	0.02	0	0	0	0	0	0	0	0	0	0.02	0	0	0
OTU_877	OTU_877;D_0__Bacteria;D_1__Actinobacteria;D_2__Actinobacteria;D_3__Actinomycetales;D_4__Actinomycetaceae;D_5__Actinomyces	k__Bacteria;p__Actinobacteria;c__Actinobacteria;o__Actinomycetales;f__Actinomycetaceae;g__Actinomyces			0.00102564		0	0	0	0	0.02	0	0	0	0	0	0	0	0	0	0	0	0	0	0	0	0	0	0	0	0	0.02	0	0	0	0	0	0	0	0	0	0	0	0	0	0	0	0	0
OTU_879	OTU_879;D_0__Bacteria;D_1__Bacteroidetes;D_2__Flavobacteriia;D_3__Flavobacteriales;D_4__Flavobacteriaceae;D_5__Capnocytophaga;D_6__unculturedbacterium	k__Bacteria;p__Bacteroidetes;c__Flavobacteriia;o__Flavobacteriales;f__Flavobacteriaceae;g__Capnocytophaga			0.00435897		0	0	0	0	0.08	0	0	0	0	0	0.02	0	0	0	0	0.02	0	0	0	0	0	0	0	0	0	0	0	0	0	0	0	0	0	0	0	0	0	0.08	0	0	0	0	0.04
OTU_880	OTU_880;D_0__Bacteria;D_1__Firmicutes;D_2__Negativicutes;D_3__Selenomonadales;D_4__Veillonellaceae;D_5__Selenomonas	k__Bacteria;p__Firmicutes;c__Negativicutes;o__Selenomonadales;f__Veillonellaceae;g__Veillonellaceae_[G-1];s__sp._oral_taxon_155			0.00205128		0	0	0	0	0	0	0	0	0	0	0	0	0	0	0	0	0	0	0	0	0	0	0.02	0	0.02	0	0	0	0.02	0	0	0	0	0	0	0	0	0	0	0	0	0	0
OTU_881	OTU_881;D_0__Bacteria;D_1__Actinobacteria;D_2__Actinobacteria;D_3__Actinomycetales;D_4__Actinomycetaceae;D_5__Actinomyces	k__Bacteria;p__Actinobacteria;c__Actinobacteria;o__Actinomycetales;f__Actinomycetaceae;g__Actinomyces;s__gerencseriae			0.00205128		0	0	0	0	0.02	0	0	0	0	0	0	0	0.02	0	0	0	0	0	0	0	0	0	0	0	0	0.02	0	0	0	0	0	0	0.02	0	0	0	0	0	0	0	0	0	0
OTU_882	OTU_882;D_0__Bacteria;D_1__Firmicutes;D_2__Negativicutes;D_3__Selenomonadales;D_4__Veillonellaceae	k__Bacteria;p__Firmicutes;c__Negativicutes;o__Selenomonadales;f__Veillonellaceae			0.00384615		0	0	0	0.06	0	0	0	0	0	0	0	0	0	0.02	0	0	0	0	0	0	0	0	0.04	0	0	0	0	0	0	0	0	0	0	0	0	0	0	0	0	0	0	0.02	0
OTU_883	OTU_883;D_0__Bacteria;D_1__Firmicutes;D_2__Negativicutes;D_3__Selenomonadales;D_4__Veillonellaceae	k__Bacteria;p__Firmicutes;c__Negativicutes;o__Selenomonadales;f__Veillonellaceae			0.00102564		0	0	0	0	0	0	0	0	0	0	0	0	0	0	0	0.02	0	0	0	0	0	0	0	0.04	0	0	0	0	0	0	0	0	0.02	0	0	0	0	0	0	0	0	0	0
OTU_885	OTU_885;D_0__Bacteria;D_1__Firmicutes;D_2__Negativicutes;D_3__Selenomonadales;D_4__Veillonellaceae;D_5__Selenomonas	k__Bacteria;p__Firmicutes;c__Negativicutes;o__Selenomonadales;f__Veillonellaceae;g__Veillonellaceae_[G-1]			0.00025641		0	0	0	0	0	0	0	0	0	0	0	0	0	0	0	0	0	0	0	0	0	0	0	0	0	0	0	0	0.02	0	0	0	0	0	0	0	0	0	0	0	0	0	0
OTU_886	OTU_886;D_0__Bacteria;D_1__Actinobacteria;D_2__Actinobacteria;D_3__Actinomycetales;D_4__Actinomycetaceae;D_5__Actinomyces;D_6__	k__Bacteria;p__Actinobacteria;c__Actinobacteria;o__Actinomycetales;f__Actinomycetaceae;g__Actinomyces;s__dentalis			0.00025641		0	0	0	0	0	0	0	0	0	0	0	0	0	0	0	0	0	0	0	0	0	0	0	0	0	0	0	0	0	0	0	0	0	0	0	0	0	0	0	0	0	0	0
OTU_887	OTU_887;D_0__Bacteria;D_1__Firmicutes;D_2__Negativicutes;D_3__Selenomonadales;D_4__Veillonellaceae;D_5__Selenomonas;D_6__	k__Bacteria;p__Firmicutes;c__Negativicutes;o__Selenomonadales;f__Veillonellaceae;g__Veillonellaceae_[G-1]			0.00282051		0	0	0	0	0	0	0.02	0	0	0	0	0	0.02	0	0	0	0	0	0	0	0	0	0	0	0	0	0	0	0.06	0	0	0	0	0	0	0	0	0	0	0.02	0	0	0
OTU_888	OTU_888;D_0__Bacteria;D_1__Bacteroidetes;D_2__Bacteroidia;D_3__Bacteroidales;D_4__Prevotellaceae;D_5__Prevotella	k__Bacteria;p__Bacteroidetes;c__Bacteroidia;o__Bacteroidales;f__Prevotellaceae;g__Prevotella;s__veroralis			0.0389744		0	0	0	0	0	0	0.22	0	0	0	0	0	0	0	0.14	0.18	0	0	0	0	0.02	0	0	0	0.04	0	0.12	0.1	0	0.02	0	0	0	0	0	0	0	0	0.08	0.02	0	0.12	0
OTU_889	OTU_889;D_0__Bacteria;D_1__Actinobacteria;D_2__Actinobacteria;D_3__Actinomycetales;D_4__Actinomycetaceae;D_5__Actinomyces	k__Bacteria;p__Actinobacteria;c__Actinobacteria;o__Actinomycetales;f__Actinomycetaceae;g__Actinomyces;s__meyeri			0.00025641		0	0	0	0	0	0	0	0	0	0	0	0	0	0	0	0	0	0	0	0	0	0	0	0	0	0	0	0	0	0	0	0	0	0	0	0	0	0	0	0	0	0	0
OTU_89	OTU_89;D_0__Bacteria;D_1__Fusobacteria;D_2__Fusobacteriia;D_3__Fusobacteriales;D_4__Leptotrichiaceae;D_5__Leptotrichia	k__Bacteria;p__Fusobacteria;c__Fusobacteriia;o__Fusobacteriales;f__Leptotrichiaceae;g__Leptotrichia;s__sp._oral_taxon_219			0.131026		0.2	0	0.08	0.24	0	0	0.02	0	0	0	0.04	0	0	0.06	0	0	0	0.24	0	0	0	0	0	0	0	0	5.5	0	0	0	0	0	0	0	0.24	0	0	0.14	0.02	0.06	0	0	0.92
OTU_890	OTU_890;D_0__Bacteria	k__Bacteria;p__Actinobacteria;c__Actinobacteria;o__Corynebacteriales;f__Corynebacteriaceae;g__Corynebacterium;s__matruchotii			0.00128205		0	0	0	0	0	0	0	0	0	0	0	0	0	0	0	0	0	0	0	0	0	0	0	0	0	0	0	0	0.02	0	0	0	0	0	0	0	0	0	0	0	0	0	0
OTU_892	OTU_892;D_0__Bacteria;D_1__Firmicutes;D_2__Negativicutes;D_3__Selenomonadales;D_4__Veillonellaceae	k__Bacteria;p__Firmicutes;c__Negativicutes;o__Selenomonadales;f__Veillonellaceae;g__Selenomonas			0.00025641		0	0	0	0	0	0	0	0	0	0	0	0	0	0	0	0	0	0	0	0	0	0	0	0	0	0	0	0	0	0	0	0	0	0	0	0	0	0	0	0	0	0	0
OTU_9	OTU_9;D_0__Bacteria;D_1__Bacteroidetes;D_2__Bacteroidia;D_3__Bacteroidales;D_4__Porphyromonadaceae;D_5__Porphyromonas	k__Bacteria;p__Bacteroidetes;c__Bacteroidia;o__Bacteroidales;f__Porphyromonadaceae;g__Porphyromonas;s__gingivalis			0.884359		0	0	0	0	0	1.38	0	0.82	0.02	0	0.14	0	0	0	0	0	1.5	0	0	0	5.36	0	0	0	0	0	0	0	0	0	0	0	6.26	0	0	0	0	0.02	0.02	11.26	0	0	0
OTU_90	OTU_90;D_0__Bacteria;D_1__Firmicutes;D_2__Clostridia;D_3__Clostridiales;D_4__Peptococcaceae;D_5__Peptococcus;D_6__	k__Bacteria;p__Firmicutes;c__Clostridia;o__Clostridiales;f__Peptococcaceae;g__Peptococcus;(s__sp._oral_taxon_167/s__sp._oral_taxon_168)			0.06		0	0	0	0.18	0	0.02	0.06	0	0	0	0	0	0	0	0	0	0.22	0	0.02	0	0	1.1	0	0.08	0.08	0.06	0	0.16	0.04	0	0.16	0	0	0	0	0	0.04	0.02	0	0	0	0	0
OTU_91	OTU_91;D_0__Bacteria;D_1__Firmicutes;D_2__Clostridia;D_3__Clostridiales;D_4__Lachnospiraceae;D_5__Catonella;D_6__unculturedbacterium	k__Bacteria;p__Firmicutes;c__Clostridia;o__Clostridiales;f__Lachnospiraceae_[XIV];g__Catonella;(s__morbi/s__sp._oral_taxon_164)			0.0789744		0.14	0.08	0	0.24	0	0.02	0.32	0	0.02	0	0.14	0.02	0.28	0.06	0	0.14	0	0.06	0.04	0.02	0.28	0.04	0.38	0.06	0.2	0.02	0.1	0.1	0.1	0.08	0.44	0	0.02	0.04	0.26	0	0.04	0.02	0	0	0.04	0	0
OTU_92	OTU_92;D_0__Bacteria;D_1__Bacteroidetes;D_2__Bacteroidia;D_3__Bacteroidales;D_4__Prevotellaceae;D_5__Prevotella	k__Bacteria;p__Bacteroidetes;c__Bacteroidia;o__Bacteroidales;f__Prevotellaceae;g__Prevotella;s__baroniae			0.0910256		0	0	0	0	0	0	0.08	0.04	0	0	0	0	0	0	0	1.02	0.16	0	0	0	0.02	0	0.24	0	1.14	0	0	0	0	0	0	0.96	0.06	0	0	0	0	0	0	0.2	0	0	0
OTU_93	OTU_93;D_0__Bacteria;D_1__Firmicutes;D_2__Clostridia;D_3__Clostridiales;D_4__Lachnospiraceae;D_5__Lachnoanaerobaculum	k__Bacteria;p__Firmicutes;c__Clostridia;o__Clostridiales;f__Lachnospiraceae_[XIV];g__Lachnoanaerobaculum			0.120256		0	5.58	0	0	0	0.04	0.14	0.04	0.08	0	0.8	0	0	0.06	0	0	0	0	0.06	0	0	0	0	0.06	0.02	0.06	0.02	0	0.06	0.02	0	0	0	0.66	0	0.34	0	0.18	0	0.04	0	0	0.04
OTU_94	OTU_94;D_0__Bacteria;D_1__Bacteroidetes;D_2__Flavobacteriia;D_3__Flavobacteriales;D_4__Flavobacteriaceae;D_5__Bergeyella;D_6__unculturedbacterium	k__Bacteria;p__Bacteroidetes;c__Flavobacteriia;o__Flavobacteriales;f__Flavobacteriaceae;g__Bergeyella;s__sp._oral_taxon_322			0.0812821		0	0.48	0.26	0.02	0.24	0	0.12	0.08	0.02	0.02	0.02	0.08	0	0	0.02	0.08	0	0.16	0.08	0.1	0	0	0	0.04	0	0.38	0.34	0.02	0.06	0	0	0.02	0.1	0.08	0.02	0.7	0.02	0.6	0.06	0	0.04	0	0.32
OTU_95	OTU_95;D_0__Bacteria;D_1__Bacteroidetes;D_2__Bacteroidia;D_3__Bacteroidales;D_4__Rikenellaceae;D_5__RC9gutgroup;D_6__	k__Bacteria;p__Bacteroidetes;c__Bacteroidetes_[C-1];o__Bacteroidetes_[O-1];f__Bacteroidetes_[F-1];g__Bacteroidetes_[G-3];s__sp._oral_taxon_365			0.0658974		0	0	0	0	0	0.04	0	0	0	0	0.14	0	0	0	0	0.08	1.32	0	0	0	0	0	0	0.12	0	0	0	0	0	2.12	0	0	0	0	0	0	0	0	0	0	0	0	0
OTU_96	OTU_96;D_0__Bacteria;D_1__Firmicutes;D_2__Negativicutes;D_3__Selenomonadales;D_4__Veillonellaceae;D_5__uncultured	k__Bacteria;p__Firmicutes;c__Negativicutes;o__Selenomonadales;f__Veillonellaceae;g__Mitsuokella;s__sp._oral_taxon_521			0.141282		0	0	0	0	0	0	0	0	0	0	0	0.18	0	0	0	0	0	0.36	0	0	0	0.02	0	0.98	0	0	0	0.42	0	0.1	0.18	0.02	0	0	0	0	0	0	0	0	0	0	0
OTU_97	OTU_97;D_0__Bacteria;D_1__Firmicutes;D_2__Bacilli;D_3__Lactobacillales;D_4__Streptococcaceae;D_5__Streptococcus	k__Bacteria;p__Firmicutes;c__Bacilli;o__Lactobacillales;f__Streptococcaceae;g__Streptococcus;s__mutans			0.101538		0	0	0	0	0	0	0.06	0	0	0.08	0.1	0.4	0	0	0	0	0.08	0	0	0	0.14	0	0.02	0	0	0	0	0	0.78	0.06	0	0.04	0	0	0	0	0	0	0	0.06	0.92	0.02	0
OTU_98	OTU_98;D_0__Bacteria;D_1__Tenericutes;D_2__Mollicutes;D_3__Mycoplasmatales;D_4__Mycoplasmataceae;D_5__Mycoplasma	k__Bacteria;p__Firmicutes;c__Mollicutes;o__Mycoplasmatales;f__Mycoplasmataceae;g__Mycoplasma;s__salivarium			0.0633333		0.54	0	0	0	0	0.02	0	0	0.02	0	0.06	0.04	0.58	0.2	0	0.08	0	0	0	0.02	0.26	0	0	0.02	0	0	0	0	0	0.12	0	0.02	0	0	0	0	0	0	0	0	0	0	0
OTU_99	OTU_99;D_0__Bacteria;D_1__Firmicutes;D_2__Clostridia;D_3__Clostridiales;D_4__FamilyXIII;D_5__IncertaeSedis;D_6__EubacteriumsaphenumATCC49989	k__Bacteria;p__Firmicutes;c__Clostridia;o__Clostridiales;f__Peptostreptococcaceae_[XI];g__Peptostreptococcaceae_[XI][G-5];s__[Eubacterium]_saphenum			0.0405128		0	0	0	0	0	0.04	0	0	0	0	0	0.02	0	0	0	0.1	0.08	0	0.02	0	0.06	0	0	0	0	0	0	0	0.12	0.26	0	0	0	0	0	0	0	0	0	0	0	0	0
					Gender: 1=males, 2=females; Periodontal status: 1=gingivitis, 2=mild periodontitis, 3=moderate periodontitis, 4=severe periodontitis; Smoking status: 1=never smokers, 2=current smokers, 3=former smokers; Disease activity: 0=remission, 1=active disease; Joint damage, Seropositivity: 0=negative, 1= positive; RA Medication code: 0=no medication, 1=conventional (c), 2=biological (b), 3=combination of…
[truncated: 35 more columns]
