# Supplementary material for: Subgingival microbiome of rheumatoid arthritis patients in relation to their disease status and periodontal health
Source: PLoS One. 2018 Sep 19;13(9):e0202278. doi: 10.1371/journal.pone.0202278 (PMC6145512; doi:10.1371/journal.pone.0202278)
Supplement: S4 Table — (A) Smoking status, (B) Tertiles of PD, (C) Tertiles of PI (D) Tertiles of BoP, (F) RA disease activity, active RA and RA remission, (G) Community type 1 and community type 2, CT1 and CT2. (XLSX) [file pone.0202278.s005.xlsx]

## Sheet: S4A_smoking
S4A Table. Significantly discriminatory OTUs between the microbiome sample clusters (Smoking status). From the 552 OTUs, 37 discriminated significantly between smoking status (LDA >2, p<0.05, LEfSe). Never smokers (N=29)=green bars; former smokers (N=35)=blue bars; current smokers (N=14)=red bars.
OTU_ID_Genus	log of the highest class average	SmokingStatus_Tertiles	LDA effect size	p value
OTU_39_D_5__Leptotrichia	4.25889	1	3.83111	0.0399193
OTU_356_D_5__Neisseria	3.62397	1	3.35985	0.010358
OTU_42_D_5__Cardiobacterium	3.7808	1	3.33539	0.012571
OTU_35_D_5__Actinobaculum	4.03562	1	3.70653	0.000241332
OTU_148_D_5__Prevotella	3.10703	2	3.22313	0.0127685
OTU_127_D_5__Mogibacterium	2.90341	2	3.28053	0.037472
OTU_370_D_5__Treponema	2.78655	2	3.21258	0.00433506
OTU_17_D_5__Treponema	4.17034	2	3.74981	0.00956177
OTU_123_D_4__Defluviitaleaceae	2.74536	2	3.28122	0.00828785
OTU_117_D_5__Prevotella	3.3056	2	3.18551	0.00118124
OTU_454_D_4__Synergistaceae	3.20875	2	3.16098	0.023041
OTU_107_D_5__Anaeroglobus	3.27067	2	2.96983	0.0186267
OTU_27_D_5__Tannerella	4.15865	2	3.65638	0.0154915
OTU_128_D_5__Treponema	3.38749	2	3.15178	0.0104555
OTU_1_D_5__Fusobacterium	5.34432	2	4.56201	0.0172103
OTU_10_D_5__Paludibacter	4.35102	2	3.85143	0.0245769
OTU_24_D_5__Fretibacterium	4.38342	2	3.97208	0.00237457
OTU_157_D_1__TM7	3.35528	2	3.22683	0.00208547
OTU_58_D_5__Treponema	4.05179	2	3.67151	0.0294913
OTU_271_D_5__Actinomyces	4.13518	2	3.78244	0.00510453
OTU_551_D_5__Actinomyces	3.39496	2	3.17767	0.00621763
OTU_16_D_4__Synergistaceae	4.52089	2	4.02549	0.0105252
OTU_98_D_5__Mycoplasma	3.22517	2	3.30823	0.000125755
OTU_13_D_5__Treponema	4.0515	2	3.50955	0.0158995
OTU_45_D_5__Selenomonas	4.04907	2	3.55151	0.014913			same font size
OTU_152_D_5__Treponema	3.46262	2	3.23179	0.0052365
OTU_66_D_5__Prevotella	3.4172	2	3.0942	0.00220645
OTU_57_D_5__Gemella	3.3269	3	3.09735	0.0168559
OTU_18_D_5__Neisseria	4.31055	3	3.93734	0.00719544
OTU_26_D_5__Haemophilus	3.97038	3	3.64433	0.0163493
OTU_85_D_5__Lautropia	3.44219	3	3.22926	0.000333279
OTU_46_D_5__Capnocytophaga	3.67458	3	3.42049	0.0157188
OTU_222_D_5__Cardiobacterium	3.4833	3	3.20529	0.0382847
OTU_94_D_5__Bergeyella	3.00492	3	3.0704	0.0371886
OTU_253_D_5__Aggregatibacter	3.64596	3	3.31902	0.0281358
OTU_44_D_5__Corynebacterium	4.02281	3	3.65307	0.0216476
OTU_547_D_5__Actinomyces	2.6669	3	3.08312	0.0134445

## Sheet: S4B_PD_tertiles
S4B Table. Significantly discriminatory OTUs between the microbiome sample clusters (Tertiles of PD). From the 552 OTUs, 26 discriminated significantly between the samples of the lowest and highest tertile of PD (LDA >2, p<0.05, LEfSe). Samples in the lowest tertile of PPD (2.2-2.5 mm)=aqua bars; samples in the highest tertile of PPD (2.8-4.4 mm)=red bars.
OTU_ID_Genus	log of the highest class average	PD_Tertiles	LDA effect size	p value
OTU_47_D_5__Actinomyces	4.31635	1	3.62952	0.0294178
OTU_42_D_5__Cardiobacterium	3.9676	1	3.51705	0.0021352
OTU_46_D_5__Capnocytophaga	3.82057	1	3.4066	0.0294489
OTU_253_D_5__Aggregatibacter	3.76692	1	3.46141	0.0243501
OTU_44_D_5__Corynebacterium	4.06707	1	3.51566	0.00900471
OTU_82_D_5__Leptotrichia	3.45013	1	3.10307	0.00489207
OTU_116_D_5__Capnocytophaga	3.45747	1	3.1851	0.00243555
OTU_127_D_5__Mogibacterium	2.73977	3	3.08272	0.0455581
OTU_71_D_5__Anaeroglobus	3.67661	3	3.23232	0.0446765
OTU_239_D_5__Fusobacterium	3.22558	3	2.92171	0.0292242
OTU_27_D_5__Tannerella	4.05716	3	3.52611	0.0124885
OTU_1_D_5__Fusobacterium	5.28548	3	4.53323	0.00406225
OTU_24_D_5__Fretibacterium	4.17553	3	3.64705	0.0119083
OTU_103_D_5__Prevotella	3.02715	3	2.98068	0.00224483
OTU_115_D_5__Alloprevotella	3.00339	3	2.95426	0.0297154
OTU_75_D_5__Actinomyces	3.44614	3	2.86343	0.0231443
OTU_13_D_5__Treponema	3.9844	3	3.51772	0.00802967
OTU_31_D_5__Selenomonas	4.11863	3	3.23688	0.0307369
OTU_34_D_5__Parvimonas	3.69466	3	3.22961	0.0026559
OTU_73_D_4__Coriobacteriaceae	3.38518	3	2.96801	0.0339834
OTU_16_D_4__Synergistaceae	4.39831	3	3.87866	0.0134496
OTU_81_D_5__Desulfobulbus	3.06168	3	2.97621	0.0325233
OTU_142_D_4__Anaerolineaceae	2.87648	3	2.9411	0.0254301
OTU_98_D_5__Mycoplasma	3.00401	3	2.87044	0.00463519
OTU_106_D_5__Phocaeicola	2.87766	3	2.97222	0.0384447
OTU_66_D_5__Prevotella	3.18252	3	2.78443	0.0165447

## Sheet: S4C_PI_tertiles
S4C Table. Significantly discriminatory OTUs between the microbiome sample clusters (Tertiles of PI). From the 552 OTUs, 27 discriminated significantly between the samples of the lowest and highest tertile of PI (LDA >2, p<0.05, LEfSe). Samples in the lowest tertile of PI (7-25 %)=aqua bars; samples in the highest tertile of PI (36-86 %)=red bars.
OTU_ID_Genus	log of the highest class average	PI_Tertiles	LDA effect size	p value
OTU_42_D_5__Cardiobacterium	3.90806	1	3.50933	0.00241148
OTU_44_D_5__Corynebacterium	4.13605	1	3.70582	0.00450529
OTU_232_D_5__Streptococcus	4.0948	1	3.6702	0.00780692
OTU_547_D_5__Actinomyces	2.75088	1	3.33136	0.00856321
OTU_37_D_4__Pasteurellaceae	3.85932	1	3.26364	0.00984229
OTU_8_D_5__Streptococcus	4.27493	1	3.78077	0.0115558
OTU_50_D_5__Leptotrichia	3.90853	1	3.47808	0.0144339
OTU_53_D_5__Prevotella	3.59905	1	3.0858	0.0146098
OTU_15_D_5__Rothia	4.55855	1	4.16499	0.017204
OTU_22_D_5__Actinomyces	4.64222	1	4.08848	0.0210819
OTU_36_D_5__Kingella	3.9942	1	3.54828	0.0260525
OTU_47_D_5__Actinomyces	4.26648	1	3.69307	0.0286213
OTU_222_D_5__Cardiobacterium	3.54184	1	3.04533	0.0400428
OTU_239_D_5__Fusobacterium	3.33847	3	3.05449	0.000106726
OTU_200_D_5__Prevotella	3.53939	3	3.21022	0.0023501
OTU_175_D_1__TM7	3.06829	3	3.0722	0.00579374
OTU_421_D_5__Prevotella	2.7002	3	3.53163	0.00910904
OTU_103_D_5__Prevotella	3.24175	3	3.04492	0.0137934
OTU_54_D_5__Bifidobacterium	3.99277	3	3.76238	0.0153771
OTU_592_D_5__Alloprevotella	2.92291	3	3.01745	0.0179321
OTU_654_D_5__Prevotella	2.9749	3	3.31773	0.0188215
OTU_136_D_5__Stomatobaculum	2.83951	3	3.14686	0.0270343
OTU_95_D_4__Rikenellaceae	3.0905	3	2.83604	0.0283433
OTU_888_D_5__Prevotella	2.53407	3	3.36658	0.0316432
OTU_11_D_5__Treponema	4.48446	3	3.65368	0.0324916
OTU_1_D_5__Fusobacterium	5.28078	3	4.2511	0.0368295
OTU_45_D_5__Selenomonas	3.84302	3	3.14892	0.0422689

## Sheet: S4D_BoP_tertiles
S4D Table. Significantly discriminatory OTUs between the microbiome sample clusters (Tertiles of BoP scores). From the 552 OTUs, 21 discriminated significantly between the tertiles of BoP scores (LDA >2, p<0.05, LEfSe). Samples in the lowest tertile of BoP(2-23 %)=aqua bars; samples in the intermediate tertile of BoP(24-35 %)=purple bars, and samples in the highest tertile of BoP (36-82 %)=red ba…
OTU_ID_Genus	log of the highest class average	BoP_Tertiles	LDA effect size	p value
OTU_25_D_5__Prevotella	4.33572	1	4.12486	0.00108547
OTU_66_D_5__Prevotella	3.32832	1	3.1397	0.00287706
OTU_108_D_5__Campylobacter	3.04893	1	2.8382	0.0277487
OTU_237_D_5__Selenomonas	3.63137	2	3.20668	0.0138619
OTU_544_D_5__Selenomonas	2.72718	2	3.12861	0.0194145
OTU_33_D_5__Selenomonas	4.40167	2	3.67215	0.0401088
OTU_103_D_5__Prevotella	3.31377	3	3.39151	0.00126791
OTU_99_D_4__Clostridiales_Fam_XIII	2.96762	3	3.31312	0.00176719
OTU_95_D_4__Rikenellaceae	3.14222	3	3.09701	0.00220692
OTU_13_D_5__Treponema	4.15396	3	3.67885	0.00349931
OTU_98_D_5__Mycoplasma	3.02624	3	2.91573	0.00363599
OTU_127_D_5__Mogibacterium	2.80276	3	3.51047	0.00364831
OTU_117_D_5__Prevotella	3.08676	3	3.25346	0.00455875
OTU_654_D_5__Prevotella	3.01392	3	3.30365	0.00523365
OTU_24_D_5__Fretibacterium	4.21851	3	3.78394	0.00745191
OTU_115_D_5__Alloprevotella	3.05347	3	3.10026	0.0170753
OTU_16_D_4__Synergistaceae	4.4107	3	3.87574	0.0182505
OTU_105_D_5__Prevotella	3.2883	3	3.18254	0.020057
OTU_20_D_5__Alloprevotella	4.54047	3	4.00129	0.0231803
OTU_383_D_4__Coriobacteriaceae	2.96838	3	3.47278	0.0374019
OTU_454_D_4__Synergistaceae	3.004	3	3.35134	0.0425124

## Sheet: S4E_DAS
S4E Table. Significantly discriminatory OTUs between the microbiome sample clusters (Active RA and RA in remission). From the 552 OTUs, 21 discriminated significantly between samples from individuals with active RA and RA in remission (LDA >2, p<0.05, LEfSe). Active RA (N=60)=grey bars; RA remission (N=20)=black bars.
OTU_ID_Genus	log of the highest class average	DAS28	LDA effect size	p value
OTU_544_D_5__Selenomonas	2.71413	0	3.55256	0.0263906
OTU_546_D_5__Selenomonas	2.82228	0	2.97804	0.0170466
OTU_421_D_5__Prevotella	2.87899	0	2.97259	0.000718954
OTU_103_D_5__Prevotella	3.20304	0	3.03711	0.0495254
OTU_14_D_5__Prevotella	4.53855	0	3.81974	0.0479856
OTU_52_D_5__Prevotella	3.76222	0	3.11376	0.0318418
OTU_95_D_4__Rikenellaceae	3.15445	0	3.03674	0.0390062
OTU_3_D_5__Prevotella	4.61969	0	3.95359	0.0336926
OTU_67_D_5__Oribacterium	3.21444	0	2.65835	0.00927633
OTU_654_D_5__Prevotella	2.80224	0	3.15365	0.00983126
OTU_78_D_5__Atopobium	3.67858	0	3.24016	0.0391656
OTU_132_D_4__Clostridiales_Fam_XIII	2.56723	0	3.39452	0.0329594
OTU_239_D_5__Fusobacterium	3.2848	0	3.12867	0.0178626
OTU_40_D_5__Prevotella	4.3232	0	3.83931	0.00305244
OTU_31_D_5__Selenomonas	4.27927	0	3.73425	0.00744967
OTU_491_D_5__Prevotella	2.61018	0	2.9102	0.0331096
OTU_2_D_5__Corynebacterium	4.94879	1	4.27077	0.0216848
OTU_117_D_5__Prevotella	2.76239	1	2.88661	0.0469676
OTU_628_D_5__Streptococcus	2.57832	1	3.05233	0.0326961
OTU_22_D_5__Actinomyces	4.56057	1	3.99125	0.036753
OTU_5_D_5__Veillonella	4.59365	1	3.89421	0.021398

## Sheet: S4F_Prednisolon
S4F Table. Significantly discriminatory OTUs between the microbiome sample clusters (use - and non-use of prednisolone). From the 552 OTUs, 19 discriminated significantly use and non-use of prednisolone (LDA >2, p<0.05, LEfSe). Prednisolone (N=21)=black dots; no prednisolone (N=57)=grey dots.
OTU_ID_Genus	log of the highest class average	Prednisolon	LDA effect size	p value
OTU_127_D_5__Mogibacterium	2.67776	1	2.56359	0.00797148
OTU_17_D_5__Treponema	3.8825	1	3.44014	0.0494302
OTU_123_D_4__Defluviitaleaceae	2.5042	1	2.20343	0.0409793
OTU_128_D_5__Treponema	2.85553	1	2.64896	0.0315621
OTU_24_D_5__Fretibacterium	4.08824	1	3.68182	0.0246518
OTU_158_D_5__Prevotella	2.56078	1	2.52599	0.0291026
OTU_103_D_5__Prevotella	3.03256	1	2.62549	0.0257788
OTU_80_D_5__Dialister	3.17862	1	2.63077	0.0337457
OTU_383_D_4__Coriobacteriaceae	2.85954	1	2.507	0.0366
OTU_119_D_5__Prevotella	3.22222	1	2.85546	0.0123661
OTU_78_D_5__Atopobium	3.58749	1	3.12108	0.0360456
OTU_132_D_4__Clostridiales_Fam_XIII	2.54402	1	2.53178	0.0101361
OTU_239_D_5__Fusobacterium	3.23434	1	2.63817	0.0127212
OTU_491_D_5__Prevotella	2.5851	1	2.43828	0.0315621
OTU_150_D_5__Selenomonas	3.5995	2	2.97809	0.0391219
OTU_38_D_5__Streptococcus	3.96741	2	3.39013	0.0272469
OTU_42_D_5__Cardiobacterium	3.84986	2	3.12717	0.013783
OTU_48_D_5__Capnocytophaga	4.11465	2	3.6376	0.000592423
OTU_36_D_5__Kingella	4.19356	2	3.6664	0.016462

## Sheet: S4G_CCA23
S4G Table. Significantly discriminatory OTUs between the microbiome sample clusters (community type 1 and community type 2, CT1 and CT2). From the 552 OTUs, 113 discriminated significantly between the two community types (LDA >2, p<0.05, LEfSe). Community type CT1=black dots and CT2=aqua dots.
OTU_ID_Genus	log of the highest class average	CT	LDA effect size	p value
OTU_24_D_5__Fretibacterium	4.33381	1	3.996	1.646e-10
OTU_132_D_4__Clostridiales_Fam_XIII	2.78567	1	2.88826	5.12787e-10
OTU_383_D_4__Coriobacteriaceae	3.12707	1	2.89935	1.29935e-09
OTU_454_D_4__Synergistaceae	3.27382	1	3.02134	1.29979e-09
OTU_16_D_4__Synergistaceae	4.51975	1	4.15981	7.4913e-09
OTU_127_D_5__Mogibacterium	2.90165	1	2.92132	4.52919e-08
OTU_45_D_5__Selenomonas	4.11668	1	3.73775	1.84733e-07
OTU_61_D_3__Sphingobacteriales	3.79374	1	3.45148	3.55718e-07
OTU_66_D_5__Prevotella	3.47526	1	3.18023	4.41342e-07
OTU_239_D_5__Fusobacterium	3.37268	1	3.03282	5.83243e-07
OTU_27_D_5__Tannerella	4.10165	1	3.61053	6.1724e-07
OTU_6_D_5__Porphyromonas	4.34515	1	3.97325	6.72197e-07
OTU_71_D_5__Anaeroglobus	3.88804	1	3.52089	6.74518e-07
OTU_21_D_5__Prevotella	4.38993	1	4.02689	7.69655e-07
OTU_13_D_5__Treponema	4.2262	1	3.90292	8.90167e-07
OTU_94_D_5__Bergeyella	3.11044	2	2.86768	1.12058e-06
OTU_99_D_4__Clostridiales_Fam_XIII	2.99709	1	2.84973	1.27186e-06
OTU_58_D_5__Treponema	3.93182	1	3.57312	2.2976e-06
OTU_17_D_5__Treponema	4.11954	1	3.77869	2.34483e-06
OTU_70_D_5__Prevotella	3.49353	1	3.13755	2.4829e-06
OTU_2_D_5__Corynebacterium	5.00288	2	4.49654	3.52962e-06
OTU_119_D_5__Prevotella	3.41726	1	3.03123	4.22434e-06
OTU_56_D_4__Clostridiales_Fam_XIII	3.34922	1	2.97078	4.23396e-06
OTU_370_D_5__Treponema	2.85378	1	2.88895	4.67236e-06
OTU_41_D_5__Filifactor	3.79254	1	3.50204	5.74377e-06
OTU_42_D_5__Cardiobacterium	3.87877	2	3.44308	9.35157e-06
OTU_22_D_5__Actinomyces	4.63384	2	4.16336	9.92127e-06
OTU_115_D_5__Alloprevotella	3.11192	1	2.94417	1.19277e-05
OTU_123_D_4__Defluviitaleaceae	2.83067	1	2.7927	1.23872e-05
OTU_11_D_5__Treponema	4.58205	1	4.00978	1.57755e-05
OTU_103_D_5__Prevotella	3.28038	1	3.0163	2.69889e-05
OTU_336_D_5__Selenomonas	3.17041	1	2.93617	3.96869e-05
OTU_510_D_5__Actinomyces	2.72523	1	2.98209	4.14161e-05
OTU_5_D_5__Veillonella	4.6888	2	4.2725	6.27058e-05
OTU_84_D_5__Treponema	3.75856	1	3.31388	6.54055e-05
OTU_46_D_5__Capnocytophaga	3.76592	2	3.4267	8.68992e-05
OTU_245_D_5__Veillonella	4.39137	2	3.91091	8.78112e-05
OTU_1_D_5__Fusobacterium	5.31745	1	4.53239	9.19282e-05
OTU_63_D_3__Lactobacillales	3.28815	2	2.94706	0.000104981
OTU_43_D_5__Capnocytophaga	3.91578	2	3.44742	0.000122652
OTU_157_D_1__TM7	3.17835	1	2.86863	0.000133235
OTU_36_D_5__Kingella	4.06877	2	3.61613	0.000138651
OTU_152_D_5__Treponema	3.19876	1	2.99388	0.00015047
OTU_148_D_5__Prevotella	2.73842	1	2.62917	0.000221374
OTU_80_D_5__Dialister	3.41575	1	3.04436	0.000343847
OTU_222_D_5__Cardiobacterium	3.4467	2	2.96895	0.000534881
OTU_232_D_5__Streptococcus	3.95172	2	3.5053	0.000540722
OTU_73_D_4__Coriobacteriaceae	3.393	1	2.84255	0.000582762
OTU_34_D_5__Parvimonas	3.67585	1	2.95352	0.000714963
OTU_39_D_5__Leptotrichia	4.26541	2	3.85756	0.000745837
OTU_107_D_5__Anaeroglobus	3.44066	1	3.11624	0.000776091
OTU_482_D_5__Corynebacterium	3.1403	2	2.81658	0.000878052
OTU_64_D_5__Capnocytophaga	4.23777	2	3.71896	0.000894181
OTU_44_D_5__Corynebacterium	4.05088	2	3.62559	0.00100686
OTU_8_D_5__Streptococcus	4.29404	2	3.8266	0.00103378
OTU_76_D_5__Lachnoanaerobaculum	3.5831	2	3.23571	0.00149522
OTU_78_D_5__Atopobium	3.68226	1	3.15375	0.00161846
OTU_592_D_5__Alloprevotella	3.09336	1	2.81745	0.00168962
OTU_69_D_5__Leptotrichia	3.58287	2	3.32429	0.0017378
OTU_144_D_4__Rikenellaceae	3.35757	1	3.05903	0.00174146
OTU_92_D_5__Prevotella	3.25702	1	2.98481	0.00177166
OTU_32_D_5__Porphyromonas	3.96602	2	3.64212	0.00186673
OTU_95_D_4__Rikenellaceae	3.17342	1	2.88802	0.00187199
OTU_30_D_5__Dialister	4.06594	1	3.48327	0.0019983
OTU_308_D_5__Leptotrichia	3.36537	2	2.97236	0.00201775
OTU_128_D_5__Treponema	3.09973	1	2.9479	0.00212822
OTU_442_D_5__Campylobacter	3.80325	1	3.2253	0.0023738
OTU_20_D_5__Alloprevotella	4.53232	1	3.90189	0.0023965
OTU_197_D_5__Shuttleworthia	2.64643	1	2.70489	0.00243463
OTU_134_D_4__Clostridiales_Fam_XIII	2.80377	1	2.62321	0.00285049
OTU_40_D_5__Prevotella	4.23989	1	3.53173	0.00328365
OTU_108_D_5__Campylobacter	3.05673	2	2.70076	0.00335684
OTU_253_D_5__Aggregatibacter	3.65358	2	3.27188	0.00343592
OTU_54_D_5__Bifidobacterium	3.76847	2	3.41227	0.00350987
OTU_90_D_5__Peptococcus	3.07783	1	2.76588	0.00353749
OTU_26_D_5__Haemophilus	3.96162	2	3.61459	0.0035495
OTU_338_D_5__Leptotrichia	3.12956	2	2.87099	0.00360263
OTU_31_D_5__Selenomonas	4.24812	1	3.61738	0.0036571
OTU_98_D_5__Mycoplasma	2.9873	1	2.64278	0.00366886
OTU_29_D_5__Leptotrichia	4.29761	2	3.86343	0.00430933
OTU_150_D_5__Selenomonas	3.65128	2	3.23801	0.00486361
OTU_18_D_5__Neisseria	4.23798	2	3.72895	0.00546311
OTU_149_D_5__Actinomyces	2.96458	1	2.61408	0.00602073
OTU_82_D_5__Leptotrichia	3.2586	2	3.02856	0.00614227
OTU_106_D_5__Phocaeicola	2.78843	1	2.694	0.00741384
OTU_35_D_5__Actinobaculum	3.98	2	3.52537	0.0102494
OTU_623_D_5__Capnocytophaga	2.97023	2	2.75658	0.0107228
OTU_624_D_5__Leptotrichia	2.92298	1	2.5548	0.0119837
OTU_3_D_5__Prevotella	4.63162	1	3.99872	0.0126119
OTU_25_D_5__Prevotella	4.25962	1	3.94605	0.0140098
OTU_145_D_5__Pseudoramibacter	2.66618	1	2.49541	0.014116
OTU_547_D_5__Actinomyces	2.69737	2	2.73369	0.0149463
OTU_75_D_5__Actinomyces	3.4278	1	2.60072	0.0185669
OTU_48_D_5__Capnocytophaga	3.97912	2	3.57187	0.0186781
OTU_696_D_5__Veillonella	2.72045	2	2.79786	0.0219447
OTU_57_D_5__Gemella	3.28783	2	2.89165	0.0219552
OTU_116_D_5__Capnocytophaga	3.23841	2	2.93233	0.0224412
OTU_85_D_5__Lautropia	3.38017	2	2.9659	0.0226543
OTU_158_D_5__Prevotella	2.67258	1	2.67144	0.0235489
OTU_23_D_5__Prevotella	4.19364	1	3.5317	0.0236218
OTU_514_D_4__Neisseriaceae	2.57107	2	2.53106	0.024447
OTU_604_D_5__Fusobacterium	2.60265	1	2.83767	0.0249417
OTU_91_D_5__Catonella	3.04896	1	2.77471	0.0251048
OTU_332_D_5__Leptotrichia	3.01277	2	2.67692	0.0260694
OTU_51_D_5__Leptotrichia	4.04328	2	3.4332	0.0262878
OTU_669_D_5__Capnocytophaga	3.0825	2	2.78487	0.0276979
OTU_47_D_5__Actinomyces	4.27295	2	3.6719	0.032079
OTU_105_D_5__Prevotella	3.29323	1	2.98582	0.0321789
OTU_654_D_5__Prevotella	2.75361	1	2.41348	0.0342096
OTU_79_D_5__Treponema	2.87939	1	2.76358	0.0354061
OTU_628_D_5__Streptococcus	2.56879	2	2.86417	0.043587
OTU_419_D_5__Leptotrichia	3.16584	2	2.71184	0.04507
OTU_53_D_5__Prevotella	3.57021	2	3.18913	0.0479648
